# Supplementary material for: Age, stage and senescence in plants
Source: PubMed Central journal article supplement (PMC3664411; doi:10.1111/1365-2745.12088), 2013-04-24
Supplement: jec0101-0585-SD1.pdf [file jec0101-0585-SD1.pdf]

# Age, stage, and senescence in plants

Online Only

Appendix S1: Age- and stage-specific selection gradients for selected plant species

Hal Caswell\*

Biology Department MS-34  
Woods Hole Oceanographic Institution  
Woods Hole MA 02543 USA

and

Max Planck Institute for Demographic Research

Roberto Salguero-Gómez

Max Planck Institute for Demographic Research  
Rostock, Germany

February 18, 2013

---

\*Correspondence author. Email: [hcaswell@whoi.edu](mailto:hcaswell@whoi.edu)

## Contents

|                                                          |          |
|----------------------------------------------------------|----------|
| <b>S1 Selection gradients for selected plant species</b> | <b>3</b> |
| S1.1 <i>Arisaema serratum</i>                            | 7        |
| S1.2 <i>Aspasia principissa</i>                          | 10       |
| S1.3 <i>Borderea chouardii</i>                           | 13       |
| S1.4 <i>Calathea ovandensis</i>                          | 16       |
| S1.5 <i>Calathea micans</i>                              | 19       |
| S1.6 <i>Calochortus lyallii</i>                          | 22       |
| S1.7 <i>Chamaecrista keyensis</i>                        | 25       |
| S1.8 <i>Chamaelirium luteum</i>                          | 28       |
| S1.9 <i>Cryptantha flava</i>                             | 31       |
| S1.10 <i>Cytisus scoparius</i>                           | 34       |
| S1.11 <i>Dicerandra frutescens</i>                       | 37       |
| S1.12 <i>Dicymbe altsonii</i>                            | 40       |
| S1.13 <i>Geonoma macrostachys</i>                        | 43       |
| S1.14 <i>Hylocomium splendens</i>                        | 46       |
| S1.15 <i>Hypericum cumulicola</i>                        | 49       |
| S1.16 <i>Iridaea splendens</i>                           | 52       |
| S1.17 <i>Laminaria digitata</i>                          | 55       |
| S1.18 <i>Lupinus arboreus</i>                            | 58       |
| S1.19 <i>Machaerium cuspidatum</i>                       | 61       |
| S1.20 <i>Opuntia rastrera</i>                            | 64       |
| S1.21 <i>Panax quinquefolium</i>                         | 67       |
| S1.22 <i>Parashorea chinensis</i>                        | 70       |
| S1.23 <i>Periandra mediterranea</i>                      | 73       |
| S1.24 <i>Pinguicula alpina</i>                           | 76       |
| S1.25 <i>Pinus lambertiana</i>                           | 79       |
| S1.26 <i>Pinus ponderosa</i>                             | 82       |
| S1.27 <i>Polystichum aculeatum</i>                       | 85       |
| S1.28 <i>Primula vulgaris</i>                            | 88       |
| S1.29 <i>Pterocarpus angolensis</i>                      | 91       |
| S1.30 <i>Pterocarya rhoifolia</i>                        | 94       |
| S1.31 <i>Rhododendron ponticum</i> (Endangered)          | 97       |
| S1.32 <i>Rhododendron ponticum</i> (Invasive)            | 100      |
| S1.33 <i>Rhopalostylis sapida</i>                        | 103      |
| S1.34 <i>Rourea induta</i>                               | 106      |
| S1.35 <i>Tillandsia recurvata</i>                        | 109      |
| S1.36 <i>Viburnum furcatum</i>                           | 112      |

## Appendix S1 Selection gradients for selected plant species

In this appendix, we present the selection gradients on mortality and fertility for a selection of 36 plant (and red algae) species of a variety of growth forms, habitats and taxa. Table 1 lists their citations, as well as taxonomic, ecological and matrix model characteristics of these species. Data were obtained from the ComPADRe III database of plant and animal population projection models, under development at the Max Planck Institute for Demographic Research, Rostock, Germany.

For each species, we show three views of the gradients. The first shows the sensitivities of  $r = \log \lambda$  to age-specific mortality, age-specific fertility, stage-specific mortality, and stage-specific fertility. The second shows a surface view of the selection gradients on age  $\times$  stage-specific mortality and fertility. The third figure shows the age  $\times$  stage-specific gradients as functions of age and of age normalized by the life expectancy of the first non-seedbank stage in the life-cycle of the species.

| Species (Family)                                  | Citation                                 | Growth form    | Habitat       | Status     | s  | $\alpha$ | FNSS |
|---------------------------------------------------|------------------------------------------|----------------|---------------|------------|----|----------|------|
| 1 <i>Arisaema serratum</i> (Araceae)              | Kinoshita 1987                           | Perennial herb | Temperate     | Common     | 19 | 6        | 1    |
| 2 <i>Aspasia principissa</i> (Orchidaceae)        | Zotz & Schmidt 2006                      | Epiphyte       | Tropical      | Endangered | 7  | 6        | 1    |
| 3 <i>Bordeira chouardii</i> (Dioscoraceae)        | García & Antor 1995                      | Perennial herb | Alpine        | Common     | 8  | 3        | 2    |
| 4 <i>Calathea ovandensis</i> (Marantaceae)        | Horvitz & Schemske 2005                  | Perennial herb | Tropical      | Common     | 8  | 6        | 2    |
| 5 <i>Calathea micans</i> (Marantaceae)            | Le Corff & Horvitz 2005                  | Perennial herb | Tropical      | Common     | 10 | 4        | 1    |
| 6 <i>Calochortus lyallii</i> (Liliaceae)          | Miller, Antos & Allen 2007               | Perennial herb | Grassland     | Common     | 9  | 2        | 1    |
| 7 <i>Chamaecrista keyensis</i> (Fabaceae)         | Liu, Menges & Quintana-Ascencio 2005     | Perennial herb | Temperate     | Endangered | 8  | 3        | 2    |
| 8 <i>Chamaecirium luteum</i> (Liliaceae)          | Meagher 1982                             | Perennial herb | Temperate     | Common     | 24 | 16       | 1    |
| 9 <i>Cryptantha flava</i> (Boraginaceae)          | Lucas, Forseth & Casper 2008             | Subshrub       | Desert        | Common     | 7  | 6        | 1    |
| 10 <i>Cytisus scoparius</i> (Fabaceae)            | Neubert & Parker 2004                    | Shrub          | Temperate     | Invasive   | 7  | 5        | 2    |
| 11 <i>Dicerandra frutescens</i> (Lamiaceae)       | Menges <i>et al.</i> 2006                | Perennial herb | Temperate     | Endangered | 5  | 3        | 2    |
| 12 <i>Dicymbe altsonii</i> (Fabaceae)             | Zagt 1997                                | Tree           | Tropical      | Common     | 15 | 3        | 2    |
| 13 <i>Geonoma macrostachys</i> (Arecaceae)        | Svenning 2002                            | Palm           | Tropical      | Common     | 10 | 6        | 1    |
| 14 <i>Hylacomium splendens</i> (Hylacomiaceae)    | Okland 1995                              | Moss           | Alpine        | Common     | 6  | 5        | 2    |
| 15 <i>Hypericum cumulicola</i> (Clusiaceae)       | Quintana-Ascencio, Menges & Weekley 2003 | Perennial herb | Temperate     | Endangered | 6  | 4        | 1    |
| 16 <i>Iridaea splendens</i> (Gigartiniaceae)      | Ang <i>et al.</i> 1990                   | Red algae      | Marine        | Common     | 8  | 4        | 1    |
| 17 <i>Laminaria digitata</i> (Laminariaceae)      | Chapman 1993                             | Green algae    | Shore         | Common     | 5  | 4        | 2    |
| 18 <i>Lupinus arboreus</i> (Fabaceae)             | Kauffman & Maron 2006                    | Shrub          | Dune          | Common     | 9  | 8        | 2    |
| 19 <i>Machaerium cuspidatum</i> (Fabaceae)        | Nabe-Nielsen 2004                        | Liana          | Tropical      | Common     | 9  | 7        | 1    |
| 20 <i>Opuntia rastrera</i> (Cactaceae)            | Mandujano <i>et al.</i> 2001             | Succulent      | Desert        | Common     | 10 | 9        | 2    |
| 21 <i>Panax quinquefolium</i> (Araliaceae)        | Nantel, Gagnon & Nault 1996              | Perennial herb | Temperate     | Endangered | 5  | 3        | 2    |
| 22 <i>Parashorea chinensis</i> (Dipterocarpaceae) | Chien, Zuidema & Nghia 2008              | Tree           | Tropical      | Endangered | 15 | 9        | 1    |
| 23 <i>Periandra mediterranea</i> (Fabaceae)       | Hoffmann & Solbrig 2003                  | Sub-shrub      | Tropical      | Common     | 8  | 7        | 1    |
| 24 <i>Pinguicula alpina</i> (Lentibulariaceae)    | Svensson <i>et al.</i> 1993              | Perennial herb | Tundra        | Common     | 11 | 5        | 1    |
| 25 <i>Pinus lambertiana</i> (Pinaceae)            | van Mantgem & Stepheson 2005             | Tree           | Temperate     | Common     | 5  | 1        | 1    |
| 26 <i>Pinus ponderosa</i> (Pinaceae)              | van Mantgem & Stepheson 2005             | Tree           | Temperate     | Common     | 5  | 1        | 1    |
| 27 <i>Polystichum aculeatum</i> (Dryopteridaceae) | de Groot 2011                            | Fern           | Temperate     | Common     | 7  | 3        | 2    |
| 28 <i>Primula vulgaris</i> (Primulaceae)          | Valverde & Silvertown 1998               | Perennial herb | Mediterranean | Common     | 5  | 3        | 2    |
| 29 <i>Pterocarpus angolensis</i> (Fabaceae)       | Desmet, Shackleton & Robinson 1996       | Tree           | Montane       | Common     | 4  | 3        | 1    |
| 30 <i>Pterocarya rhoifolia</i> (Juglandaceae)     | Kaneko & Kawano 2002                     | Tree           | Temperate     | Common     | 7  | 1        | 1    |
| 31 <i>Rhododendron ponticum</i> (Ericaceae)       | Salguero-Gómez 2004                      | Tree           | Temperate     | Endangered | 4  | 2        | 1    |
| 32 <i>Rhododendron pontium</i> (Ericaceae)        | Salguero-Gómez 2004                      | Shrub          | Temperate     | Invasive   | 4  | 2        | 1    |
| 33 <i>Rhopalostylis sapida</i> (Arecaceae)        | Enright & Watson 1992                    | Palm           | Temperate     | Common     | 8  | 4        | 1    |
| 34 <i>Rourea induta</i> (Connaraceae)             | Hoffmann 1999                            | Shrub          | Savannah      | Common     | 14 | 11       | 1    |
| 35 <i>Tillandsia recurvata</i> (Bromeliaceae)     | T. Valverde & R. Bernal pers. comm.      | Epiphyte       | Tropical      | Common     | 4  | 3        | 1    |
| 36 <i>Viburnum furcatum</i> (Adoxaceae)           | Hara <i>et al.</i> 2004                  | Shrub          | Temperate     | Common     | 7  | 5        | 1    |

**Table 1:** List of species and characteristics. *s*: matrix dimension;  $\alpha$ : first reproductive stage; FNSS: first non-seedbank stage.

## References to studied species

- Ang, P., de Wreede R. D., Shaughnessy, F. & Dyck, L. (1990) A simulation model for an *Iridaea splendens* (Gigartinales, Rhodophyta) population in Vancouver, Canada. *Hydrobiologia*, **204/205**, 191–196.
- Chapman, A. R. O. (1993) 'Hard' data for matrix modelling of *Laminaria digitata* (Laminariales, Phaeophyta) populations. *Hydrobiologia*, **260/261**, 263–267.
- Chien, P. D., Zuidema, P. A., & Nghia, N. H. (2008) Conservation prospects for threatened Vietnamese tree species: results from a demographic study. *Population Ecology*, **50**, 227–237.
- Desmet, P. G., Shackleton, C. M. & Robinson, E. R. (1996) The population dynamics and life-history of a *Pterocarpus angolensis* DC. population in the Northern Province, South Africa. *South Africa Journal of Botany*, **62**, 160–166.
- Enright, N. J. & Watson, A. D. (1992) Population dynamics of the nikau palm, *Rhopalostylis sapida* (Wendl. et Drude), in a temperate forest remnant near Auckland, New Zealand. *New Zealand Journal of Botany*, **20**, 29–43.
- García, M. B. & Antor R. J. (1995) Age and size structure in populations of a long-lived dioecious geophyte: *Borderea pyrenaica* (Dioscoreaceae). *International Journal of Plant Science*, **156**, 236–243.
- de Groot, G. A. (2001) *The Fate of a Colonizer: Successful but Lonely?* PhD thesis. Utrecht University, the Netherlands. p. 197.
- Hara, M., Kanno, H., Hirabuki, Y. & Takehara, A. (2004) Population dynamics of four understory shrub species in beech forest. *Journal of Vegetation Science*, **15**, 475–484.
- Hoffmann, W. A. (1999) Fire and population dynamics of woody plants in a neotropical savanna: matrix model populations. *Ecology*, **80**, 1354–1369.
- Hoffmann, W. A. & Solbrig, O. T. (2003) The role of topkill in the differential response of savanna woody species to fire. *Forest Ecology and Management*, **180**, 273–286.
- Horvitz, C. C. & Schesmke, D. W. (1995) Spatiotemporal variation in demographic transitions of a tropical understory herb: projection matrix analysis. *Ecological Monographs*, **65**, 155–192.
- Kaneko, Y. & Kawano, S. (2002) Demography and matrix analysis on a natural *Pterocarya rhoifolia* population developed along a mountain stream. *Journal of Plant Research*, **115**, 341–354.
- Kauffman, M. J. & Maron, J. L. (2006) Consumers limit the abundance and dynamics of a perennial shrub with a seed bank. *The American Naturalist*, **168**, 444–470.
- Kinoshita, A. (1987) Sex change and population dynamics in *Arisaema* I. *Arisaema serratum* (Thunb.) Schott. *Plant Species Biology*, **2**, 15–28.
- LeCorff, J. & Horvitz, C. C. (2005) The contrasting roles of chasmogamous and cleistogamous reproduction in population growth and population spread in an ant-dispersed neotropical herb, *Calathea micans* (Marantaceae). *Ecological Modelling*, **188**, 41–51.
- Liu, H., Menges, E. S., & Quintana-Ascencio, P. F. (2005) Population viability analyses of *Chamaecrista keyensis*: effects of fire season and frequency. *Ecological Applications*, **15**, 210–221.
- Lucas, R. W., Forseth, I. N. & Casper, B. B. (2008) Using rainout shelters to evaluate climate change effects on the demography of *Cryptantha flava*. *Journal of Ecology*, **96**, 514–522.
- Mandujano, M. C., Montana, C., Franco, M., Golubov, J. & Flores-Martínez, A (2001) Integration of demographic annual variability in a clonal desert cactus. *Ecology*, **82**, 344–359.
- van Mantgem, P. J. & Stephenson, N. L. (2005) The accuracy of matrix population model projections for coniferous trees in the Sierra Nevada, California. *Journal of Ecology*, **93**, 737–747.
- Meagher, T. R. (1982) The population biology of *Chamaelirium luteum*, a dioecious member of the lily family: two-sex population projections and stable population structure. *Ecology*, **63**, 1701–1711.

- Menges, E. S., Quintana-Ascencio, P. F., Weekley, C. W., & Gaoue, O. G. (2006) Population viability analysis and fire return intervals of an endemic Florida scrub mint. *Biological Conservation*, **127**, 115–127.
- Miller, M. T & Antos, J. A., & Allen, G. A. (2007) Demographic differences between two sympatric lilies (*Calochortus*) with contrasting distributions, as revealed by matrix analysis. *Plant Ecology*, **191**, 265–278.
- Nabe-Nielsen, J. (2004) Demography of *Machaerium cuspidatum*, a shade-tolerant neotropical liana. *Journal of Tropical Ecology*, **20**, 505–516.
- Nantel, P., Gagnon, D. & Nault, A. (1996) Population viability analysis of American ginseng and wild leek harvested in stochastic environments. *Conservation Biology*, **10**, 608–621.
- Neubert, M. G. & Parker, I. M. (2004) Projecting rates of spread for invasive species. *Risk Analysis*, **24**, 817–831.
- Okland, R. H. (1995) Population biology of the lichen moss *Hylocomium splendens* in Norwegian boreal spruce forests. I. Demography. *Journal of Ecology*, **83**, 697–712.
- Quintana-Ascencio, P. F., Menges, E. S. & Weekley, C. W. (2003) A fire-explicit population viability analysis of *Hypericum cumulicola* in Florida rosemary scrub. *Conservation Biology*, **17**, 433–449.
- Salguero-Gómez, R. (2004) *Rhododendron ponticum* L: Ecological Terminator in the UK... *Ecologically Terminated in Spain?* MSc thesis. Kingston University, UK. p. 200
- Svenning, J.-C. (2002) Crown illumination limits the population growth rate of a neotropical understory palm (*Geonoma macrostachys*, Aracaceae). *Plant Ecology*, **159**, 185–199.
- Svennson, B. M., Carlsson, B. A., Karlsson, P. S. & Nordell, O. (1993) Comparative long-term demography of three species of *Pinguicula*. *Journal of Ecology*, **81**, 635–645.
- Valverde, T & Silvertown, J. (1998) Variation in the demography of a woodland understory herb (*Primula vulgaris*) along the forest regeneration cycle: projection matrix analysis. *Journal of Ecology*, **86**, 545–562.
- Zagt, R. J. (1997) *Tree Demography in the Tropical Rain Forest of Guyana*. PhD thesis. Leiden University, the Netherlands.
- Zotz, G. & Schmidt, G. (2006) Population decline in the epiphytic orchid *Aspasia principissa*. *Biological Conservation*, **129**, 82–90.

### S1.1 *Arisaema serratum*

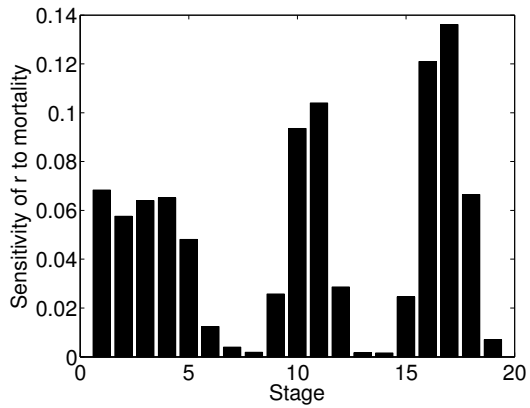

(a) Stage-specific mortality

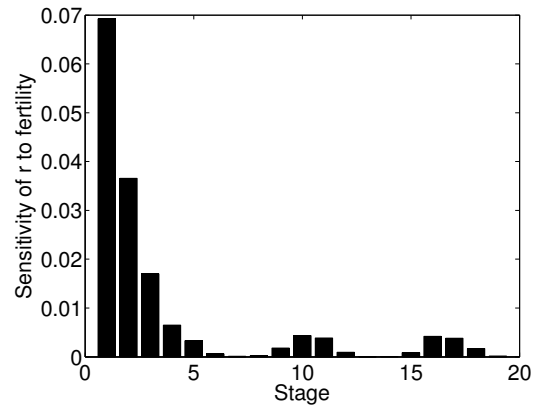

(b) Stage-specific fertility

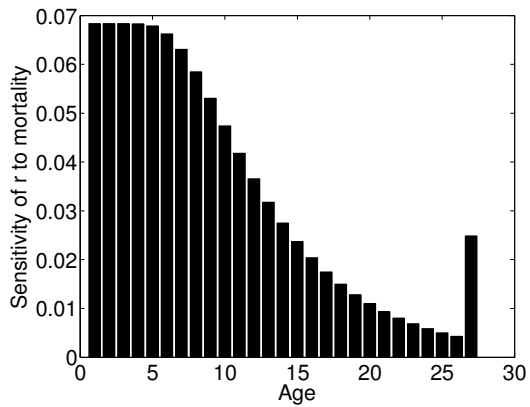

(c) Age-specific mortality

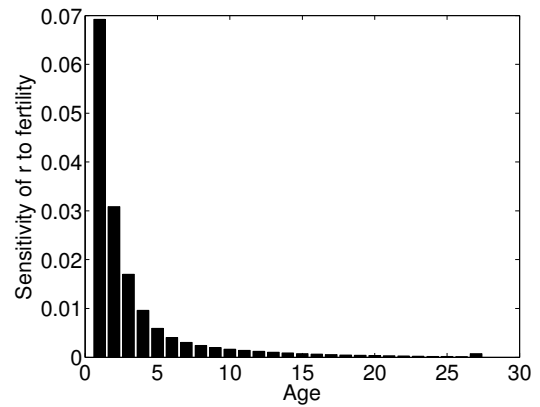

(d) Age-specific fertility

**Figure 1:** Selection gradients on age-specific and stage-specific mortality and fertility.

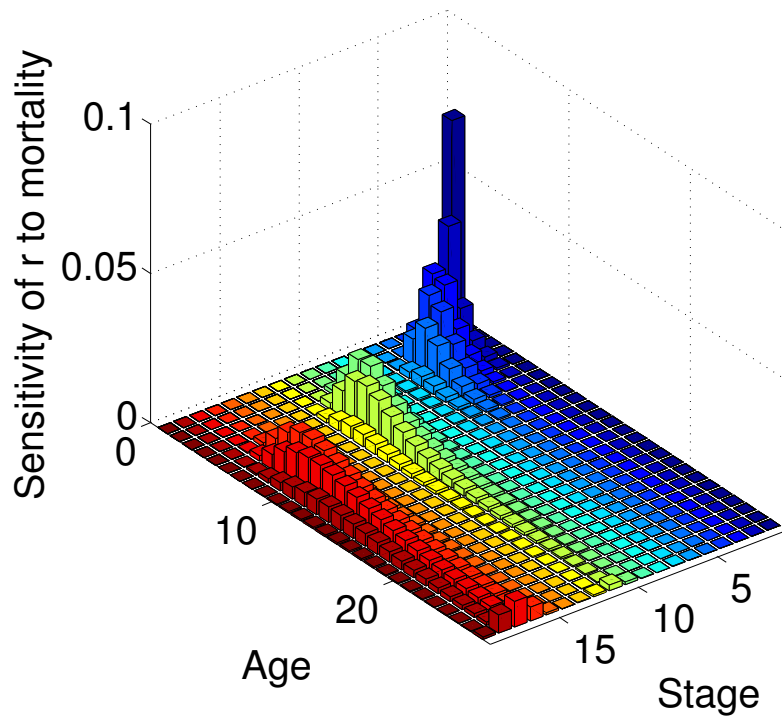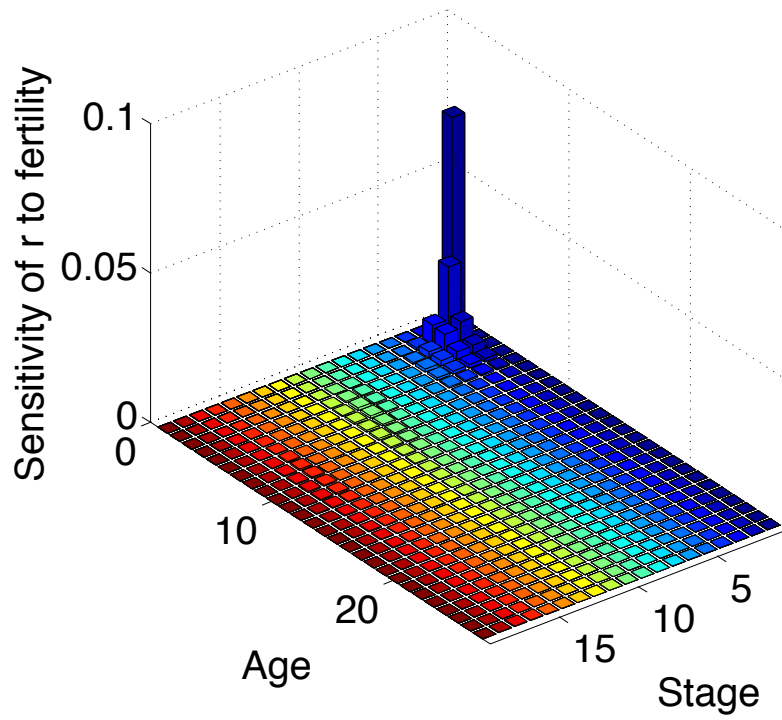

**Figure 2:** Selection gradients on age $\times$ stage-specific mortality and fertility.



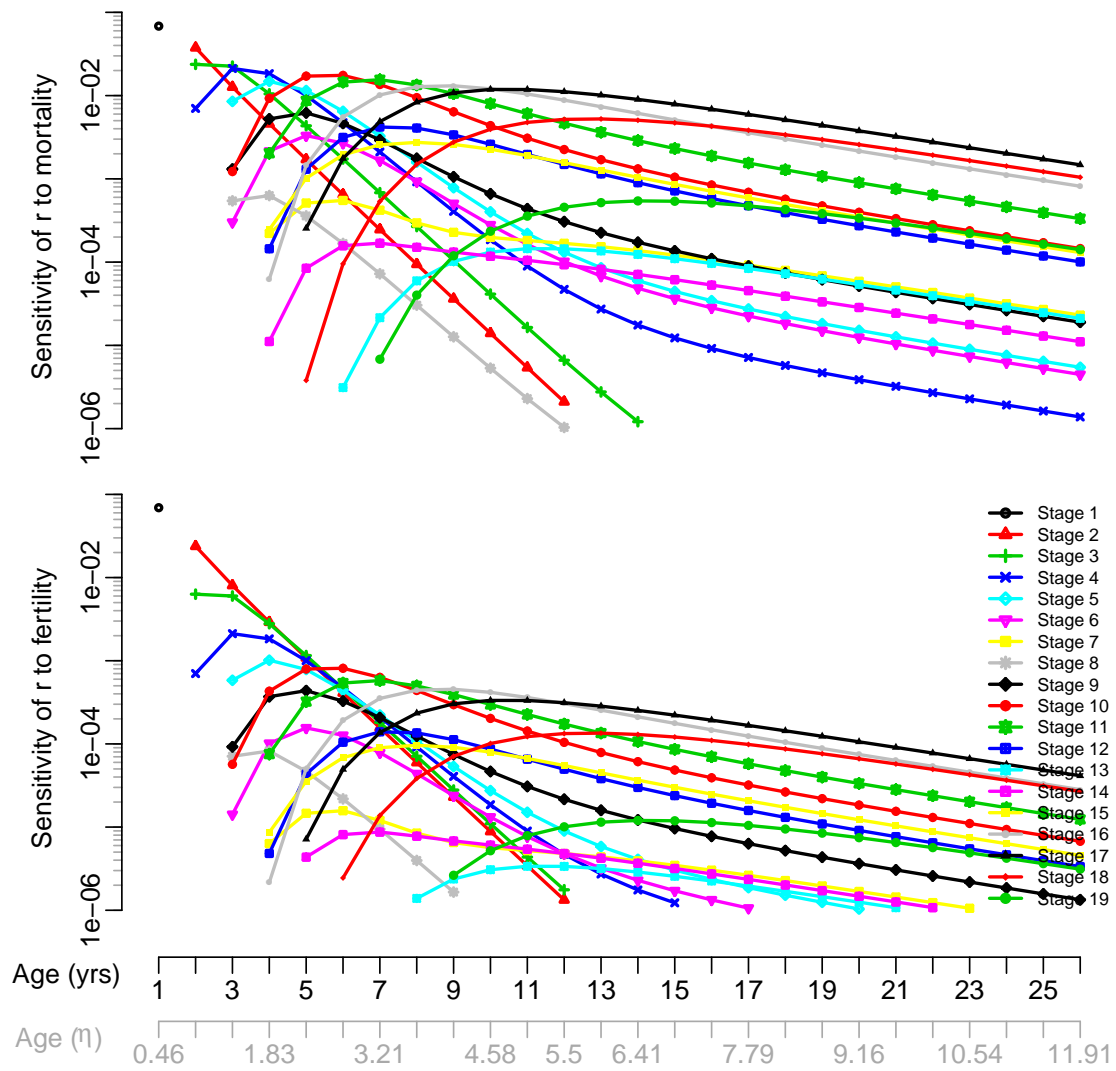

**Figure 3:** Selection gradients on age×stage-specific mortality and fertility. Top  $x$  axis represents age in years, whereas the bottom  $x$  axis represents time-scale normalized by the life expectancy ( $\eta$ ) of the first non-seedbank stage (FNSS) of the species.

## S1.2 *Aspasia principissa*

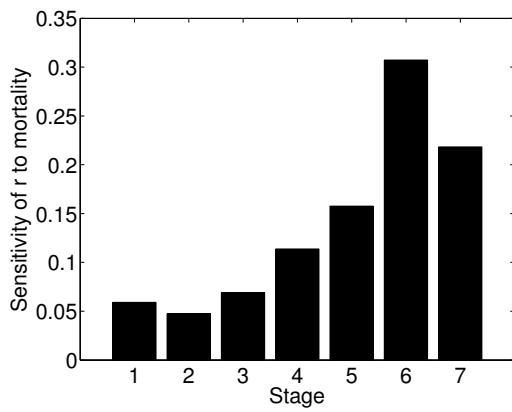

(a) Stage-specific mortality

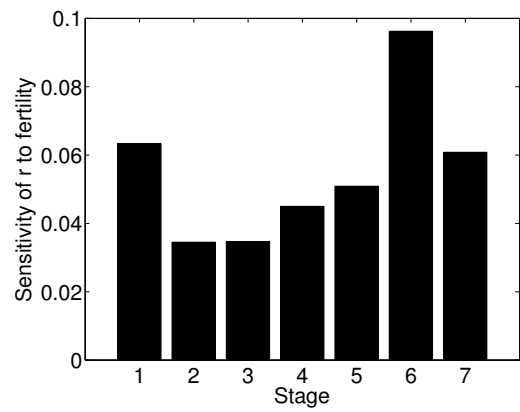

(b) Stage-specific fertility

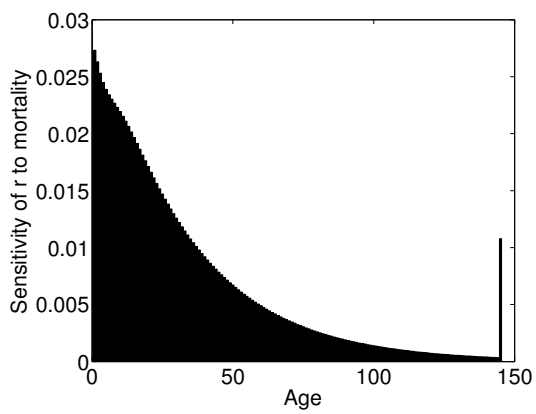

(c) Age-specific mortality

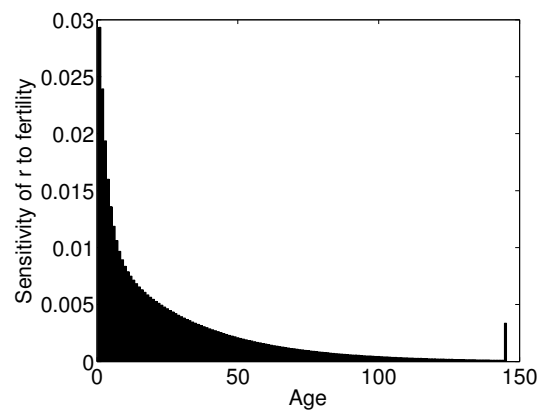

(d) Age-specific fertility

**Figure 4:** Selection gradients on age-specific and stage-specific mortality and fertility.

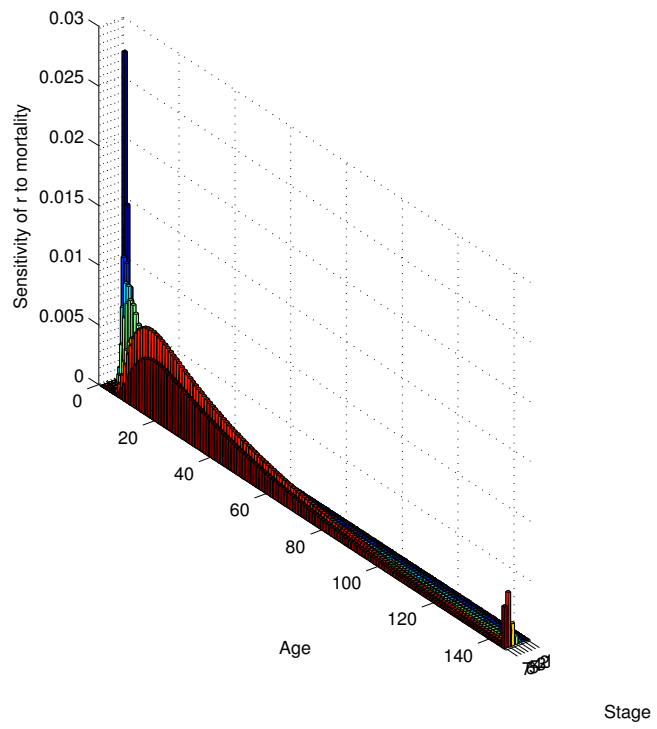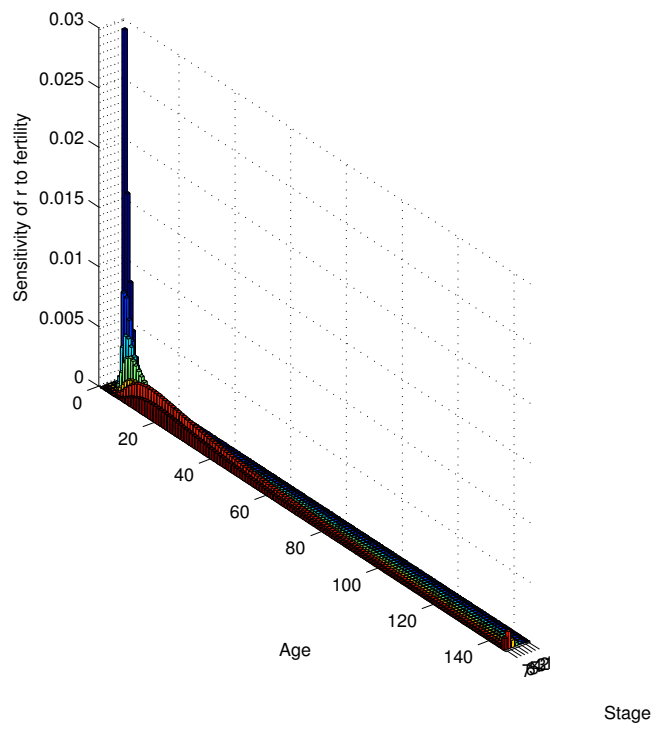

**Figure 5:** Selection gradients on age $\times$ stage-specific mortality and fertility.

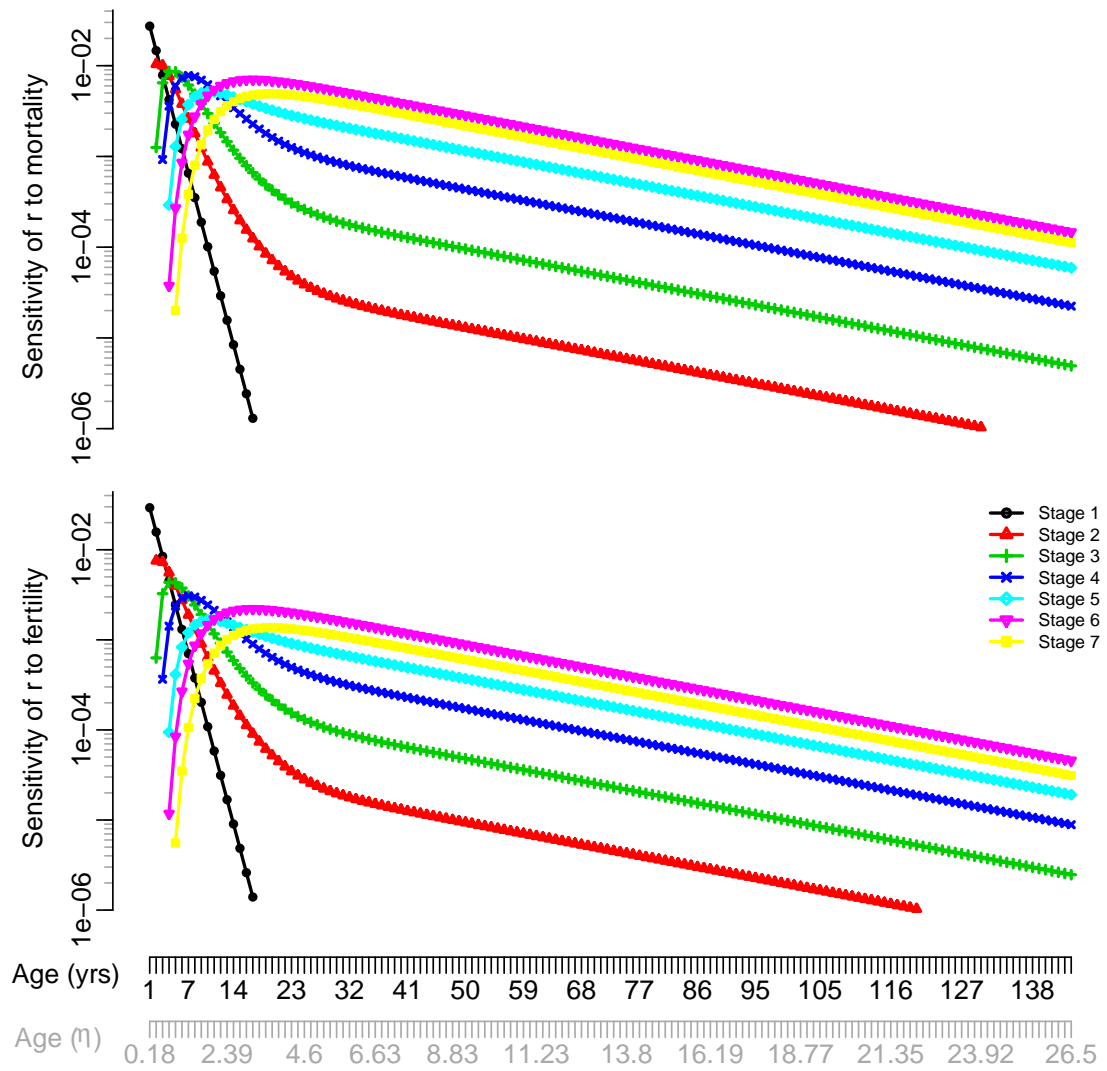

**Figure 6:** Selection gradients on age×stage-specific mortality and fertility. Top  $x$  axis represents age in years, whereas the bottom  $x$  axis represents time-scale normalized by the life expectancy ( $\eta$ ) of the first non-seedbank stage (FNSS) of the species.

### S1.3 *Borderea chouardii*

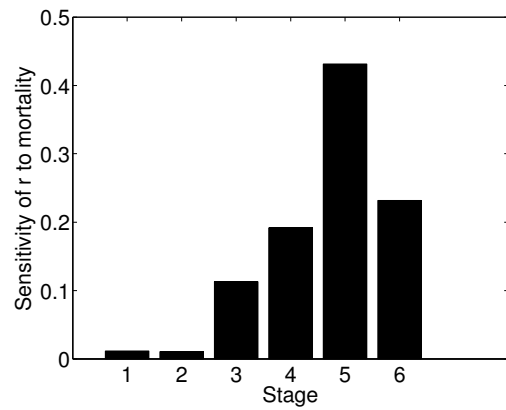

(a) Stage-specific mortality

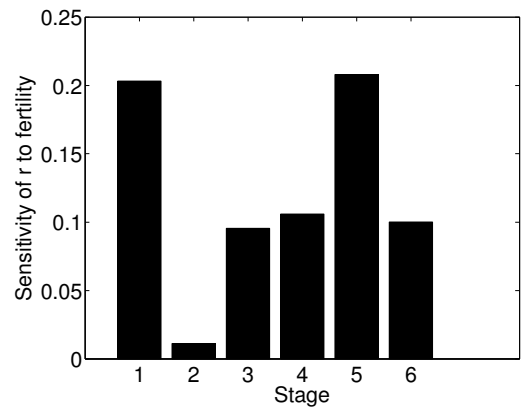

(b) Stage-specific fertility

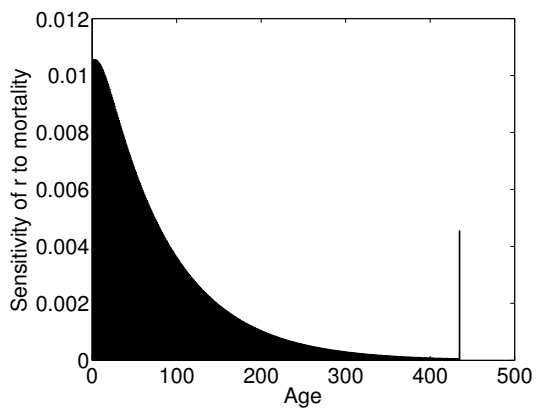

(c) Age-specific mortality

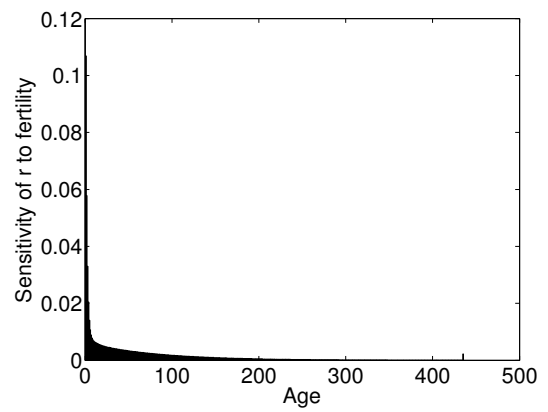

(d) Age-specific fertility

**Figure 7:** Selection gradients on age-specific and stage-specific mortality and fertility.

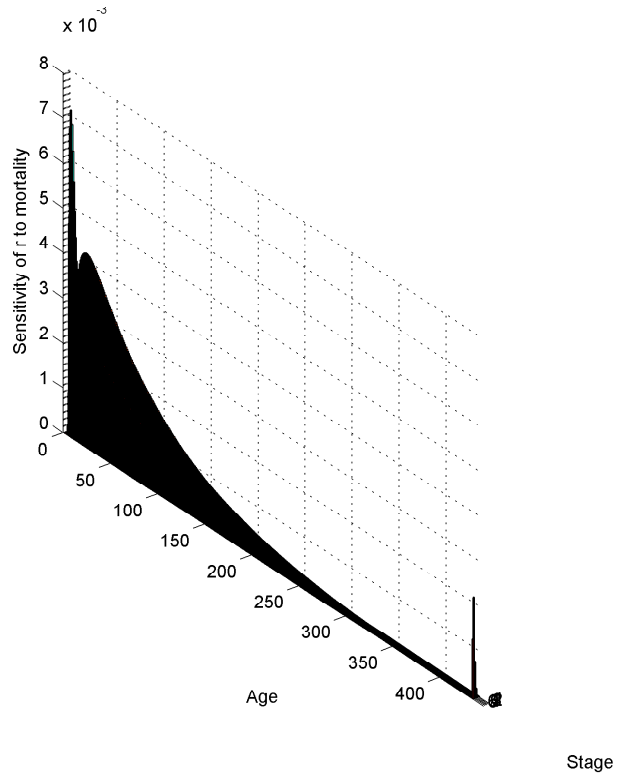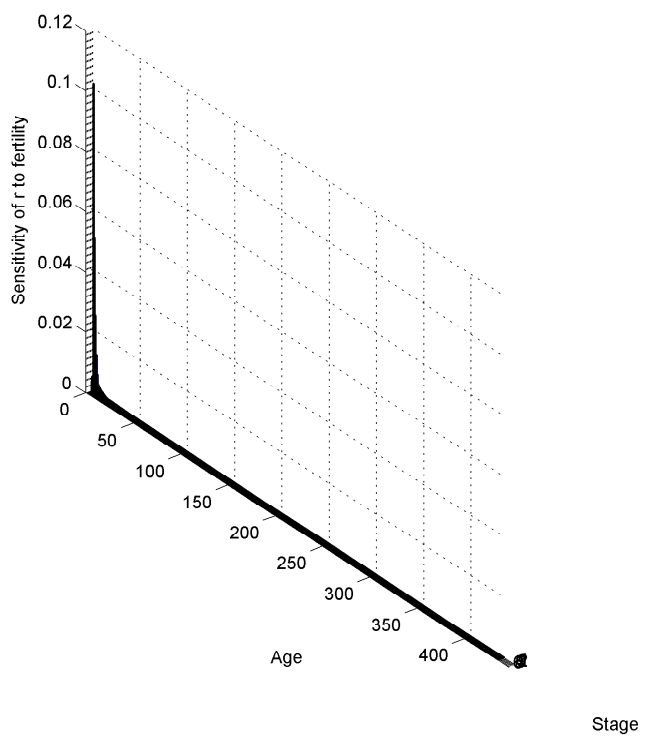

**Figure 8:** Selection gradients on age×stage-specific mortality and fertility.

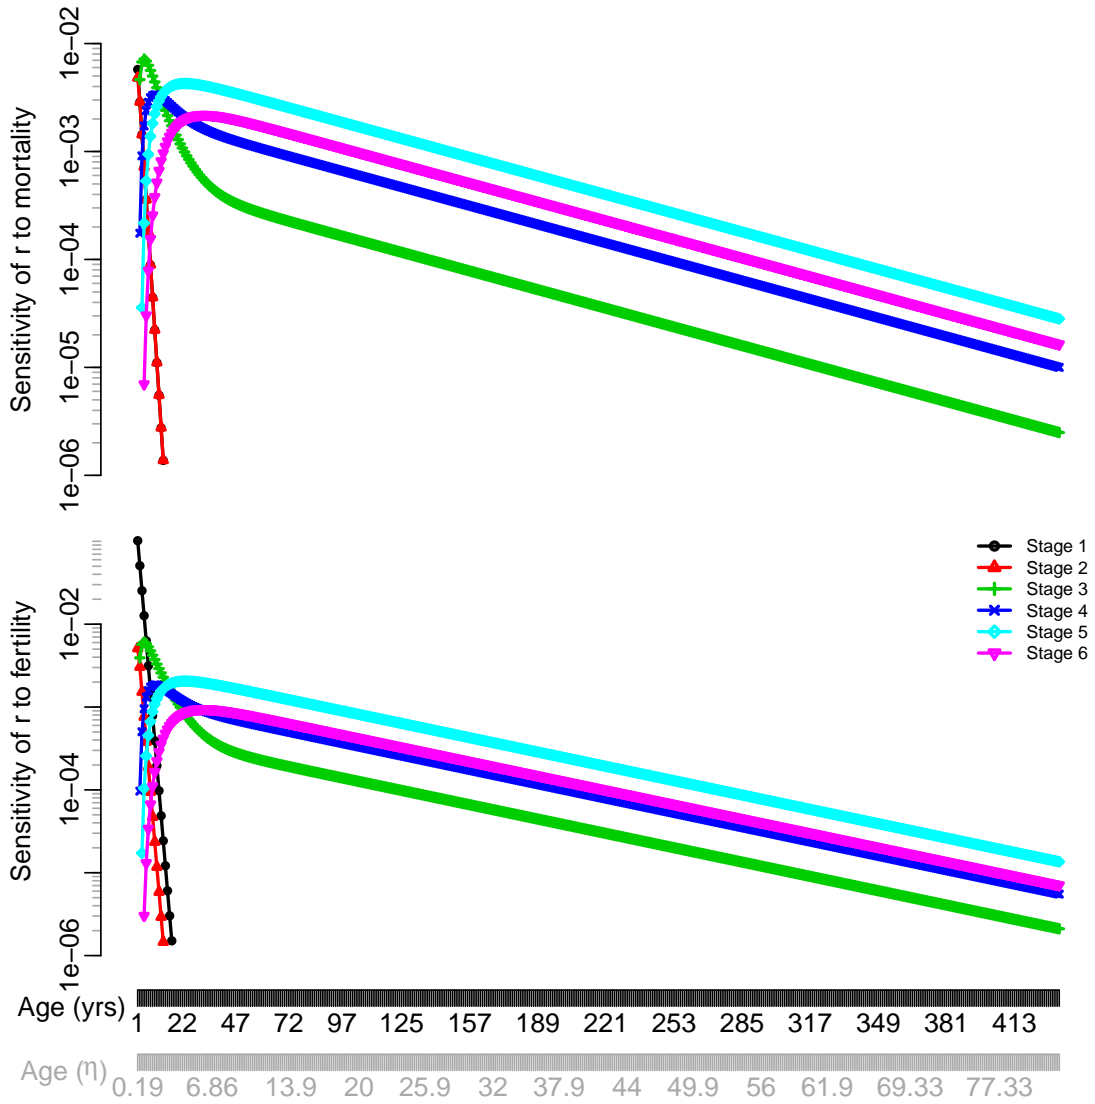

**Figure 9:** Selection gradients on age×stage-specific mortality and fertility. Top  $x$  axis represents age in years, whereas the bottom  $x$  axis represents time-scale normalized by the life expectancy ( $\eta$ ) of the first non-seedbank stage (FNSS) of the species.

### S1.4 *Calathea ovandensis*

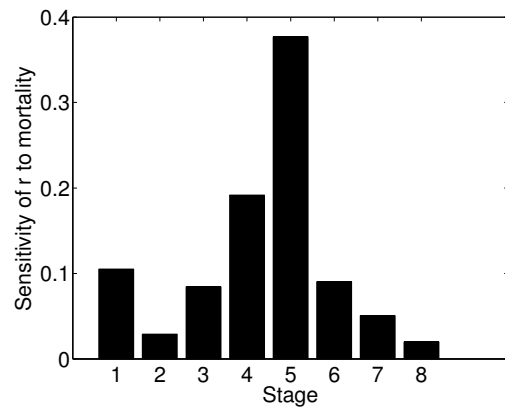

(a) Stage-specific mortality

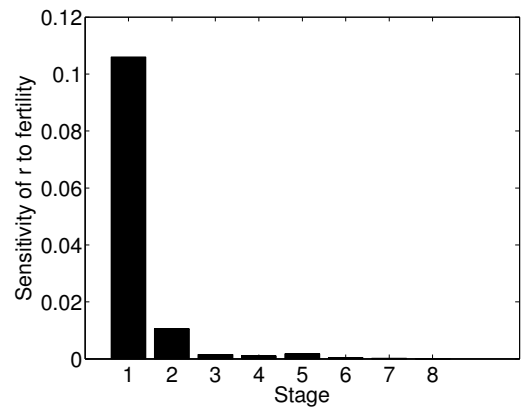

(b) Stage-specific fertility

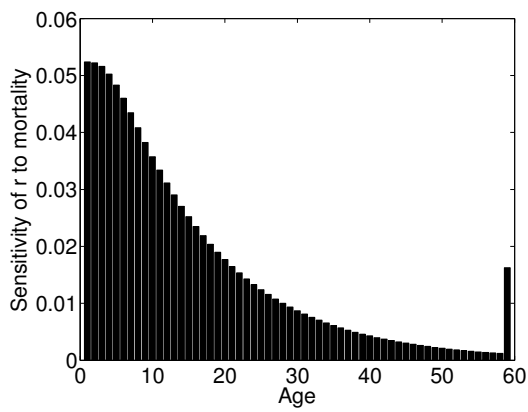

(c) Age-specific mortality

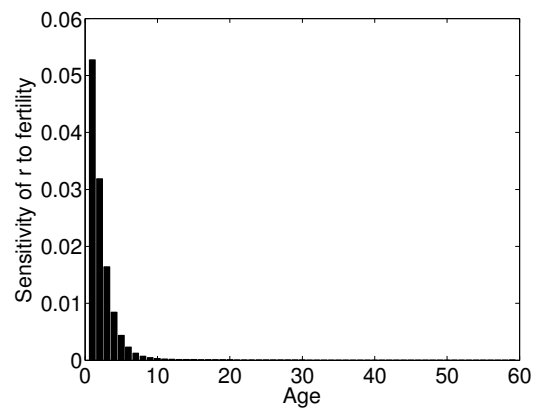

(d) Age-specific fertility

**Figure 10:** Selection gradients on age-specific and stage-specific mortality and fertility.



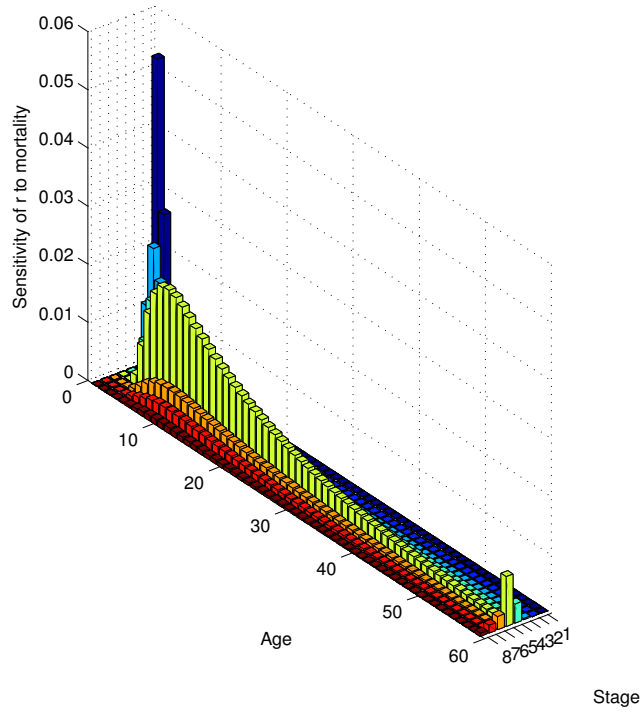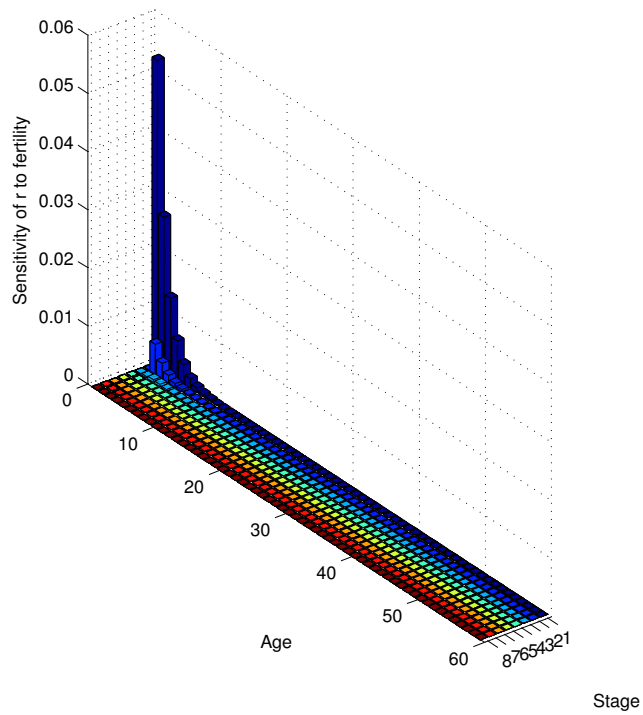

**Figure 11:** Selection gradients on age $\times$ stage-specific mortality and fertility.

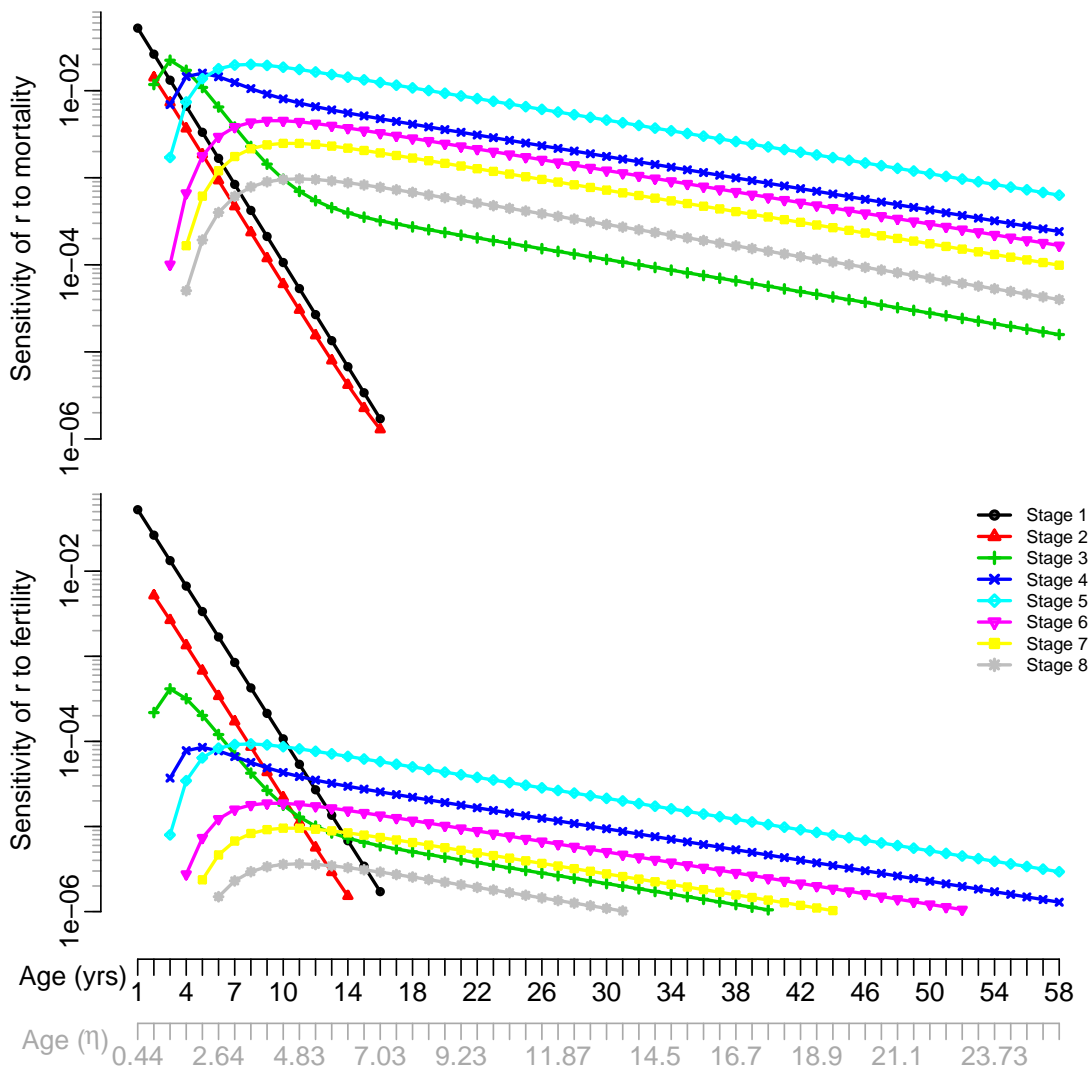

**Figure 12:** Selection gradients on age×stage-specific mortality and fertility. Top  $x$  axis represents age in years, whereas the bottom  $x$  axis represents time-scale normalized by the life expectancy ( $\eta$ ) of the first non-seedbank stage (FNSS) of the species.

S1.5 *Calathea micans*

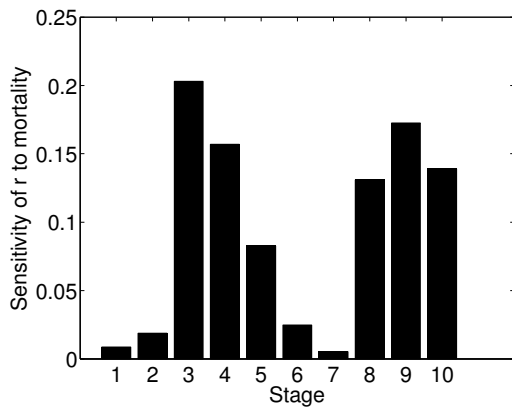

(a) Stage-specific mortality

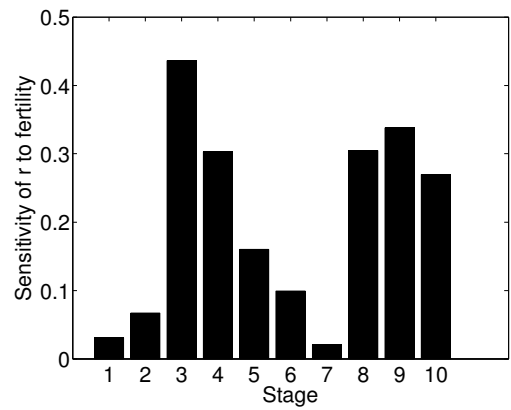

(b) Stage-specific fertility

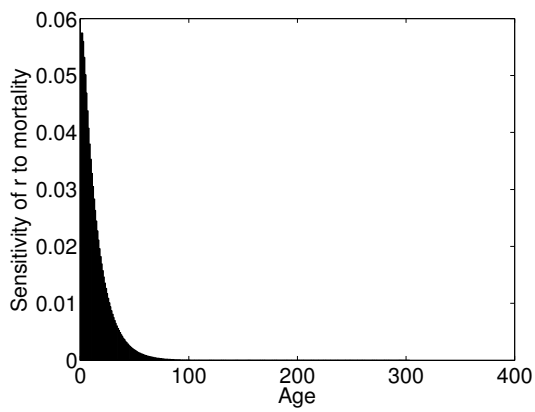

(c) Age-specific mortality

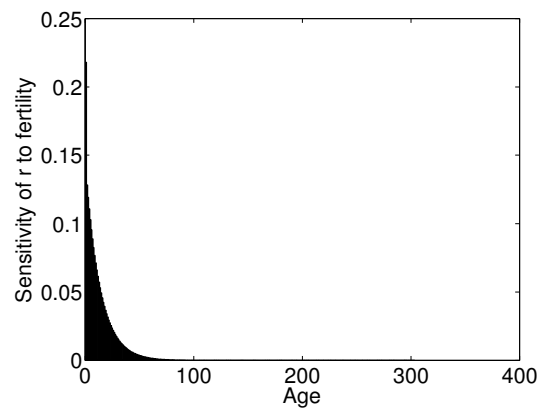

(d) Age-specific fertility

**Figure 13:** Selection gradients on age-specific and stage-specific mortality and fertility.

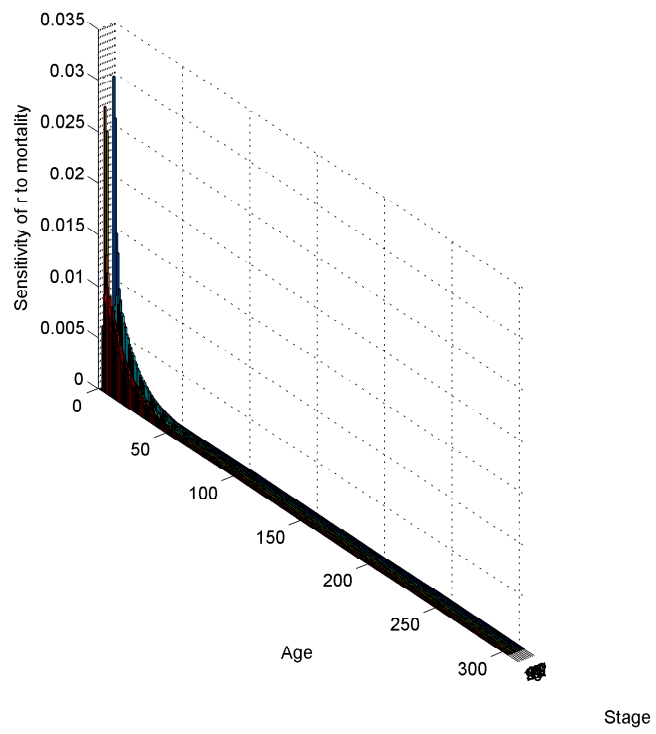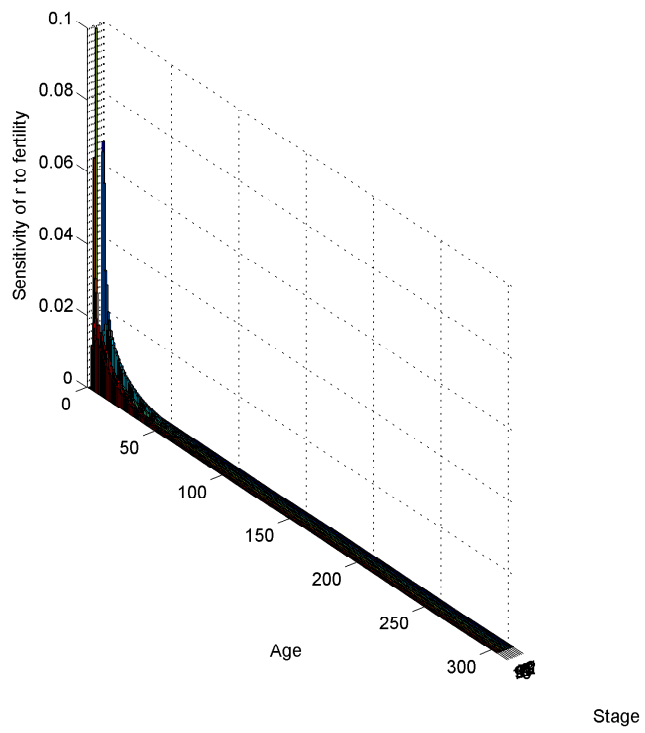

**Figure 14:** Selection gradients on age $\times$ stage-specific mortality and fertility.

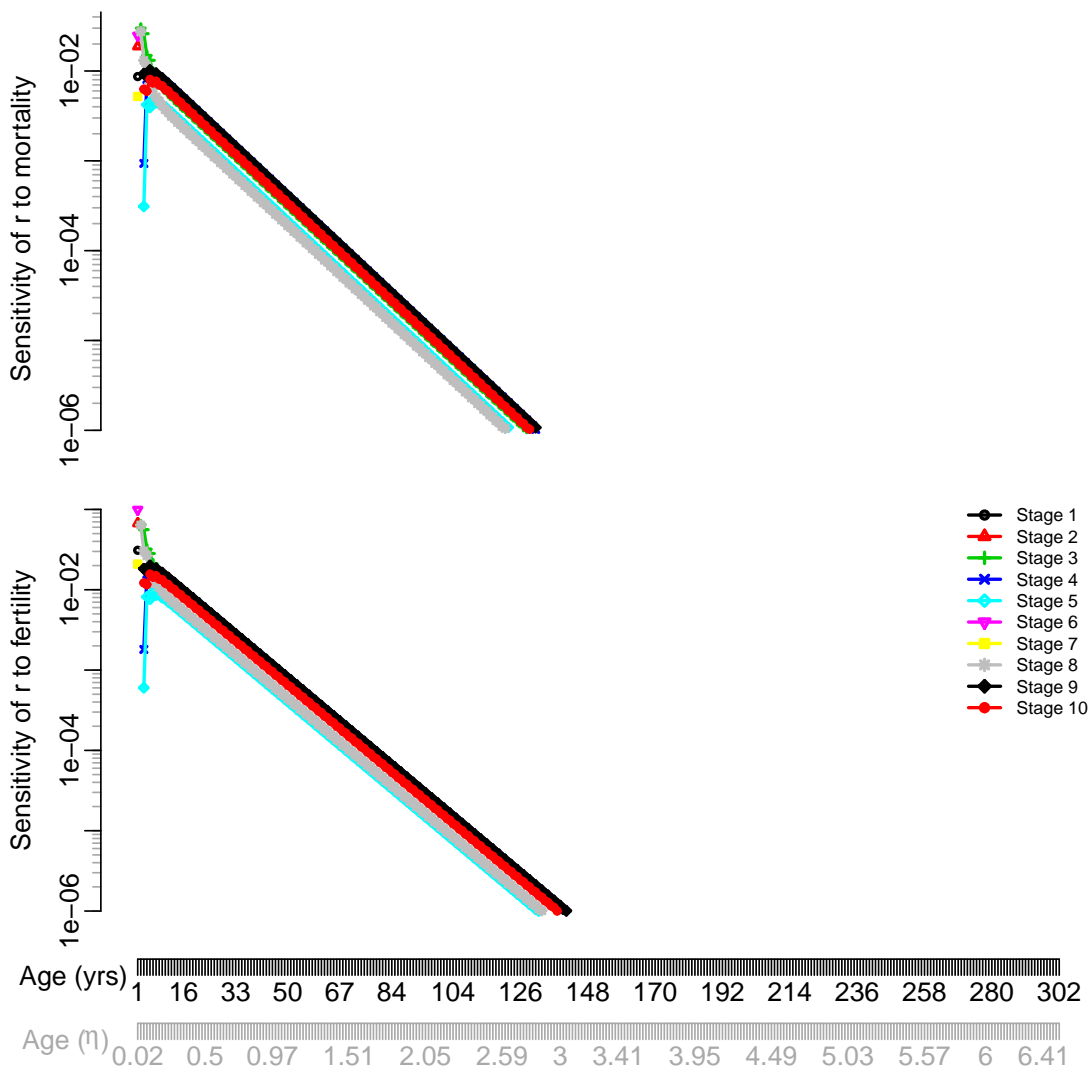

**Figure 15:** Selection gradients on age×stage-specific mortality and fertility. Top  $x$  axis represents age in years, whereas the bottom  $x$  axis represents time-scale normalized by the life expectancy ( $\eta$ ) of the first non-seedbank stage (FNSS) of the species.

## S1.6 *Calochortus lyallii*

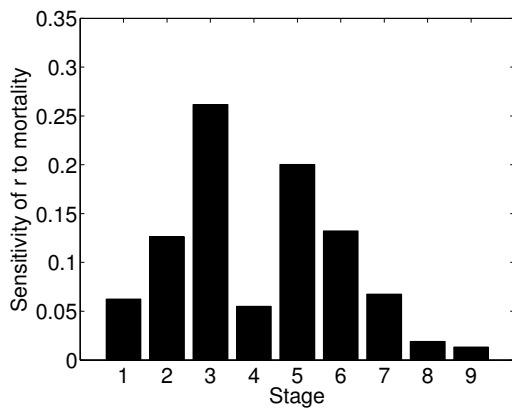

(a) Stage-specific mortality

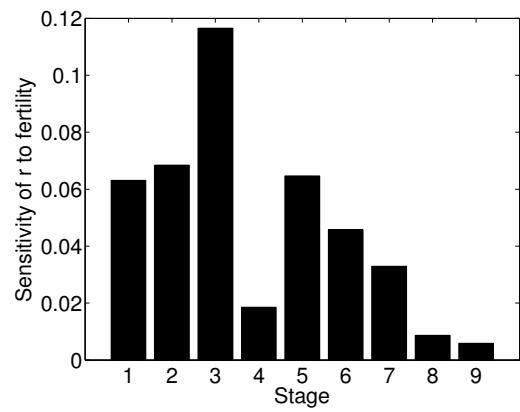

(b) Stage-specific fertility

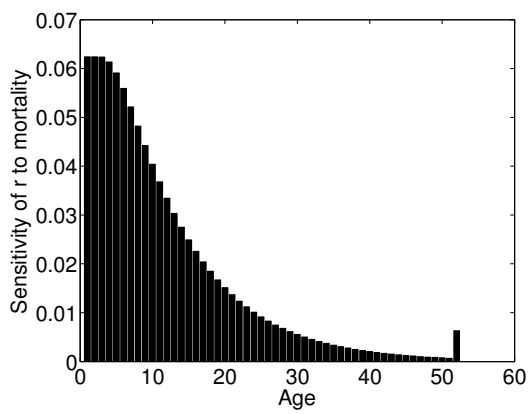

(c) Age-specific mortality

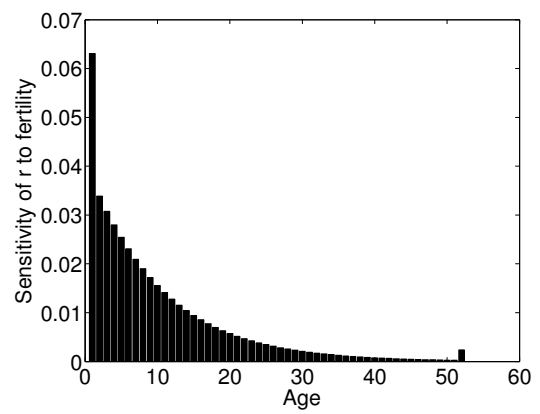

(d) Age-specific fertility

**Figure 16:** Selection gradients on age-specific and stage-specific mortality and fertility.

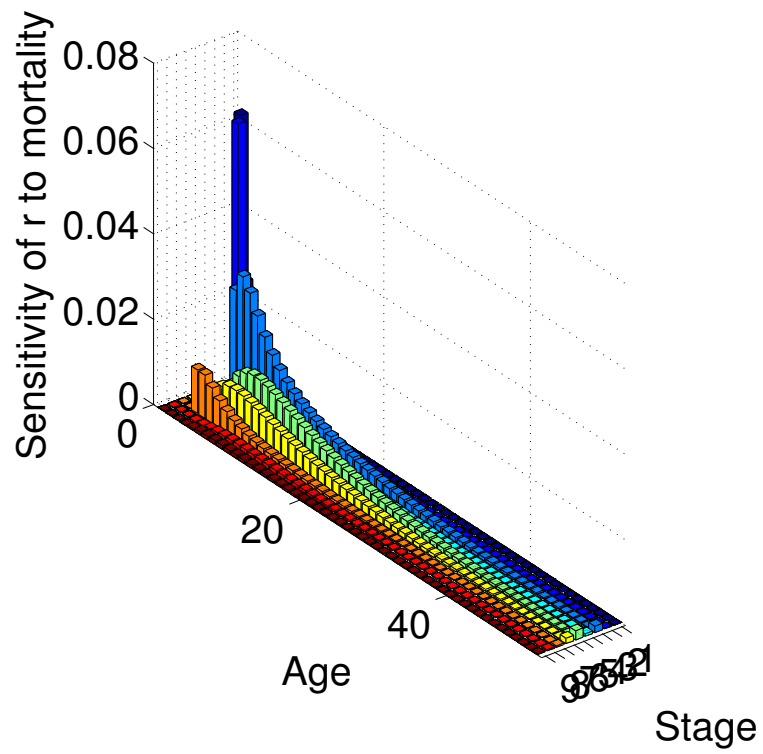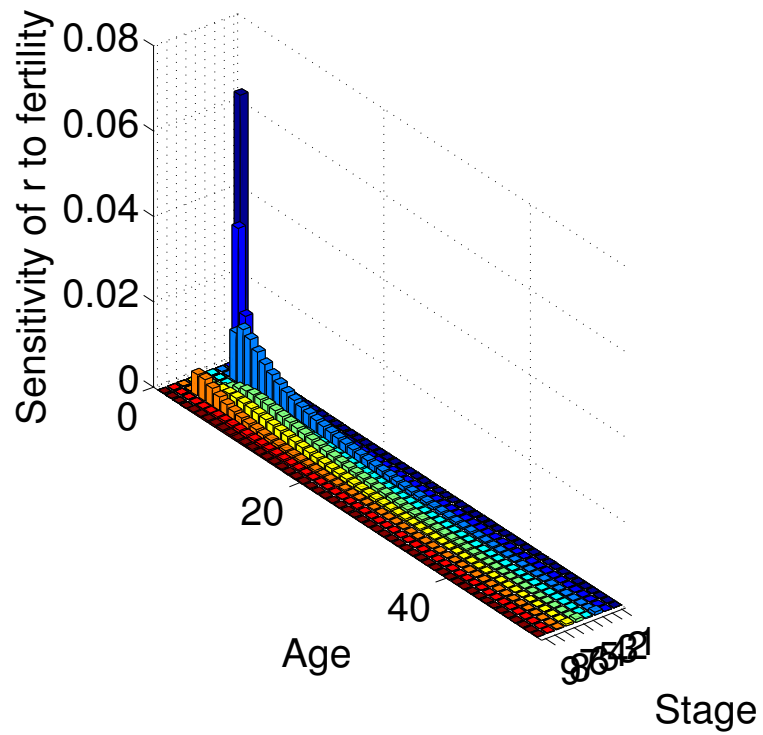

**Figure 17:** Selection gradients on age $\times$ stage-specific mortality and fertility.

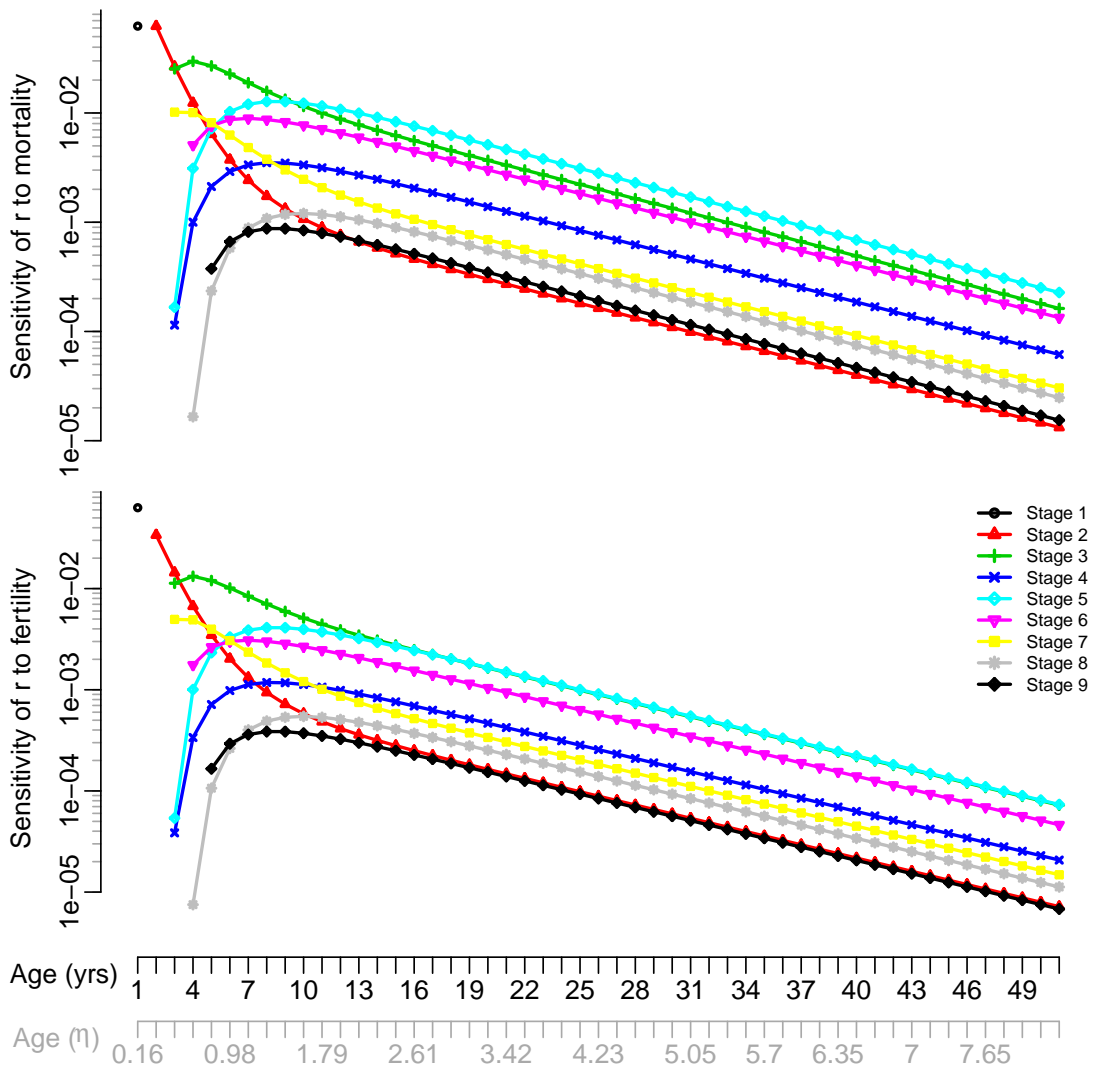

**Figure 18:** Selection gradients on age×stage-specific mortality and fertility. Top  $x$  axis represents age in years, whereas the bottom  $x$  axis represents time-scale normalized by the life expectancy ( $\eta$ ) of the first non-seedbank stage (FNSS) of the species.



### S1.7 *Chamaecrista keyensis*

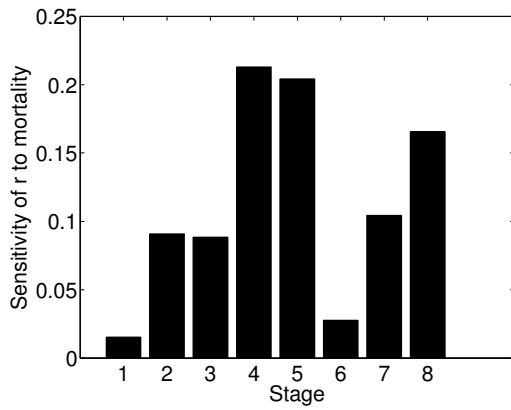

(a) Stage-specific mortality

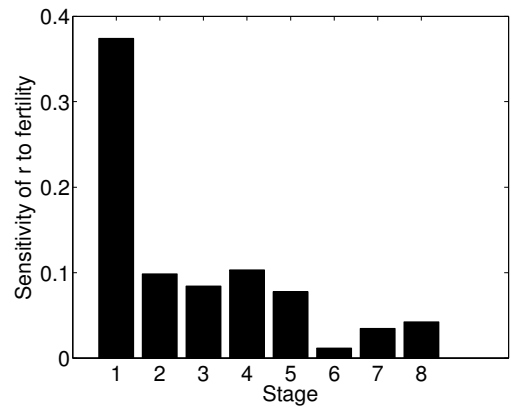

(b) Stage-specific fertility

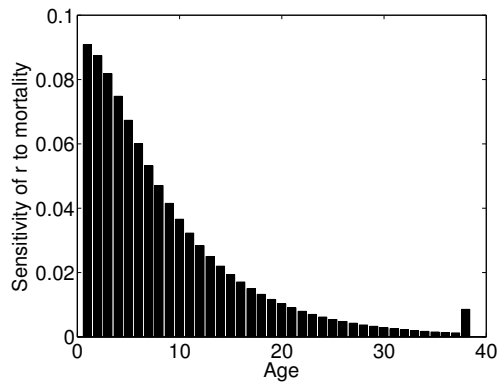

(c) Age-specific mortality

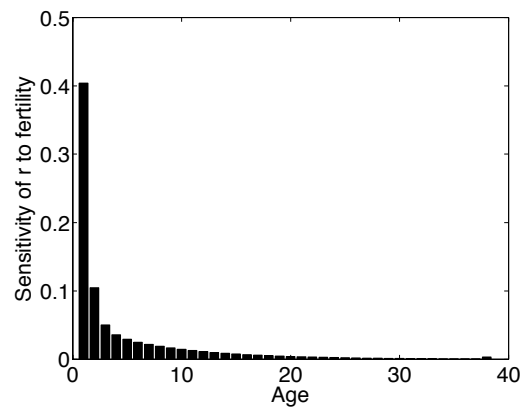

(d) Age-specific fertility

**Figure 19:** Selection gradients on age-specific and stage-specific mortality and fertility.

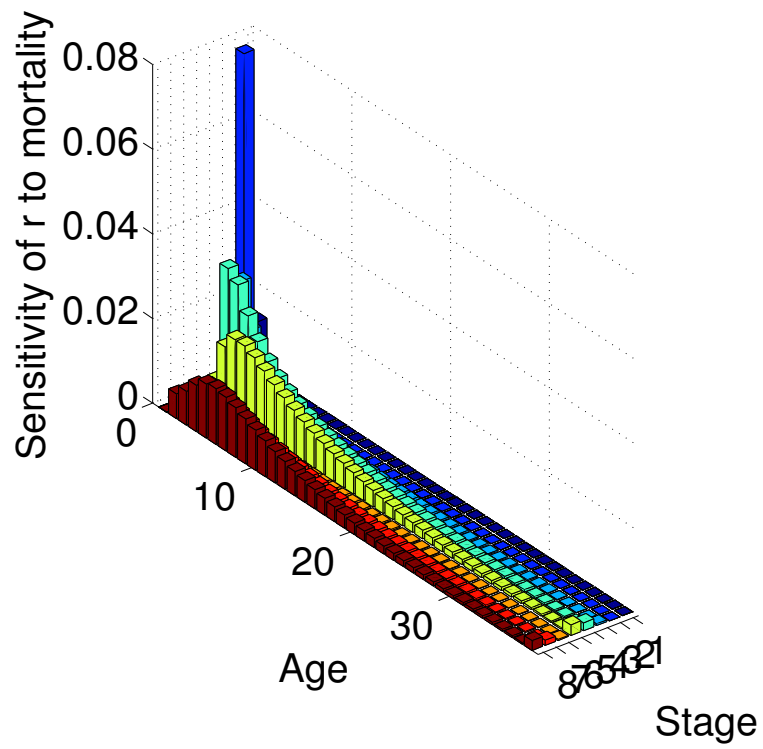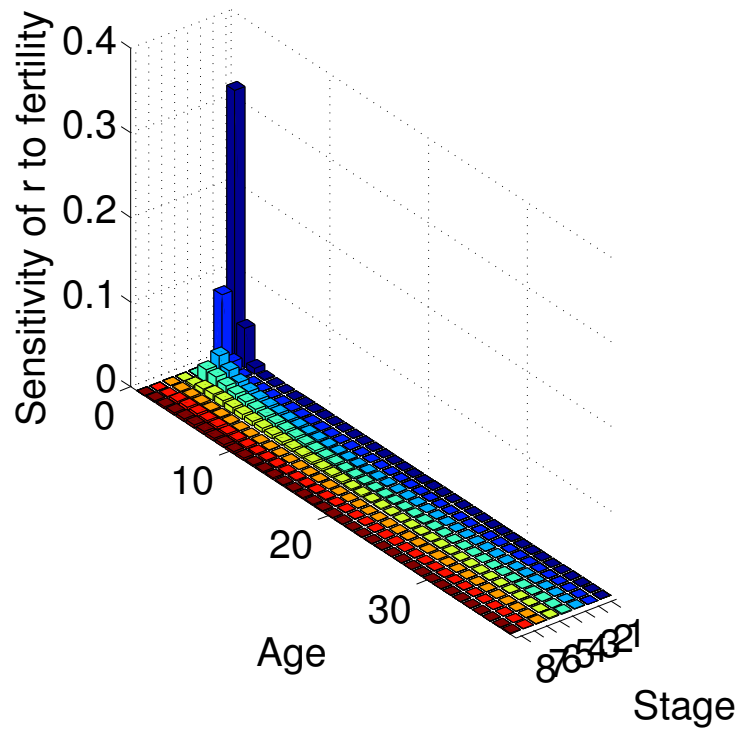

**Figure 20:** Selection gradients on age $\times$ stage-specific mortality and fertility.

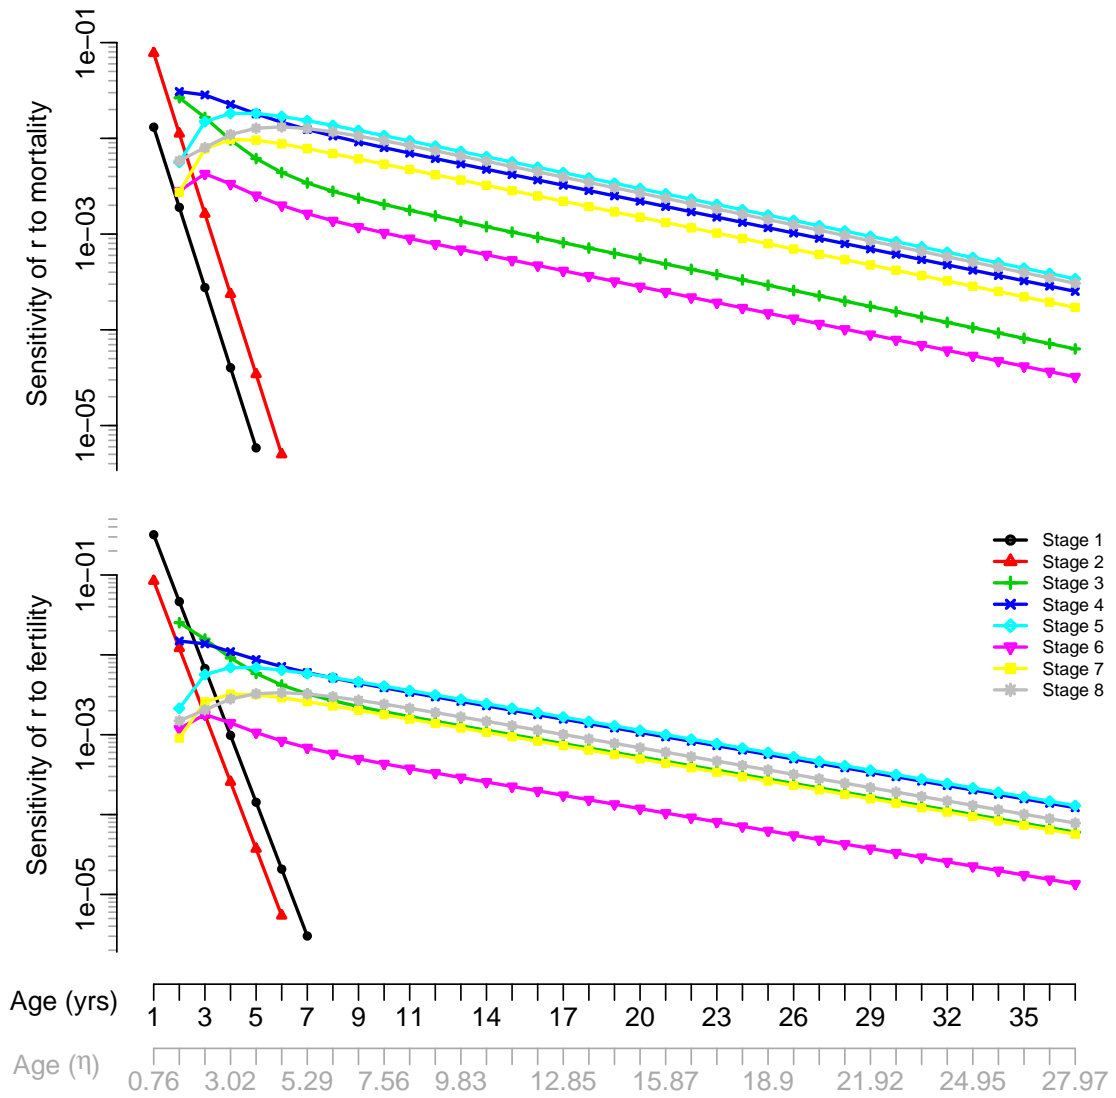

**Figure 21:** Selection gradients on age×stage-specific mortality and fertility. Top  $x$  axis represents age in years, whereas the bottom  $x$  axis represents time-scale normalized by the life expectancy ( $\eta$ ) of the first non-seedbank stage (FNSS) of the species.

S1.8 *Chamaelirium luteum*

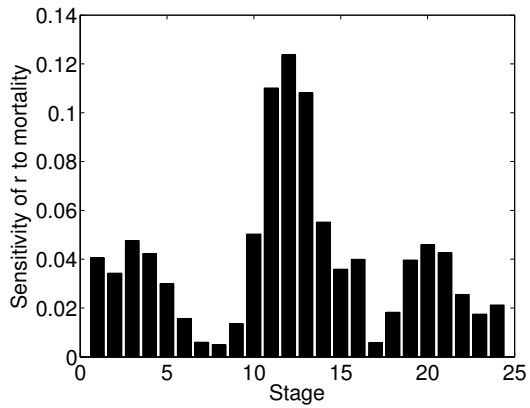

(a) Stage-specific mortality

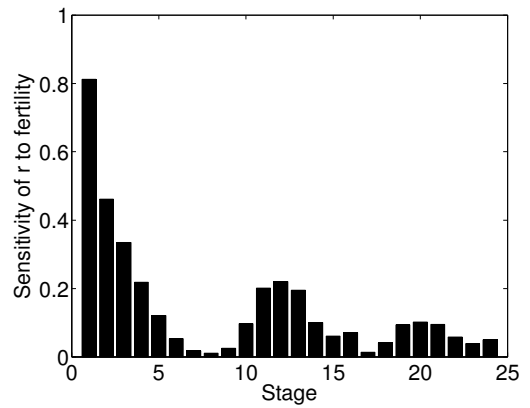

(b) Stage-specific fertility

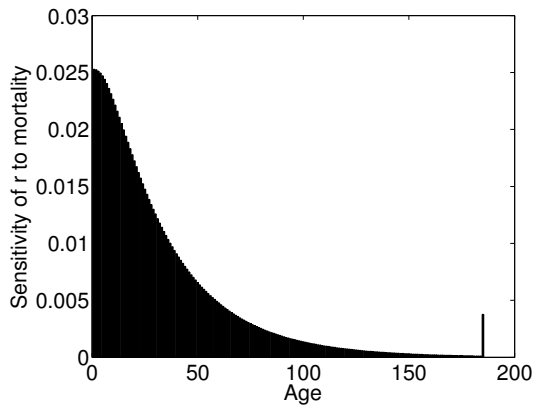

(c) Age-specific mortality

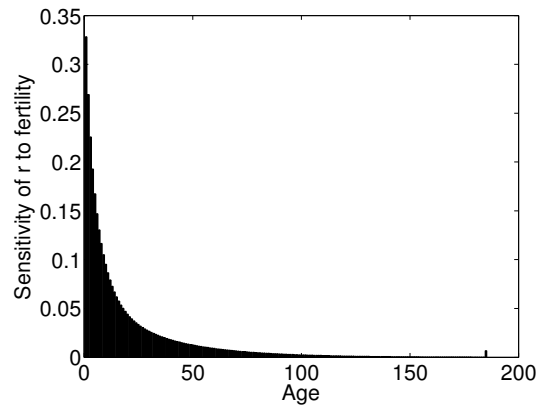

(d) Age-specific fertility

**Figure 22:** Selection gradients on age-specific and stage-specific mortality and fertility.

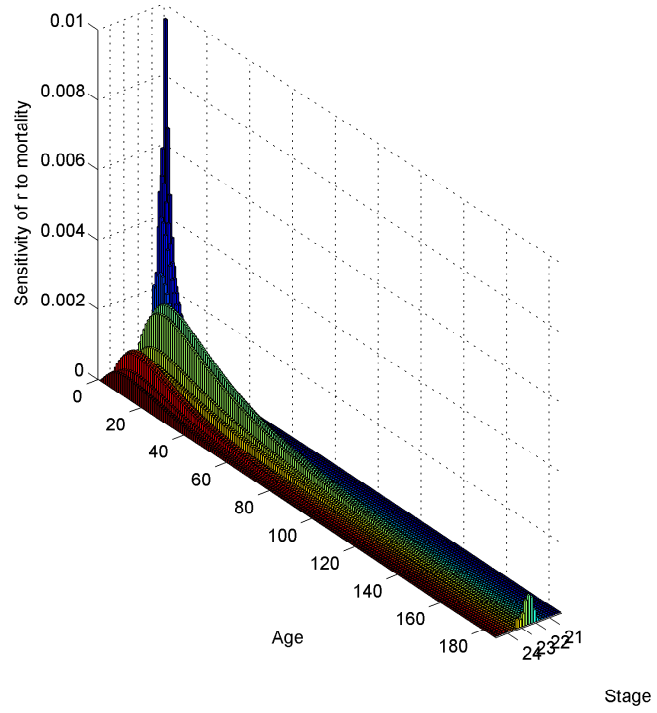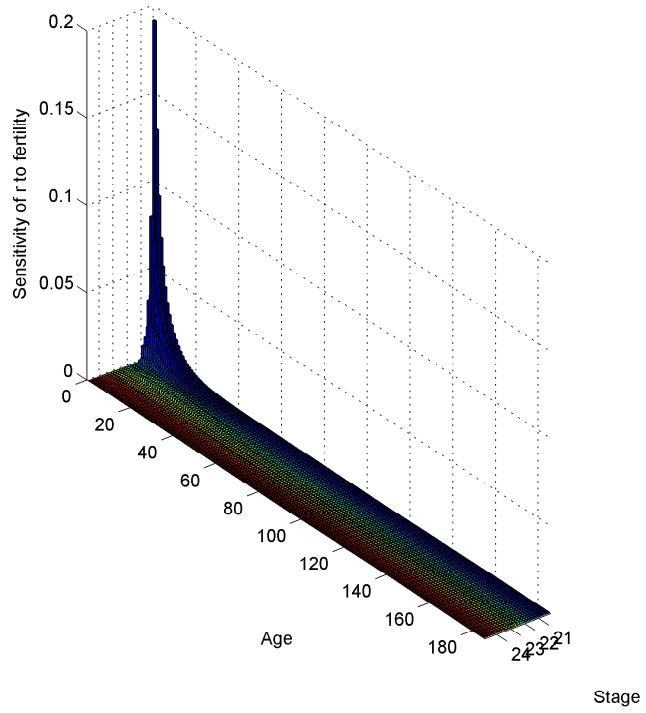

**Figure 23:** Selection gradients on age $\times$ stage-specific mortality and fertility.

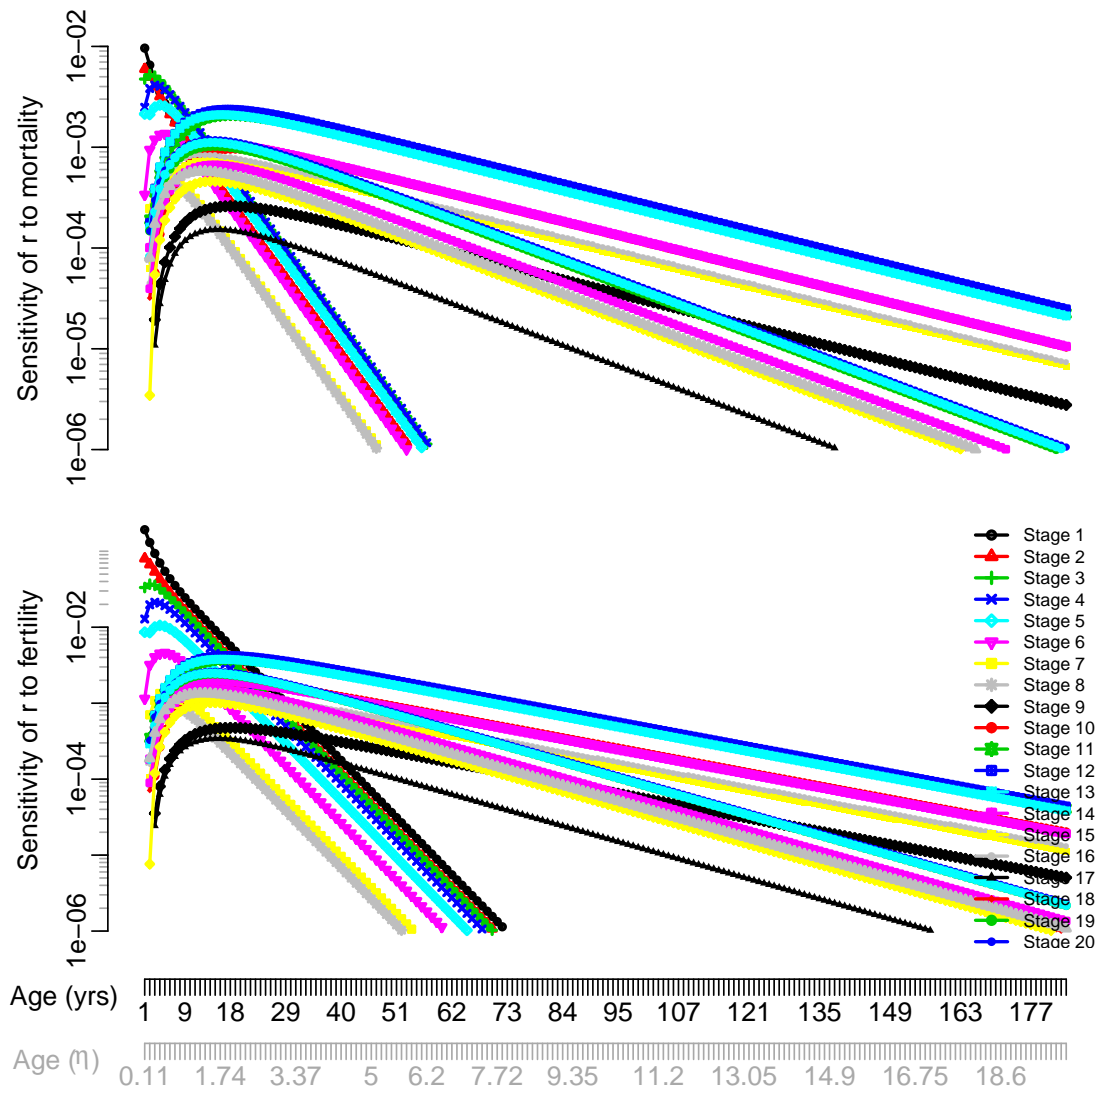

**Figure 24:** Selection gradients on age×stage-specific mortality and fertility. Top  $x$  axis represents age in years, whereas the bottom  $x$  axis represents time-scale normalized by the life expectancy ( $\eta$ ) of the first non-seedbank stage (FNSS) of the species.

### S1.9 *Cryptantha flava*

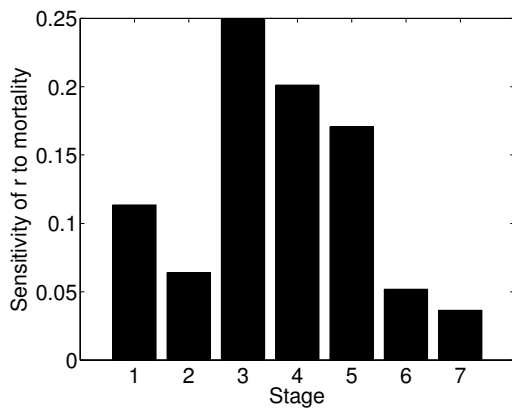

(a) Stage-specific mortality

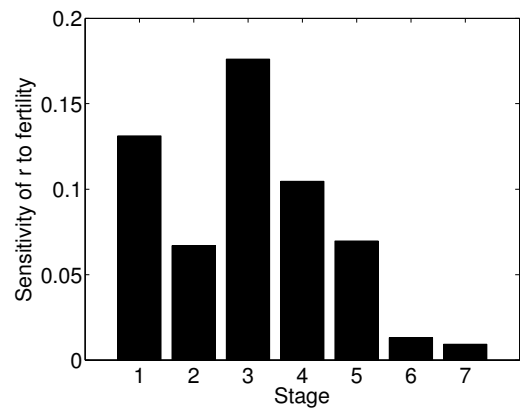

(b) Stage-specific fertility

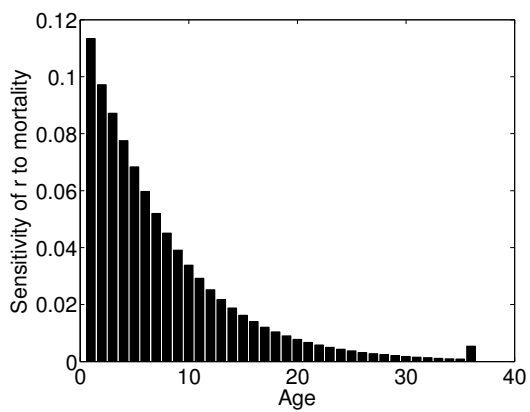

(c) Age-specific mortality

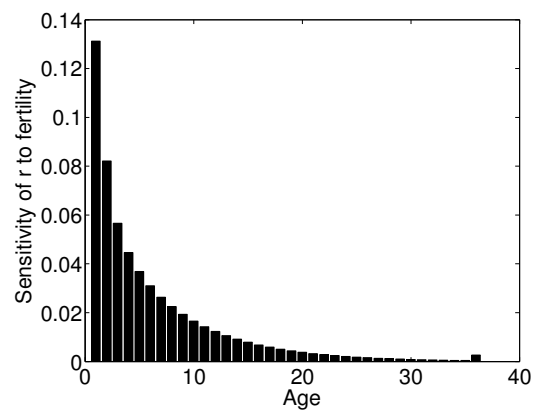

(d) Age-specific fertility

**Figure 25:** Selection gradients on age-specific and stage-specific mortality and fertility.

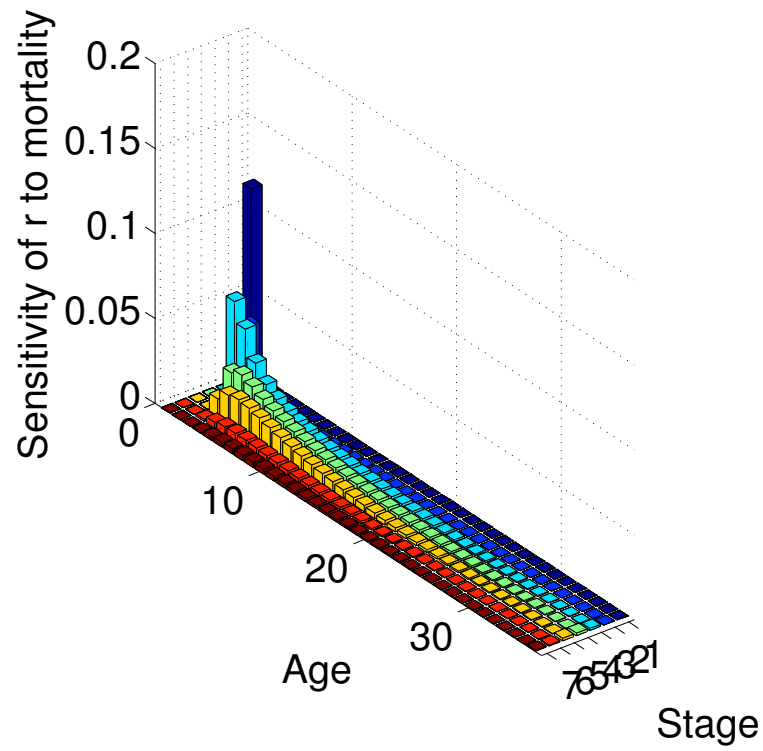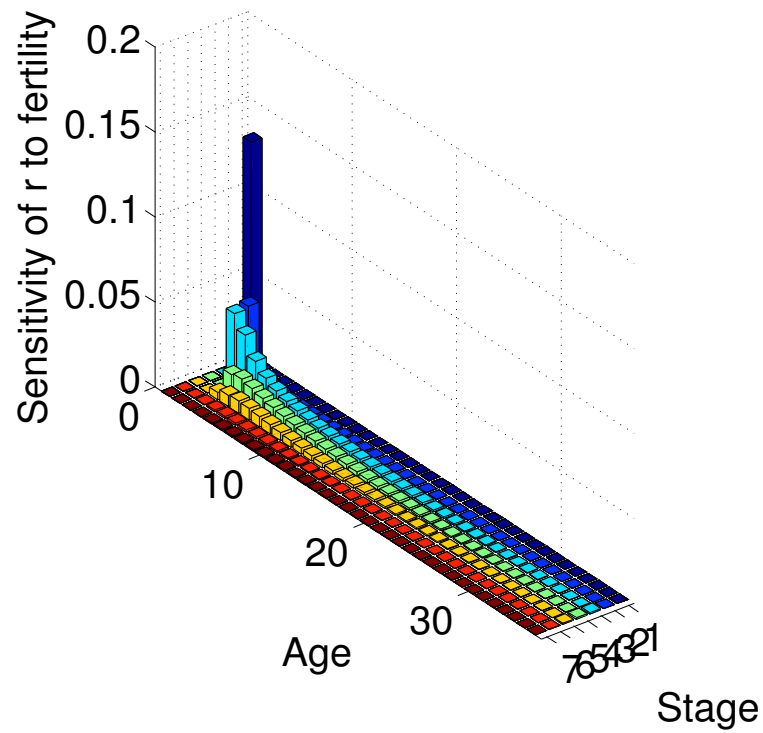

**Figure 26:** Selection gradients on age $\times$ stage-specific mortality and fertility.



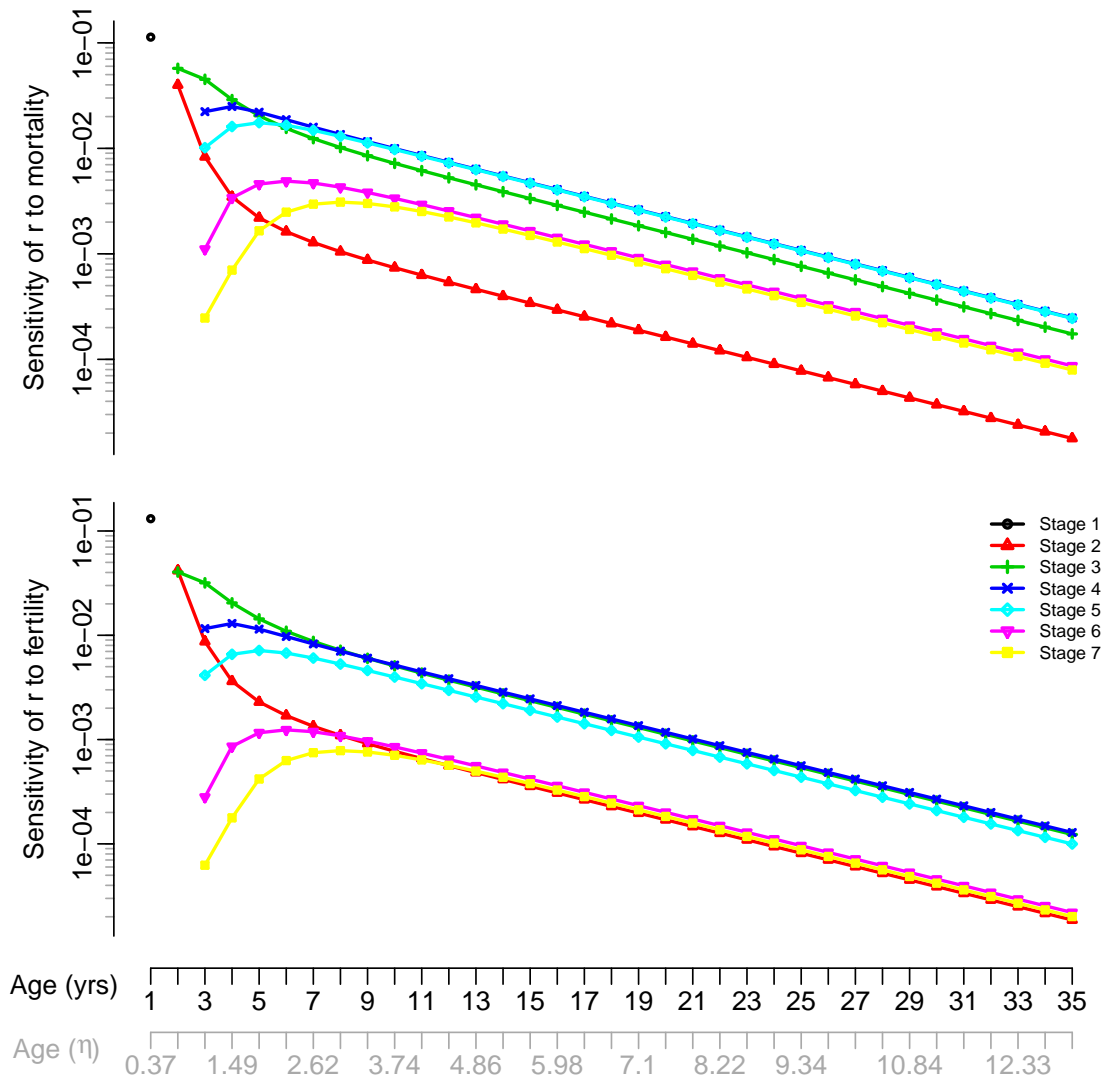

**Figure 27:** Selection gradients on age×stage-specific mortality and fertility. Top  $x$  axis represents age in years, whereas the bottom  $x$  axis represents time-scale normalized by the life expectancy ( $\eta$ ) of the first non-seedbank stage (FNSS) of the species.

S1.10 *Cytisus scoparius*

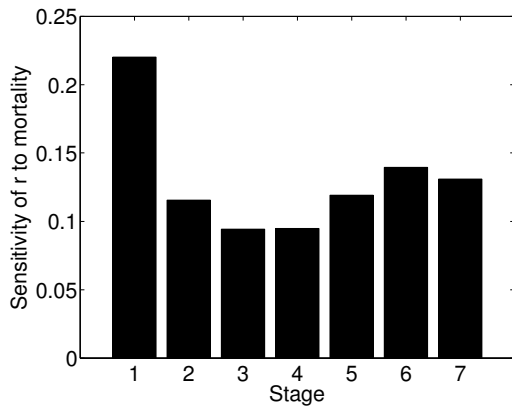

(a) Stage-specific mortality

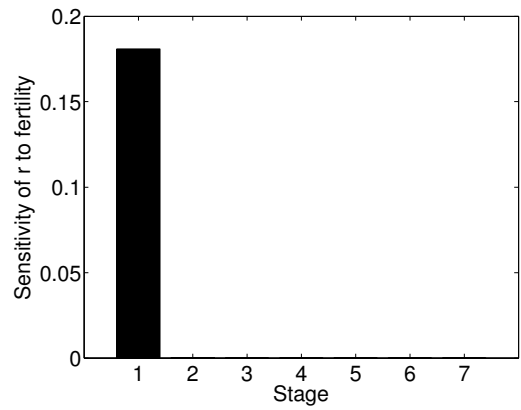

(b) Stage-specific fertility

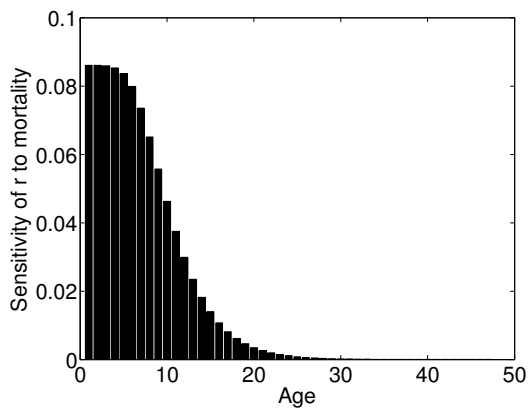

(c) Age-specific mortality

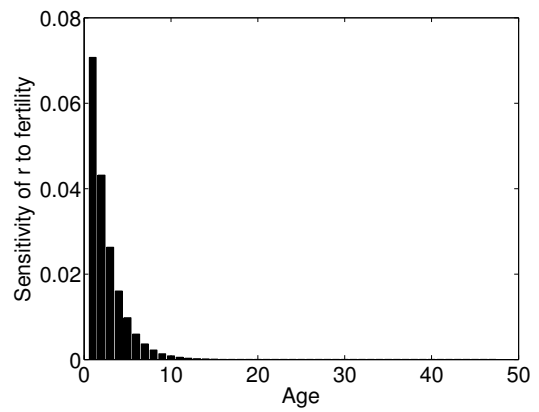

(d) Age-specific fertility

**Figure 28:** Selection gradients on age-specific and stage-specific mortality and fertility.

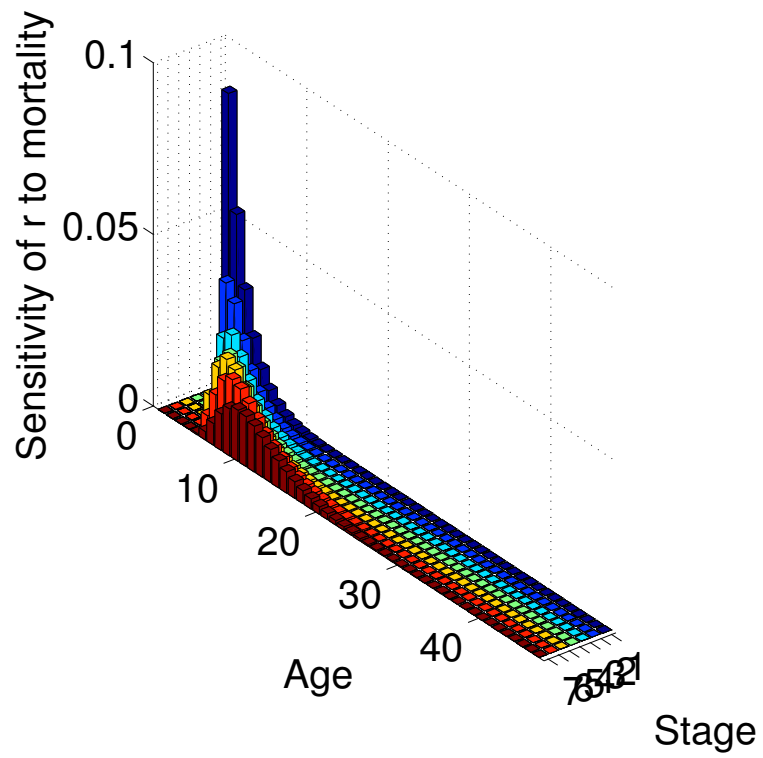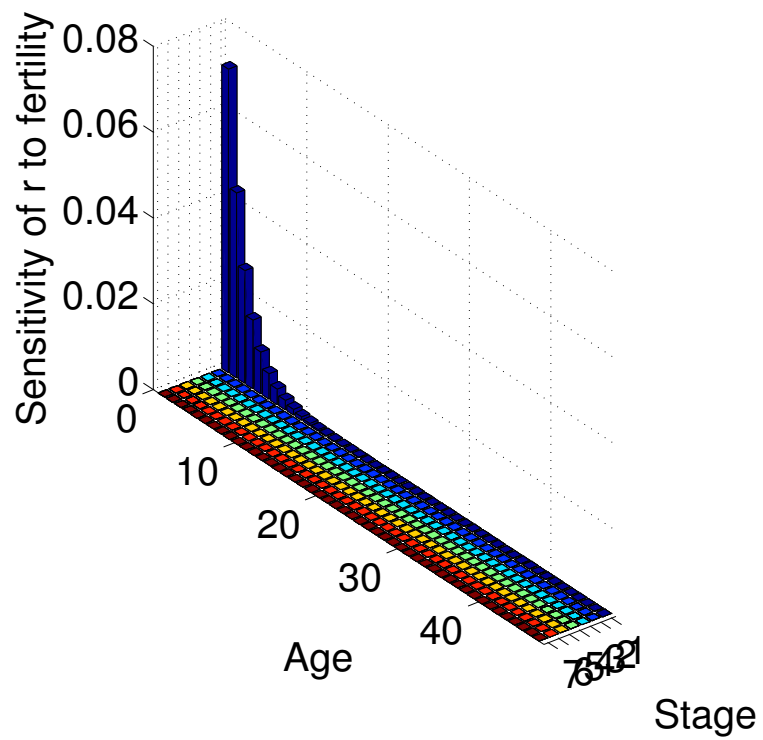

**Figure 29:** Selection gradients on age×stage-specific mortality and fertility.

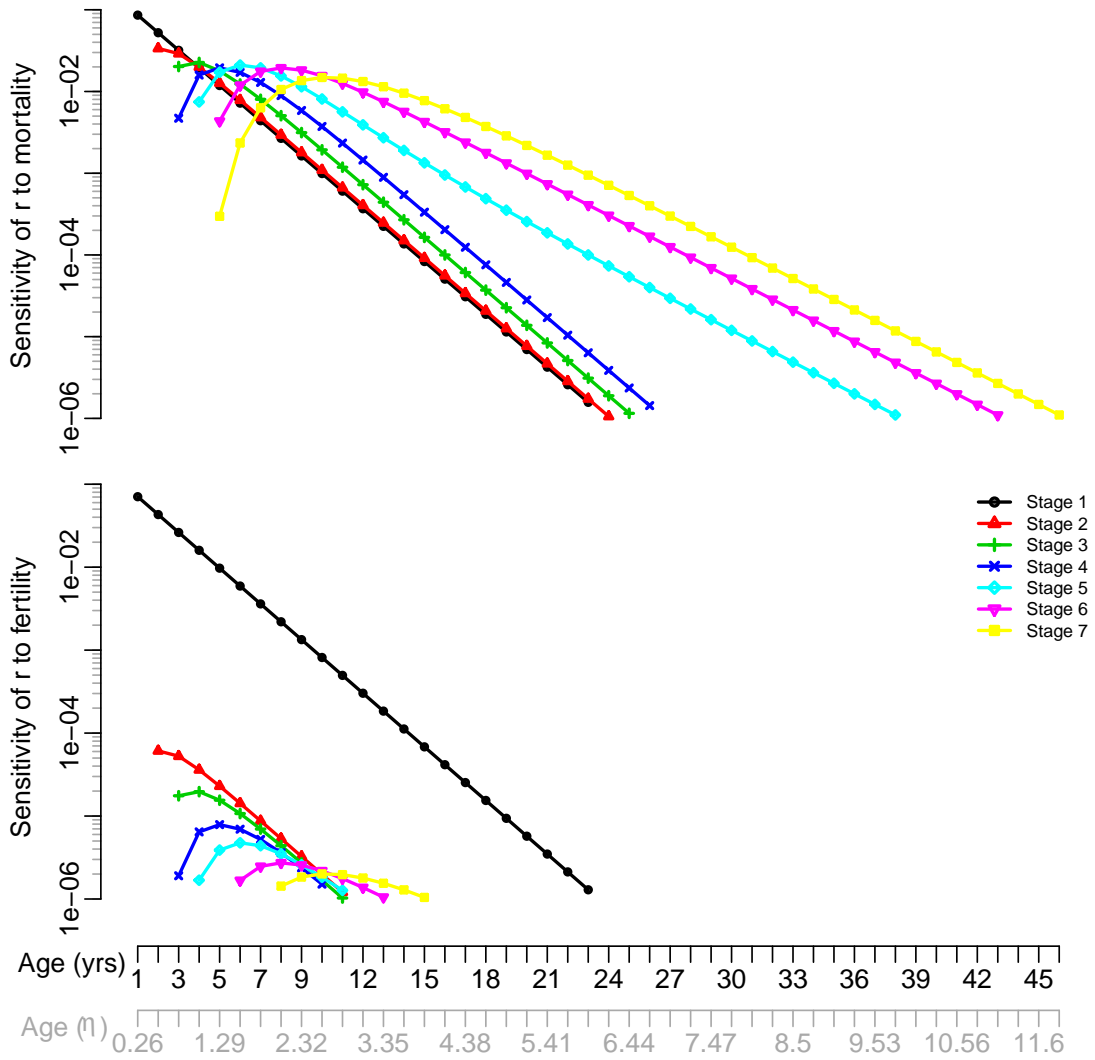

**Figure 30:** Selection gradients on age×stage-specific mortality and fertility. Top  $x$  axis represents age in years, whereas the bottom  $x$  axis represents time-scale normalized by the life expectancy ( $\eta$ ) of the first non-seedbank stage (FNSS) of the species.

S1.11 *Dicerandra frutescens*

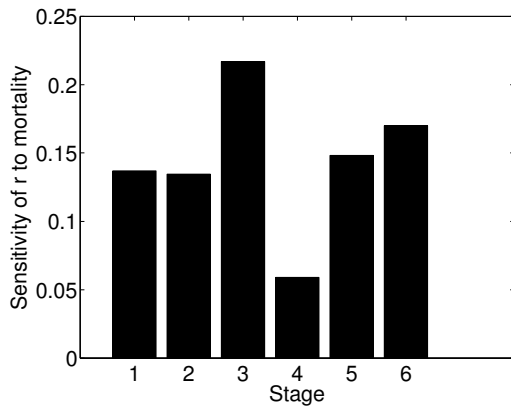

(a) Stage-specific mortality

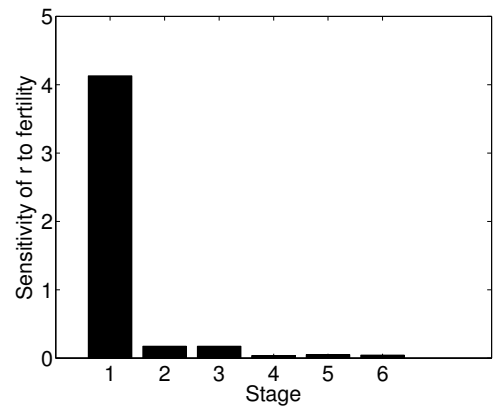

(b) Stage-specific fertility

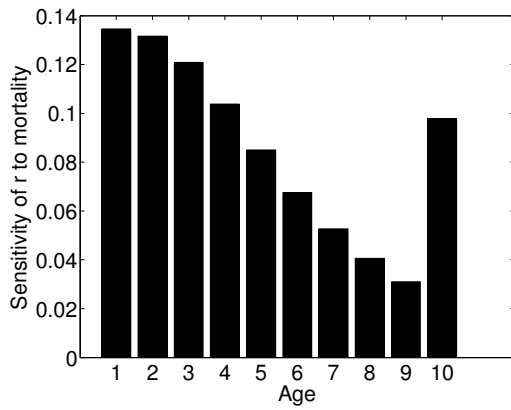

(c) Age-specific mortality

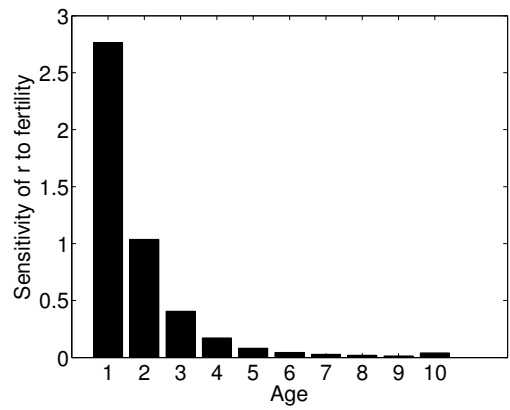

(d) Age-specific fertility

**Figure 31:** Selection gradients on age-specific and stage-specific mortality and fertility.

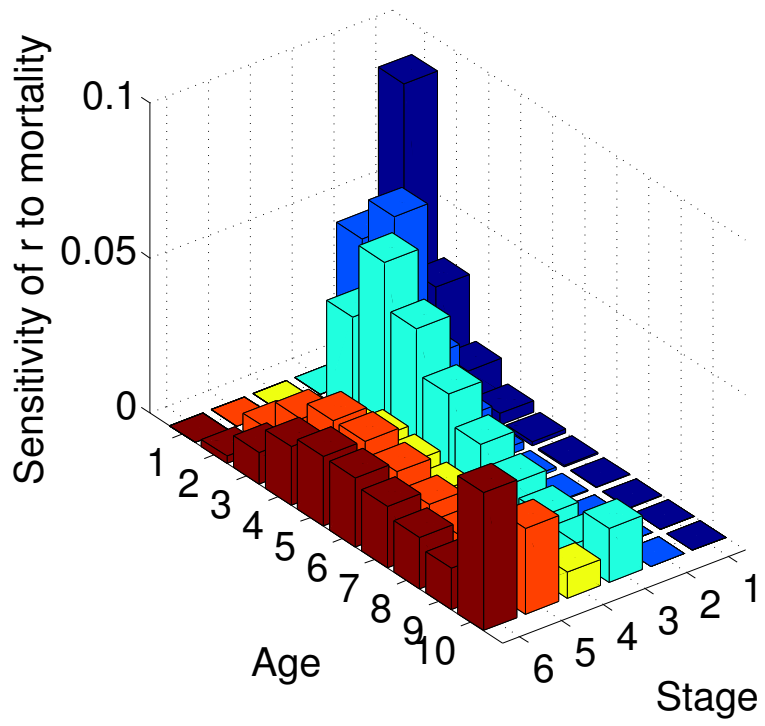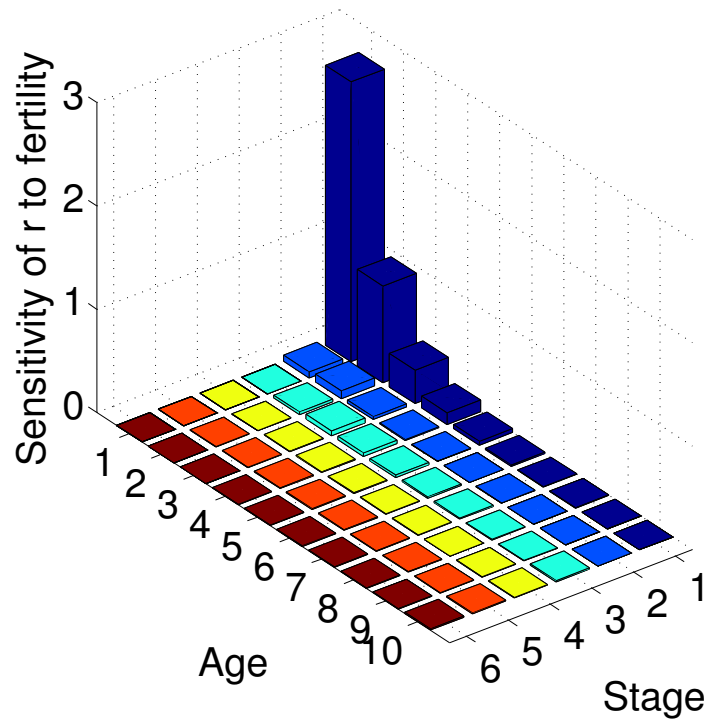

**Figure 32:** Selection gradients on age $\times$ stage-specific mortality and fertility.

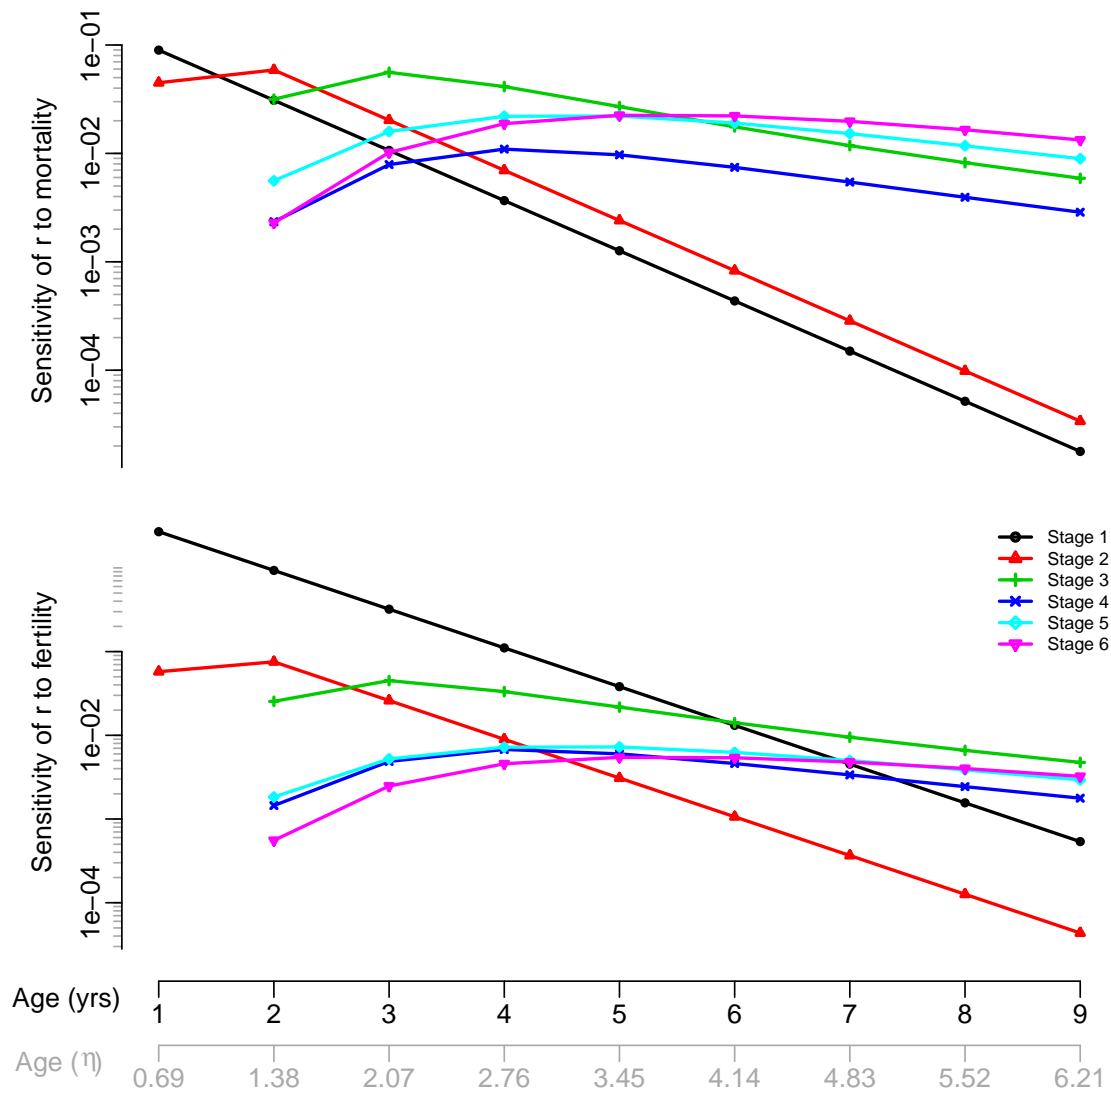

**Figure 33:** Selection gradients on age $\times$ stage-specific mortality and fertility. Top  $x$  axis represents age in years, whereas the bottom  $x$  axis represents time-scale normalized by the life expectancy ( $\eta$ ) of the first non-seedbank stage (FNSS) of the species.

S1.12 *Dicymbe altsonii*

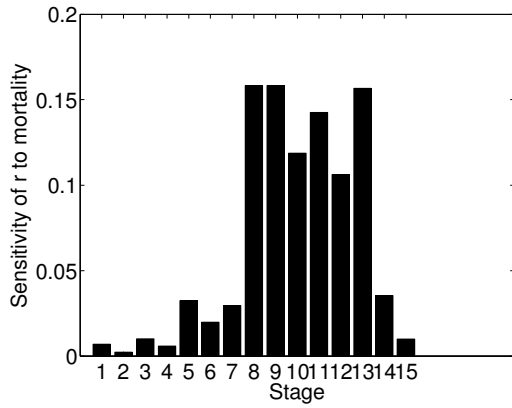

(a) Stage-specific mortality

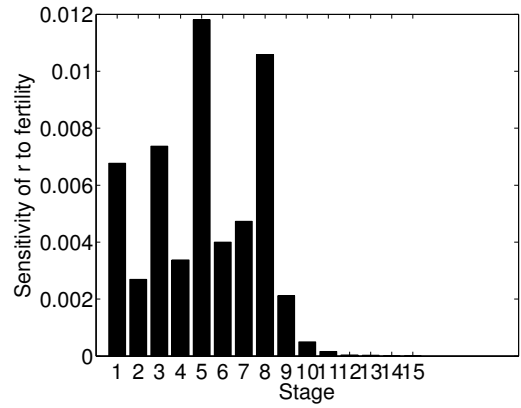

(b) Stage-specific fertility

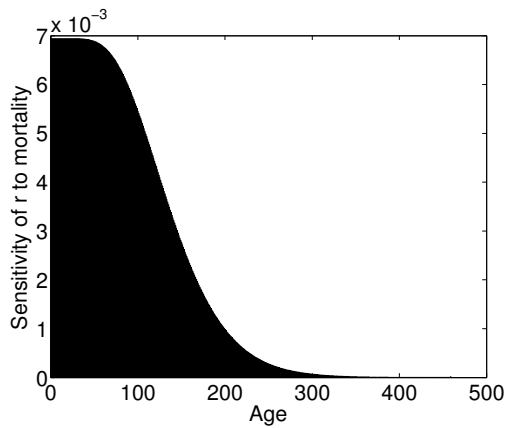

(c) Age-specific mortality

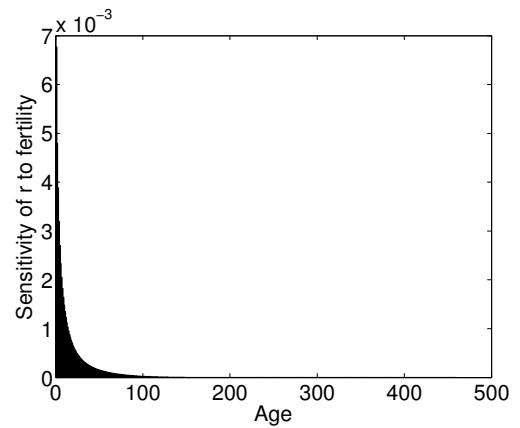

(d) Age-specific fertility

**Figure 34:** Selection gradients on age-specific and stage-specific mortality and fertility.



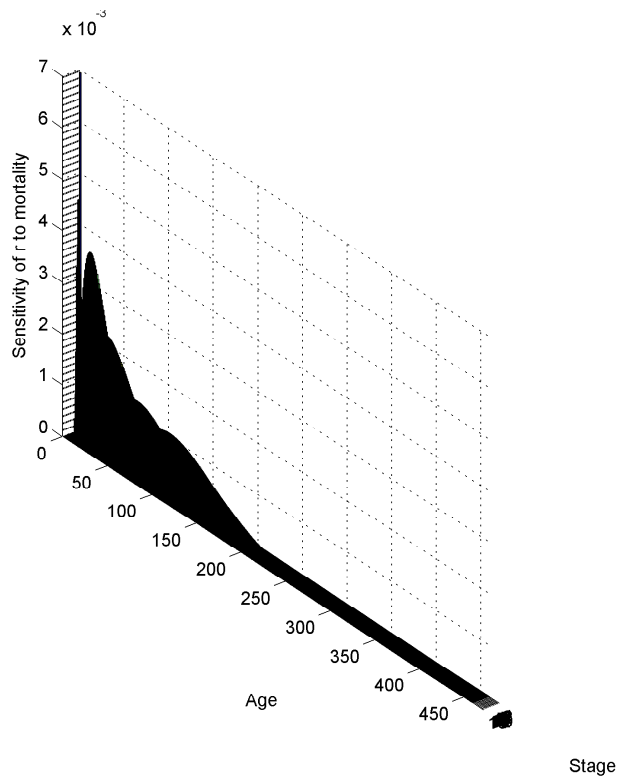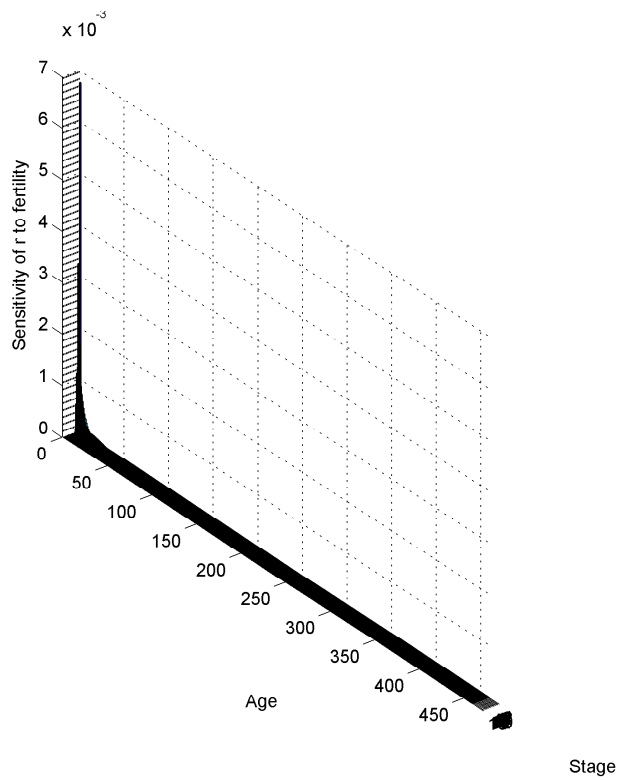

**Figure 35:** Selection gradients on age $\times$ stage-specific mortality and fertility.

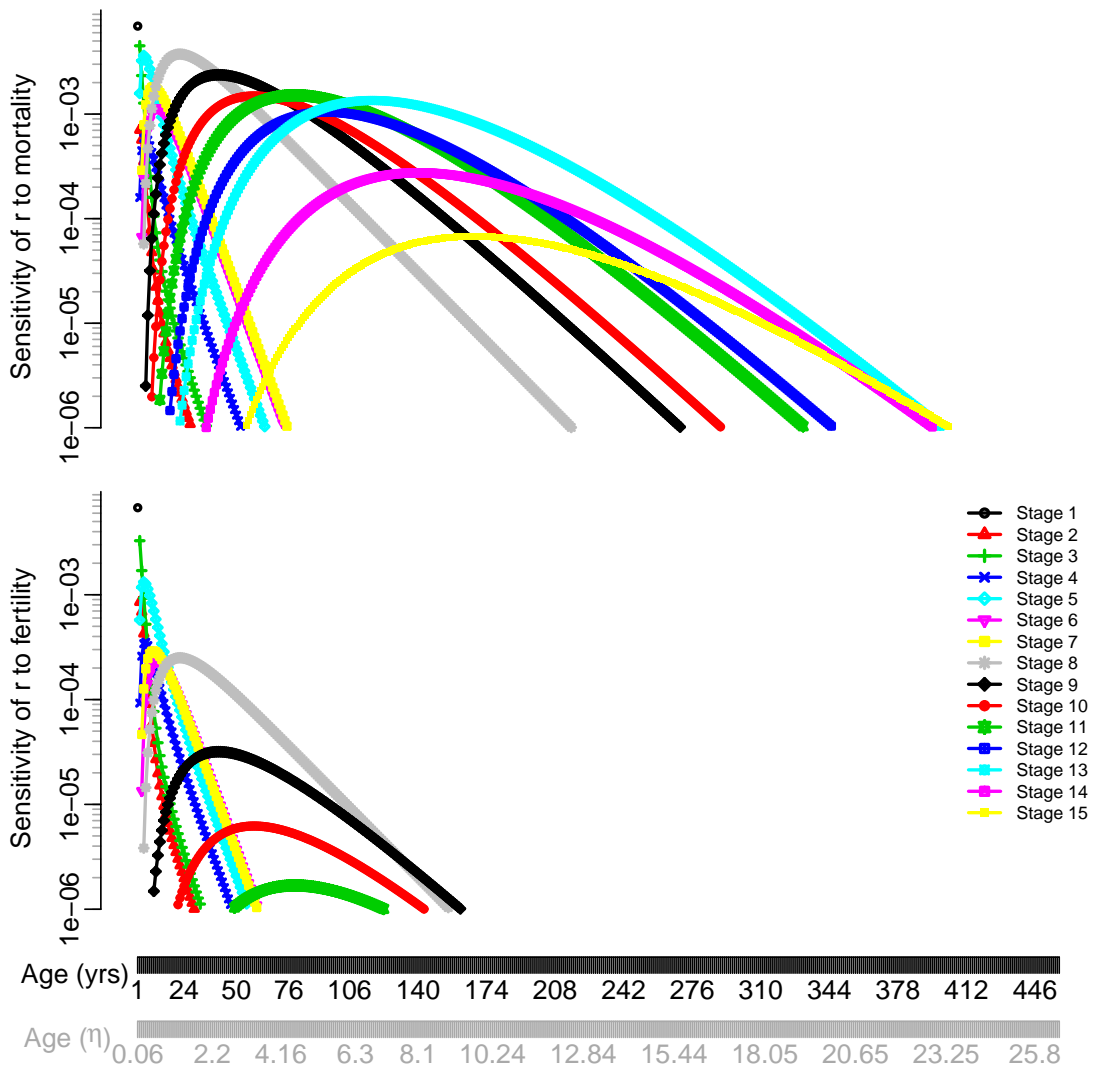

**Figure 36:** Selection gradients on age×stage-specific mortality and fertility. Top  $x$  axis represents age in years, whereas the bottom  $x$  axis represents time-scale normalized by the life expectancy ( $\eta$ ) of the first non-seedbank stage (FNSS) of the species.

S1.13 *Geonoma macrostachys*

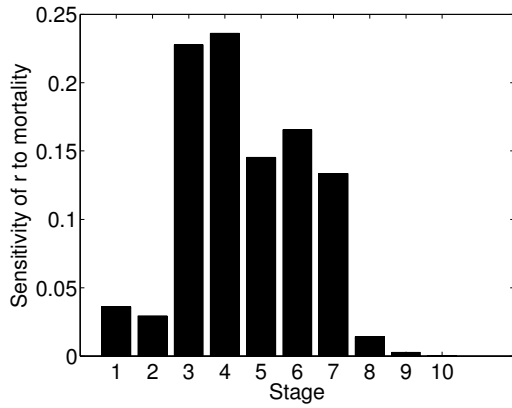

(a) Stage-specific mortality

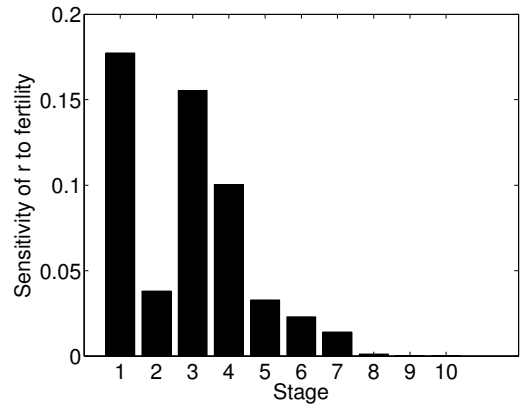

(b) Stage-specific fertility

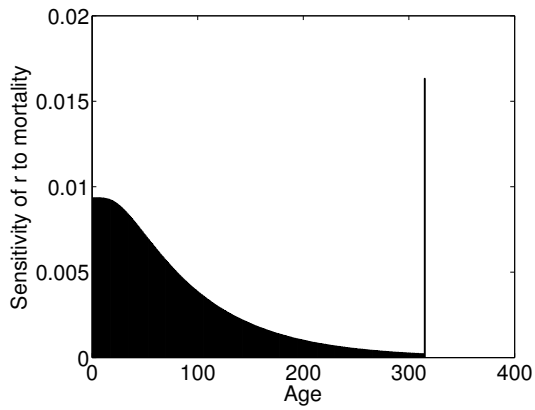

(c) Age-specific mortality

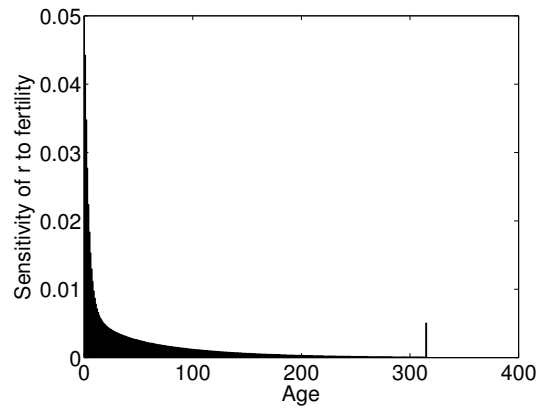

(d) Age-specific fertility

**Figure 37:** Selection gradients on age-specific and stage-specific mortality and fertility.

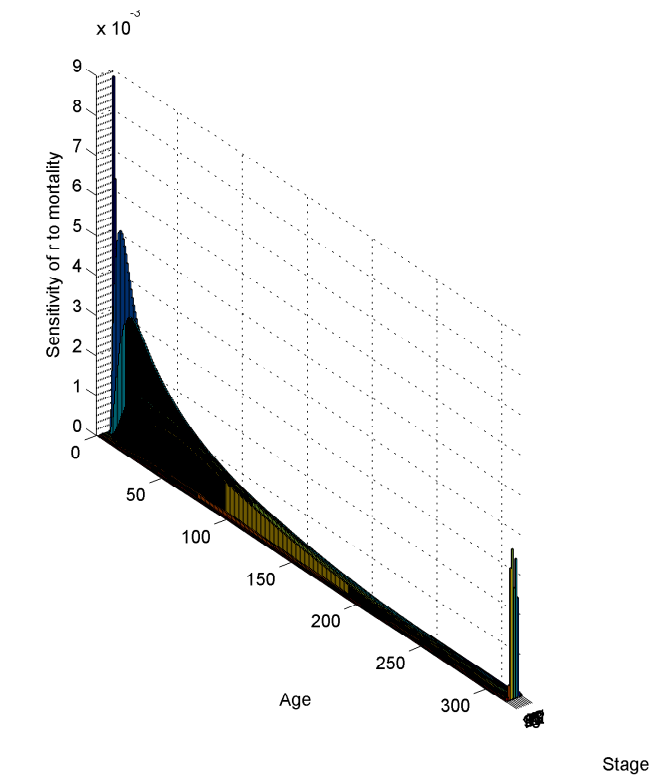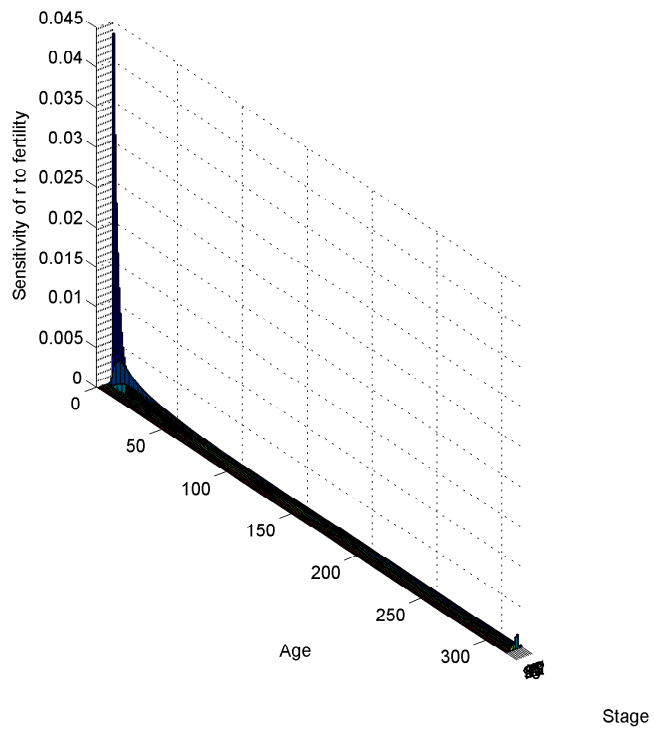

**Figure 38:** Selection gradients on age $\times$ stage-specific mortality and fertility.

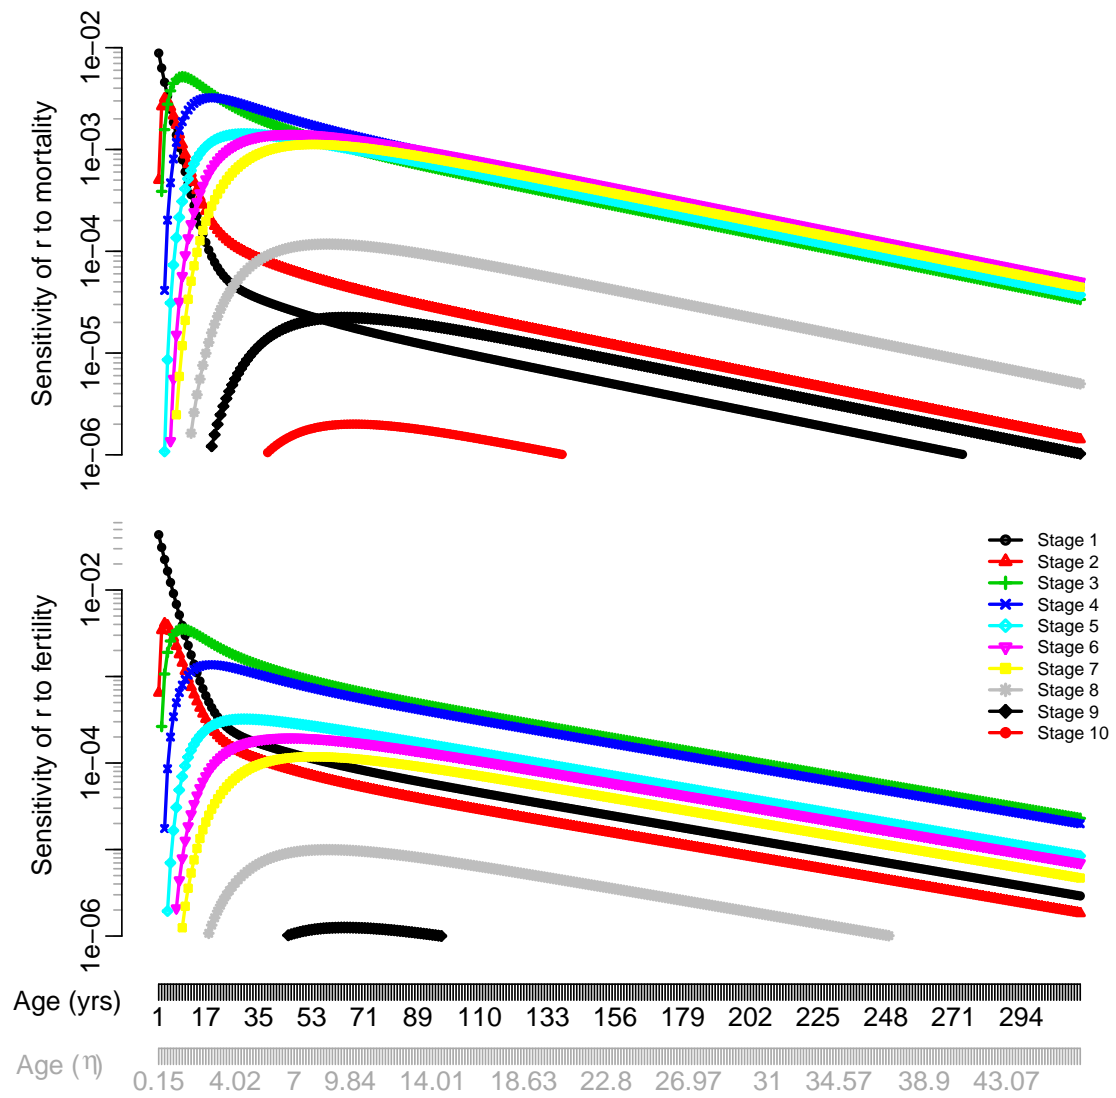

**Figure 39:** Selection gradients on age×stage-specific mortality and fertility. Top  $x$  axis represents age in years, whereas the bottom  $x$  axis represents time-scale normalized by the life expectancy ( $\eta$ ) of the first non-seedbank stage (FNSS) of the species.

S1.14 *Hylocomium splendens*

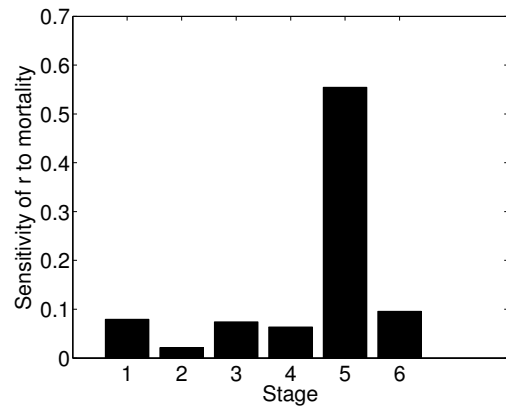

(a) Stage-specific mortality

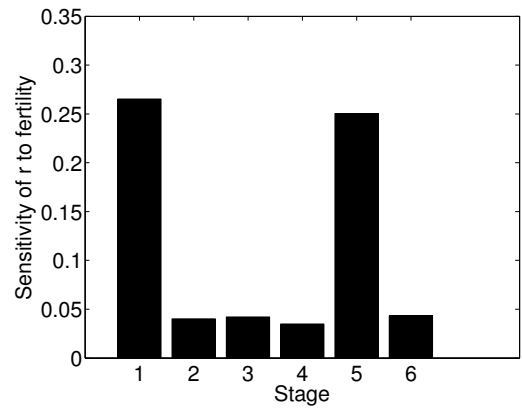

(b) Stage-specific fertility

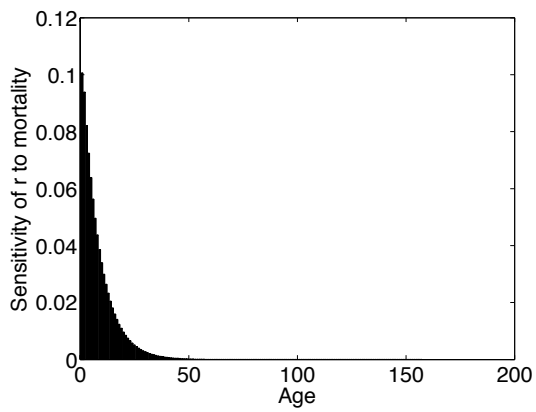

(c) Age-specific mortality

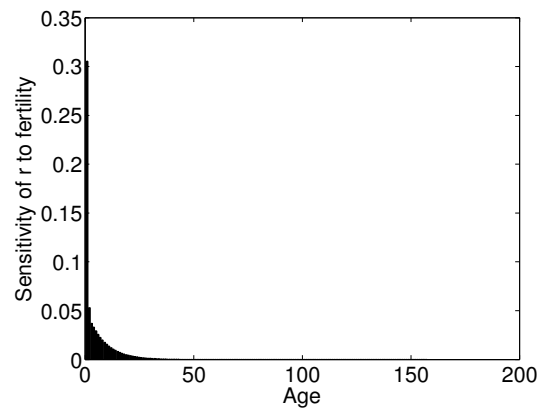

(d) Age-specific fertility

**Figure 40:** Selection gradients on age-specific and stage-specific mortality and fertility.

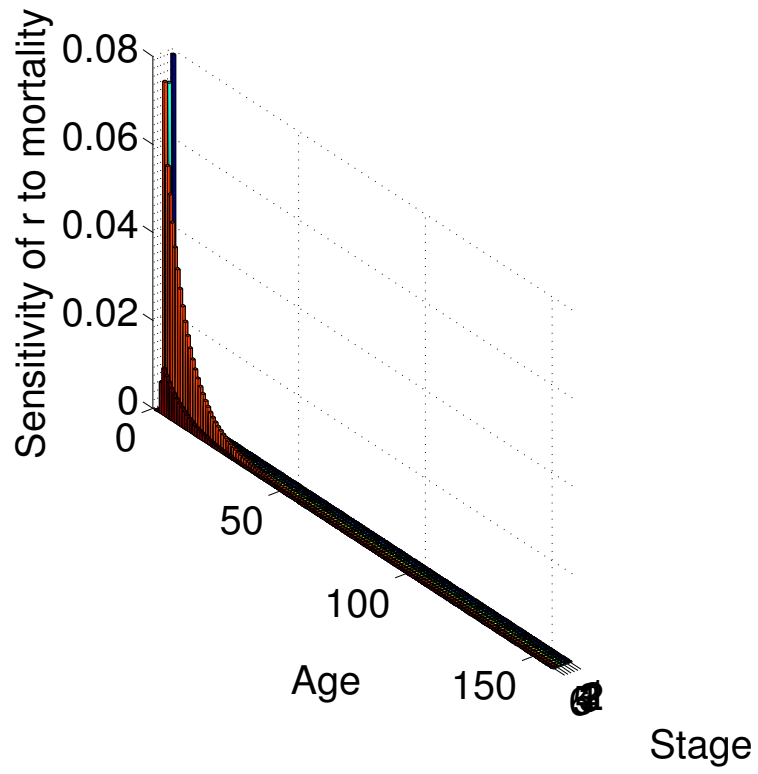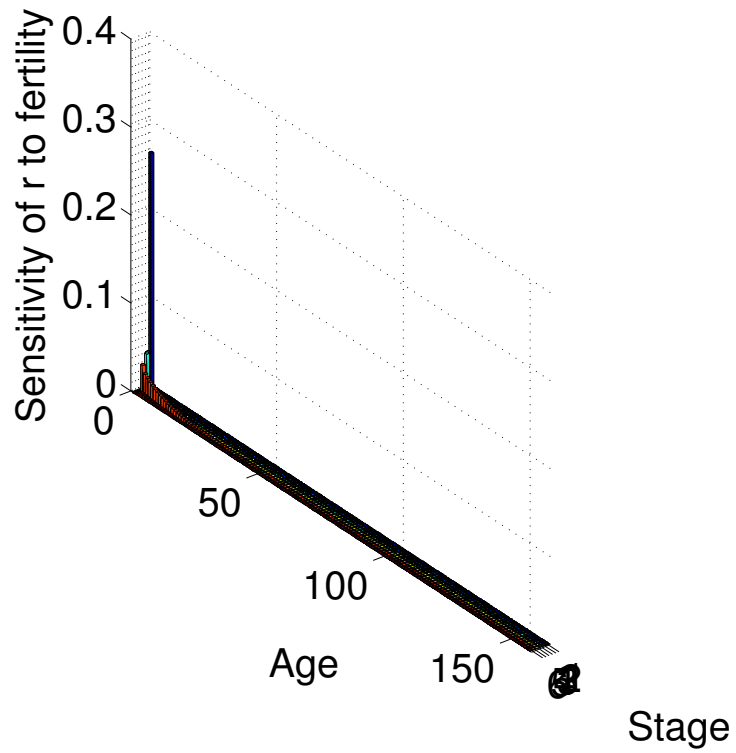

**Figure 41:** Selection gradients on age $\times$ stage-specific mortality and fertility.

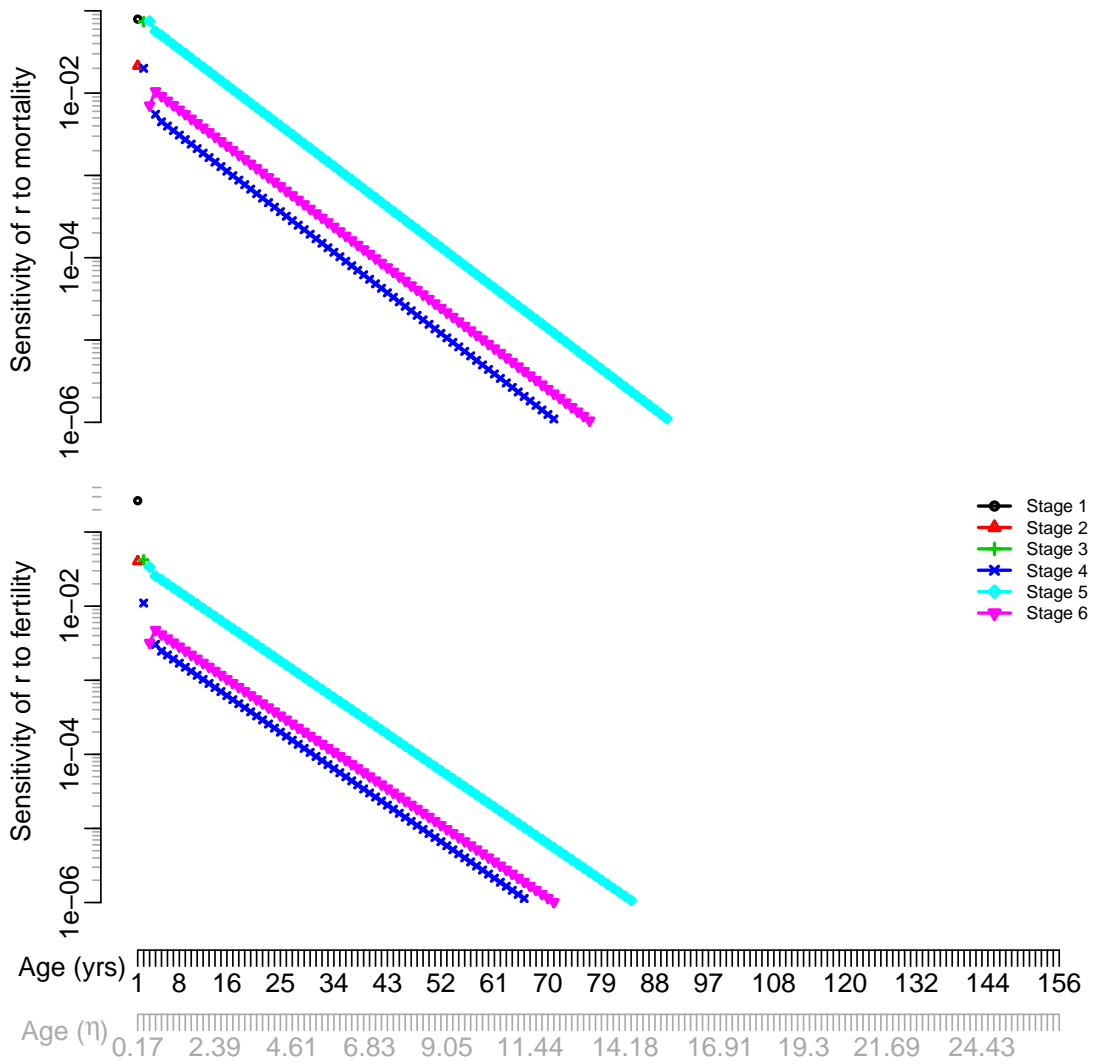

**Figure 42:** Selection gradients on age×stage-specific mortality and fertility. Top  $x$  axis represents age in years, whereas the bottom  $x$  axis represents time-scale normalized by the life expectancy ( $\eta$ ) of the first non-seedbank stage (FNSS) of the species.



S1.15 *Hypericum cumulicola*

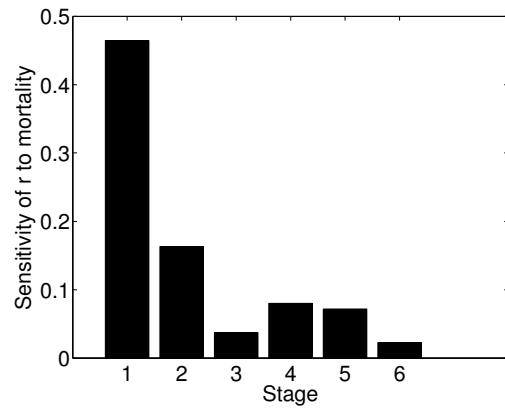

(a) Stage-specific mortality

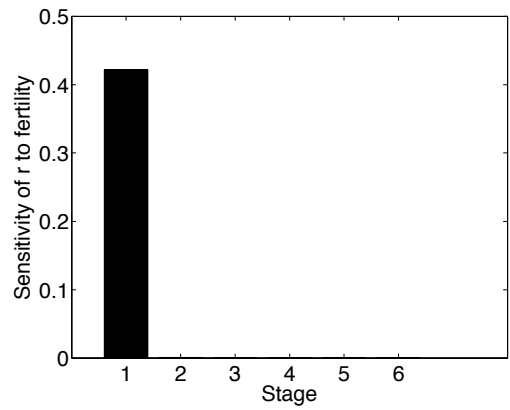

(b) Stage-specific fertility

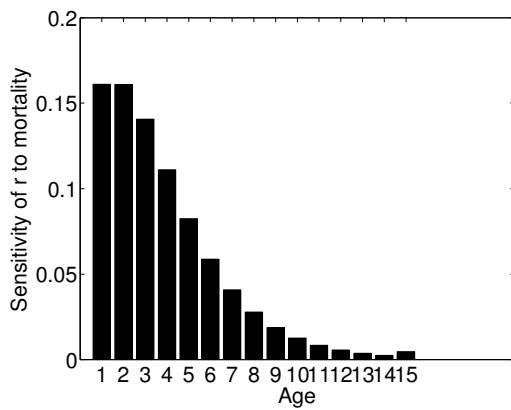

(c) Age-specific mortality

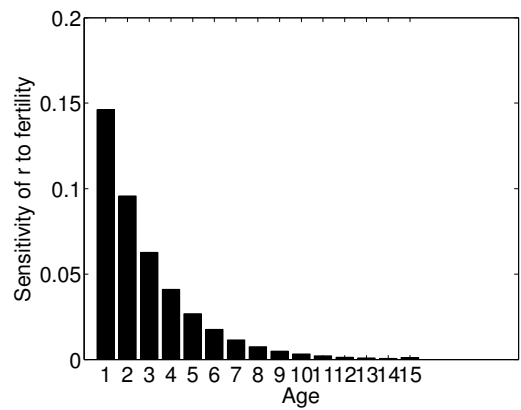

(d) Age-specific fertility

**Figure 43:** Selection gradients on age-specific and stage-specific mortality and fertility.

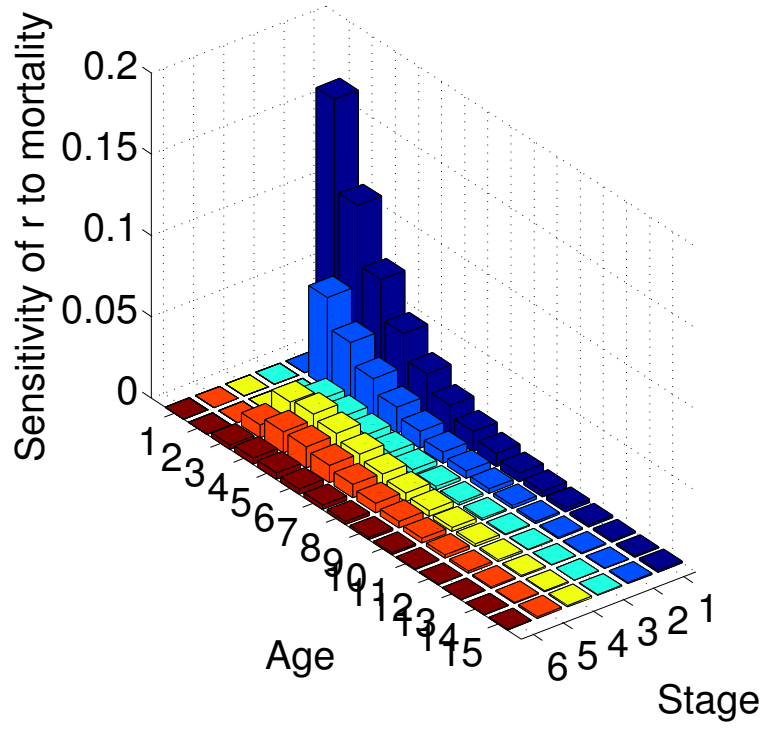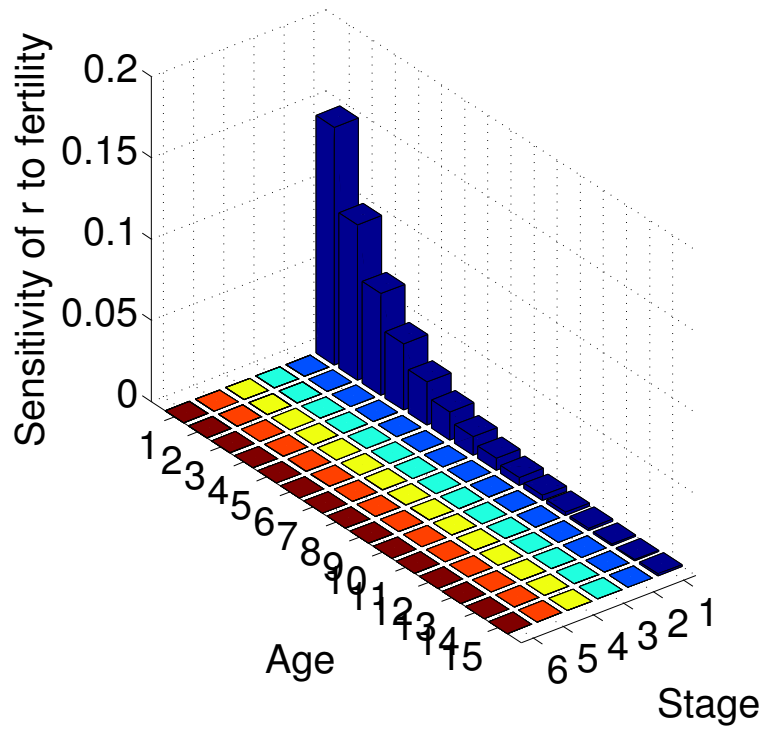

**Figure 44:** Selection gradients on age×stage-specific mortality and fertility.

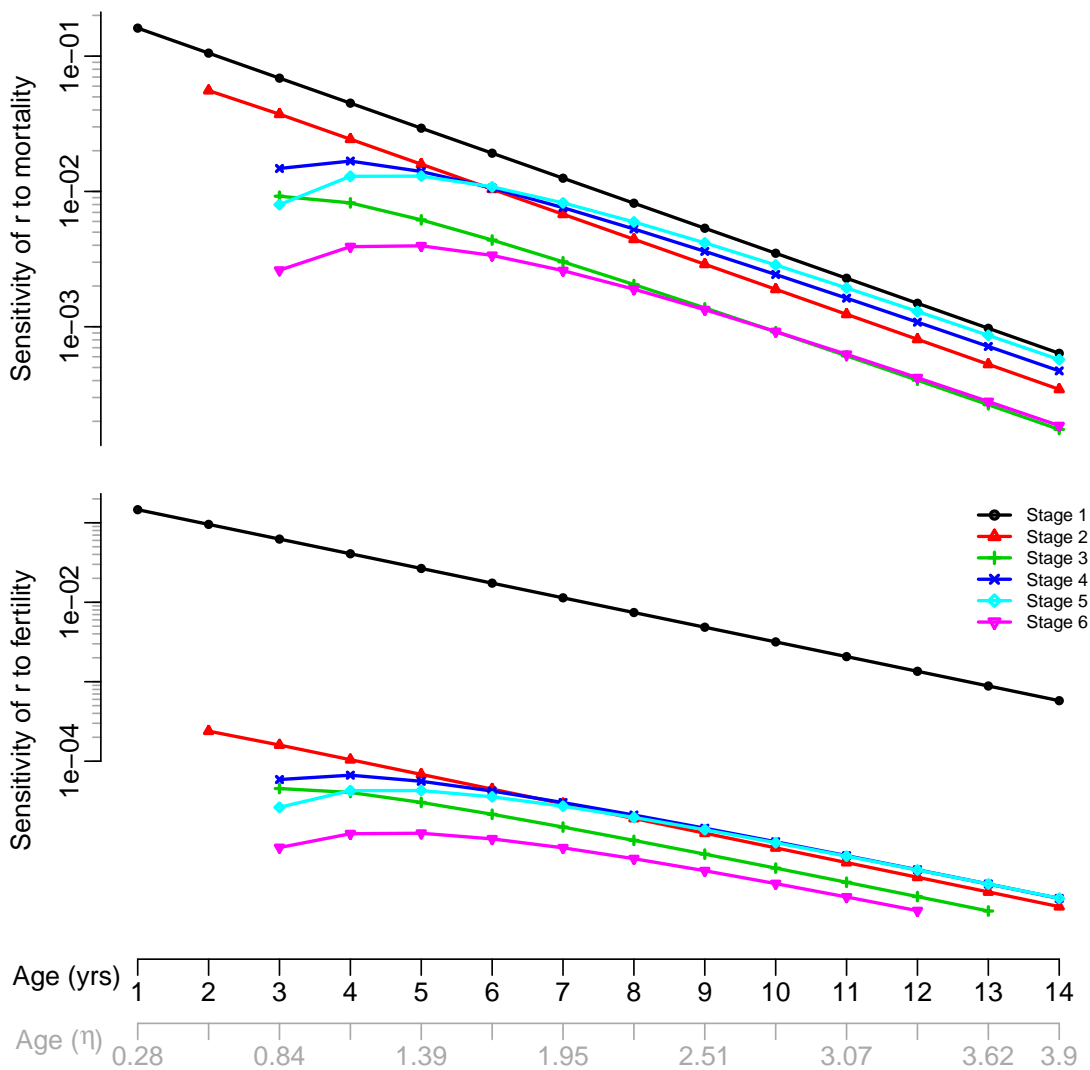

**Figure 45:** Selection gradients on age×stage-specific mortality and fertility. Top  $x$  axis represents age in years, whereas the bottom  $x$  axis represents time-scale normalized by the life expectancy ( $\eta$ ) of the first non-seedbank stage (FNSS) of the species.

S1.16 *Iridaea splendens*

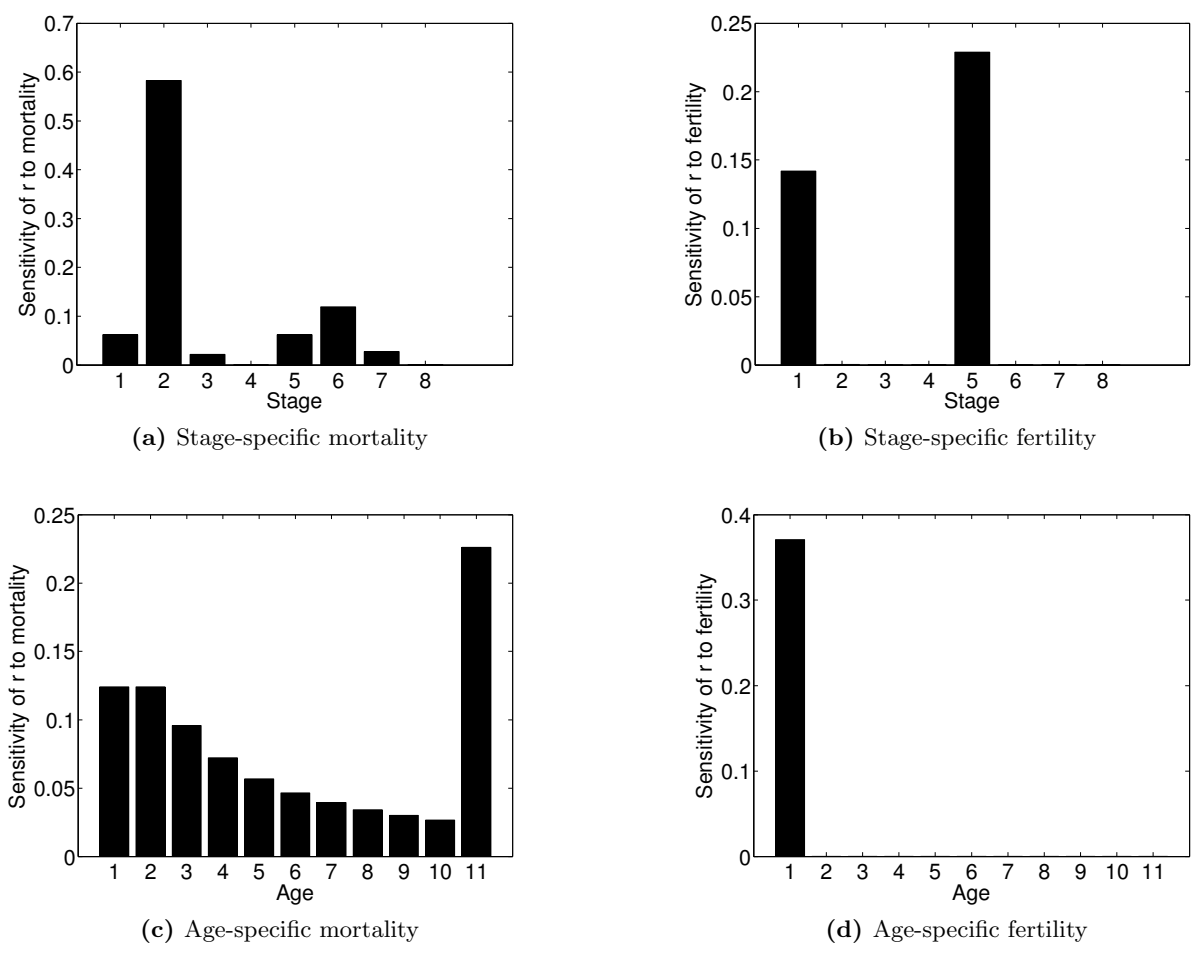

Figure 46: Selection gradients on age-specific and stage-specific mortality and fertility.

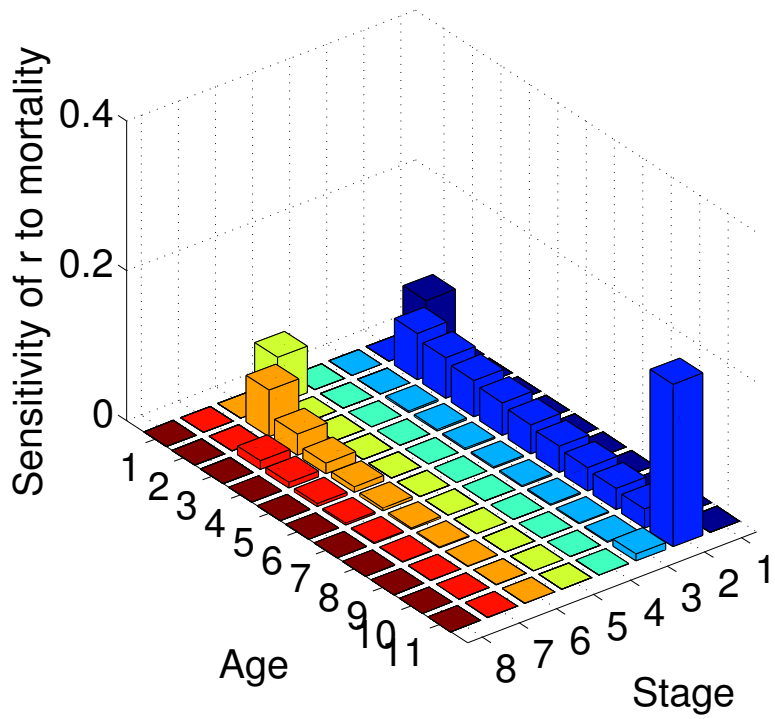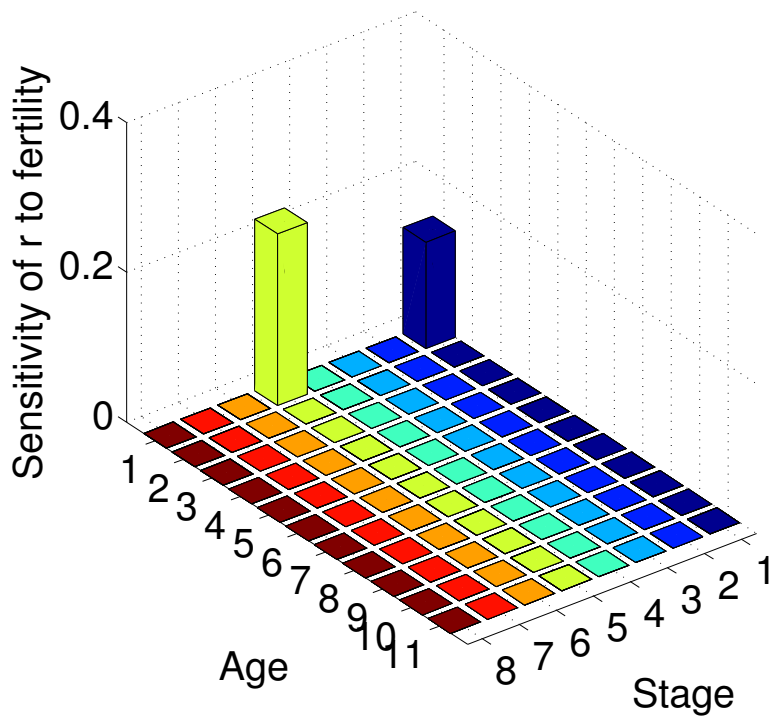

Figure 47: Selection gradients on age×stage-specific mortality and fertility.

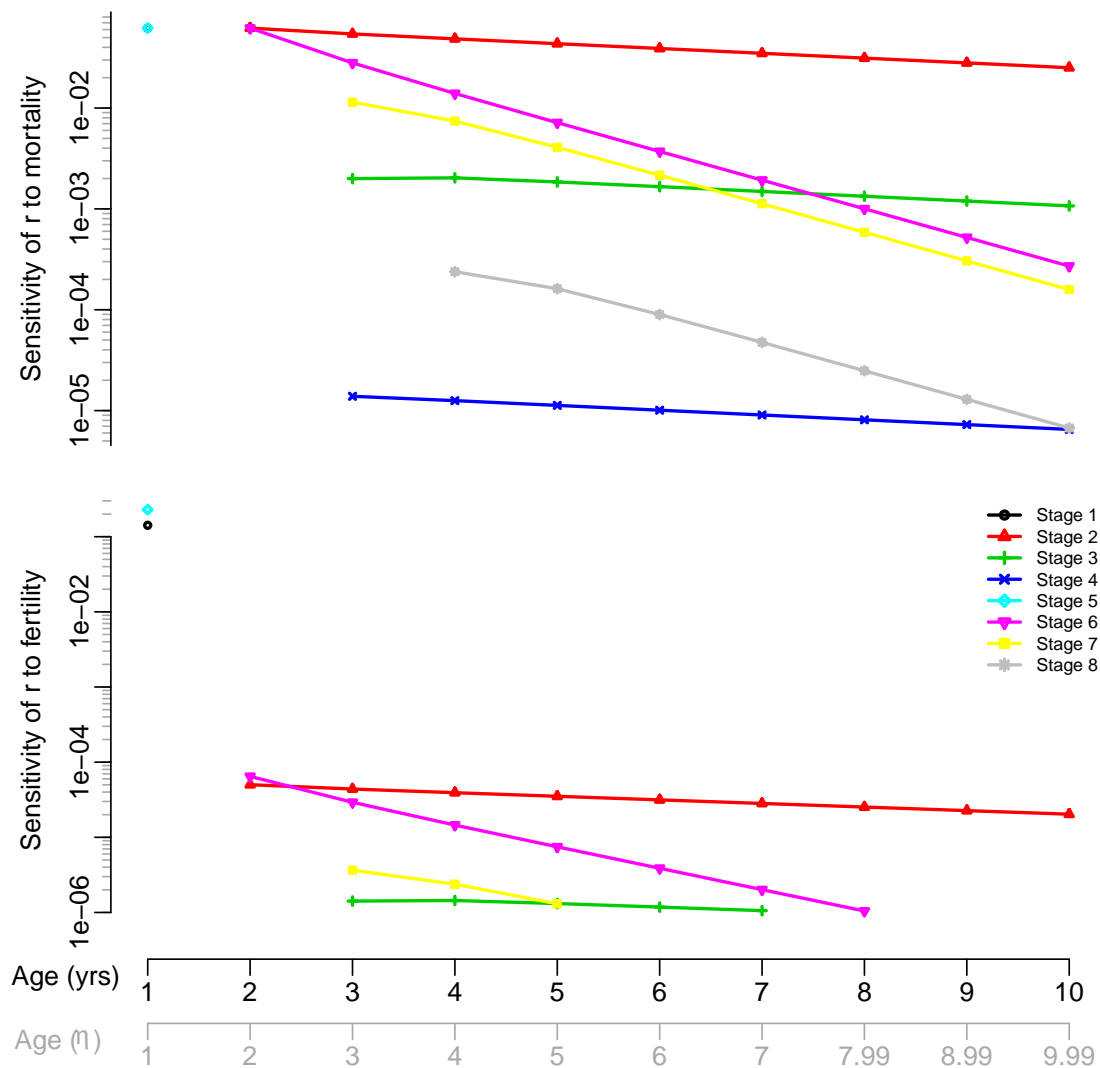

**Figure 48:** Selection gradients on age $\times$ stage-specific mortality and fertility. Top  $x$  axis represents age in years, whereas the bottom  $x$  axis represents time-scale normalized by the life expectancy ( $\eta$ ) of the first non-seedbank stage (FNSS) of the species.

S1.17 *Laminaria digitata*

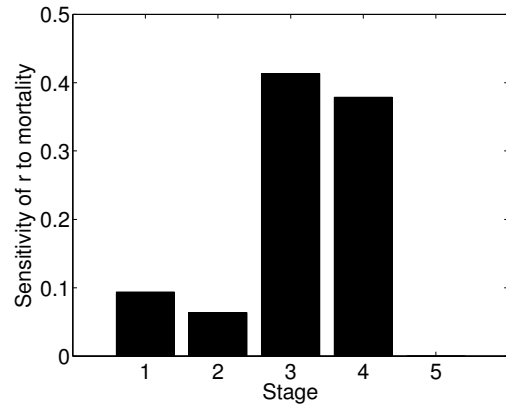

(a) Stage-specific mortality

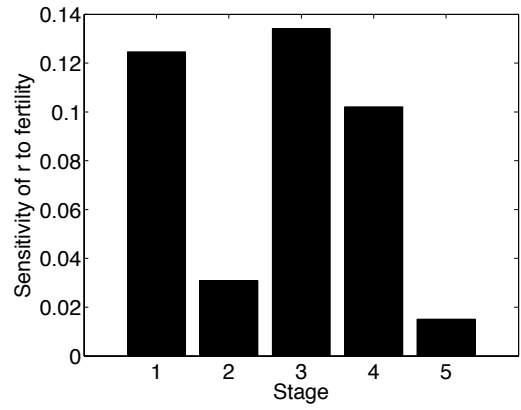

(b) Stage-specific fertility

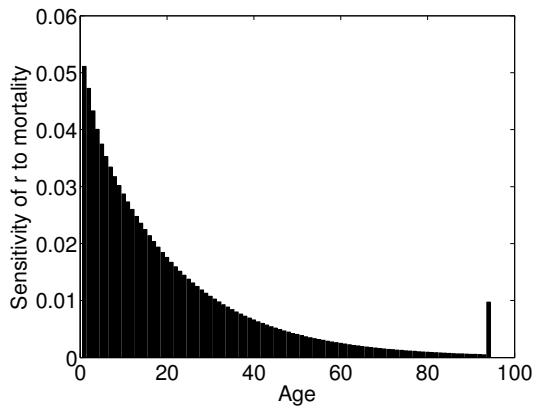

(c) Age-specific mortality

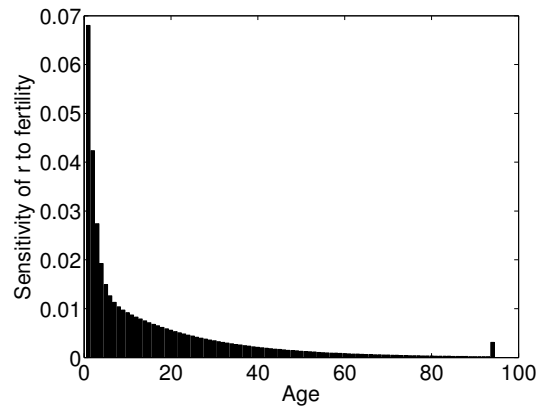

(d) Age-specific fertility

**Figure 49:** Selection gradients on age-specific and stage-specific mortality and fertility.

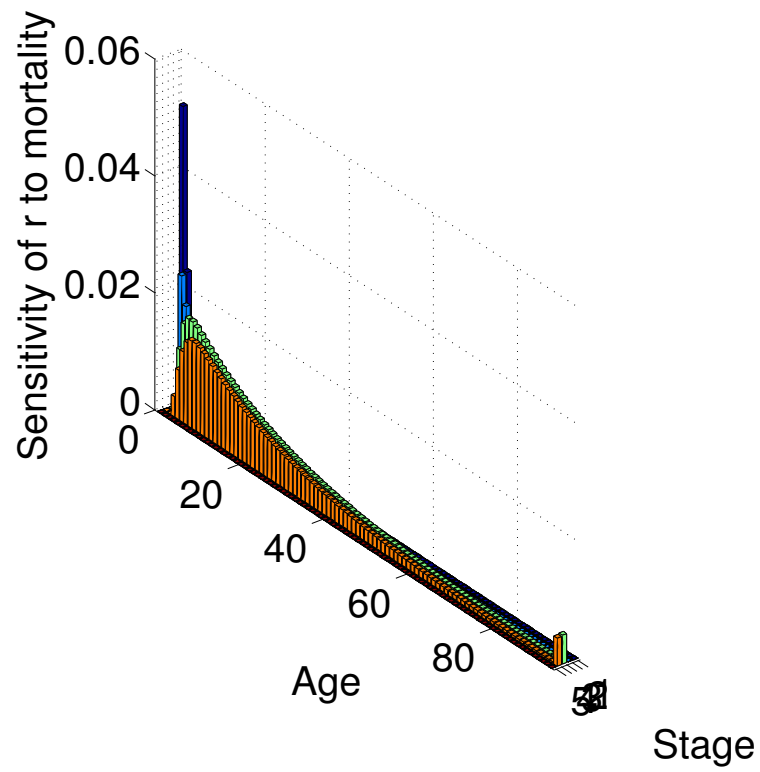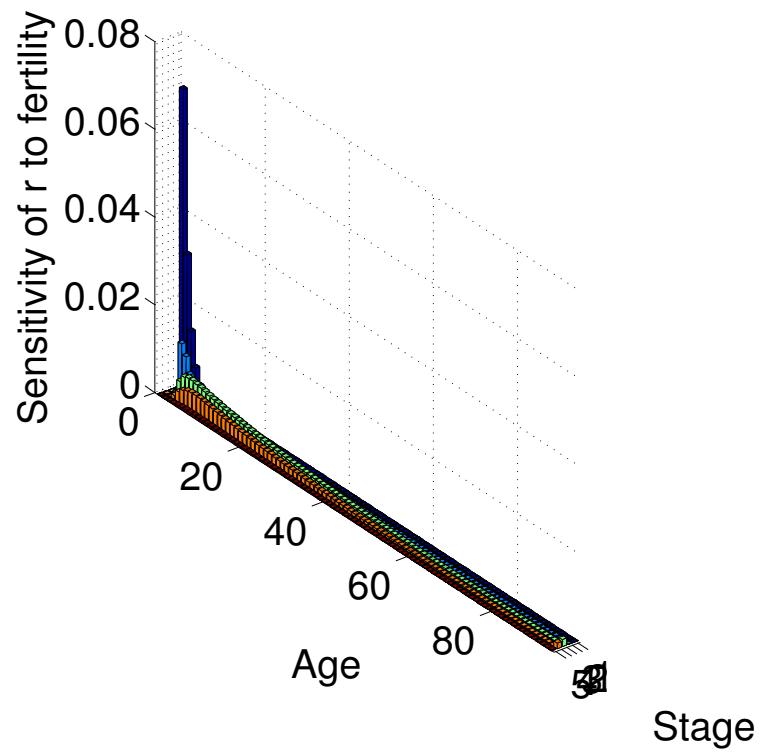

**Figure 50:** Selection gradients on age×stage-specific mortality and fertility.



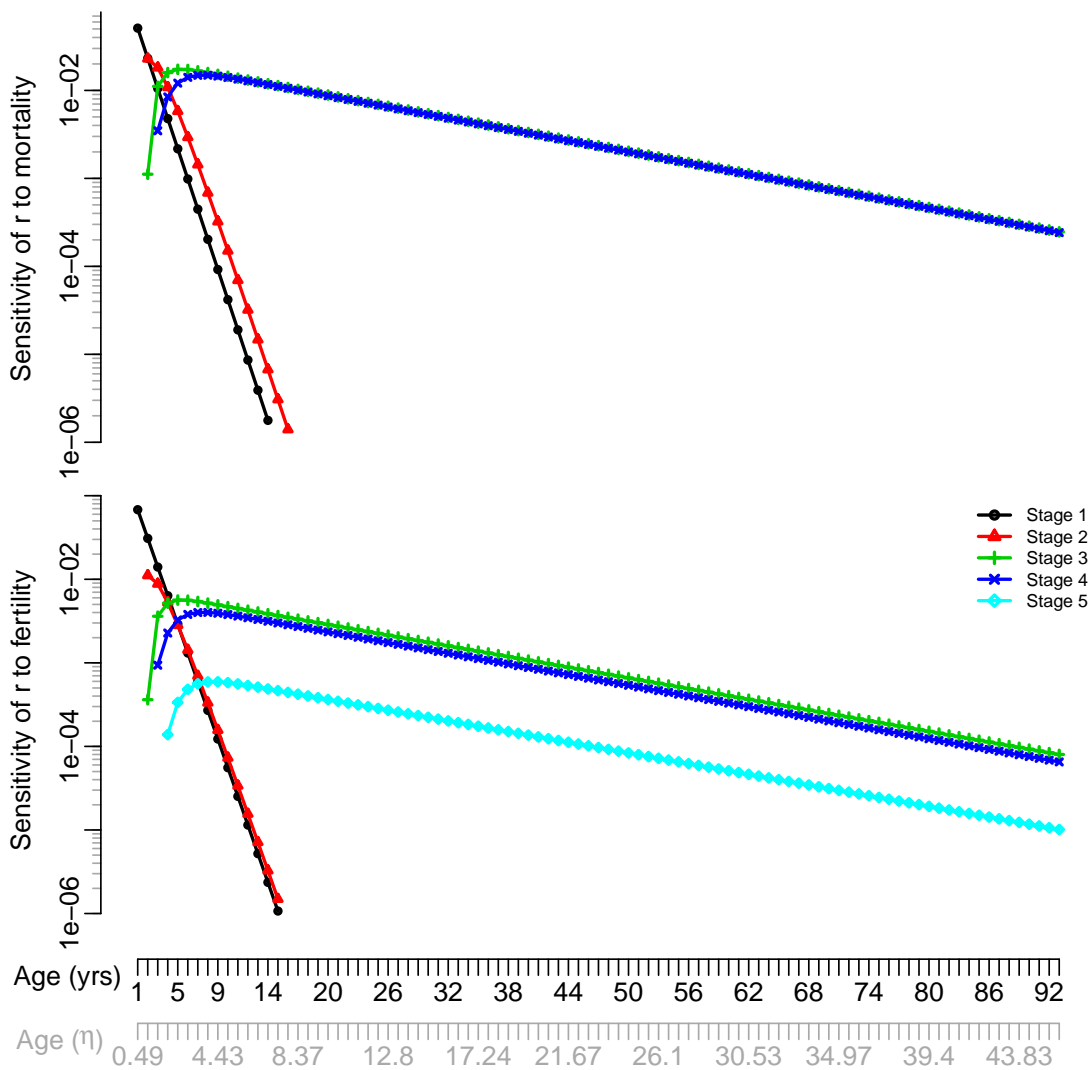

**Figure 51:** Selection gradients on age×stage-specific mortality and fertility. Top  $x$  axis represents age in years, whereas the bottom  $x$  axis represents time-scale normalized by the life expectancy ( $\eta$ ) of the first non-seedbank stage (FNSS) of the species.

S1.18 *Lupinus arboreus*

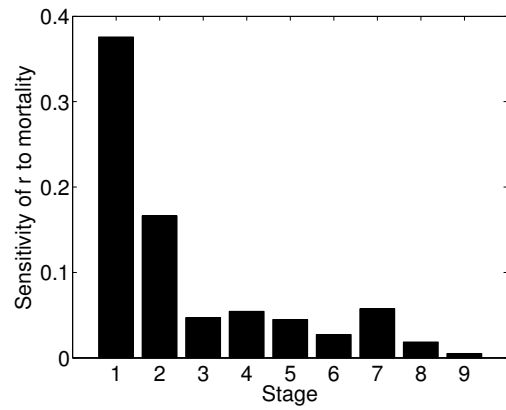

(a) Stage-specific mortality

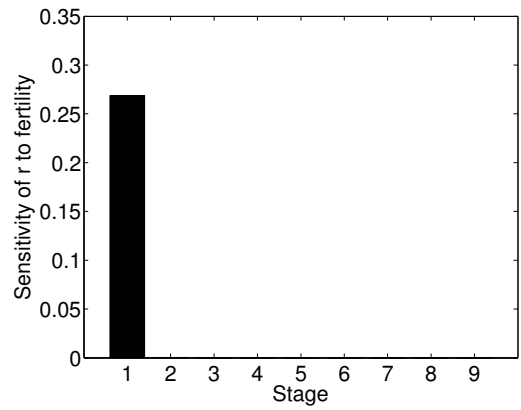

(b) Stage-specific fertility

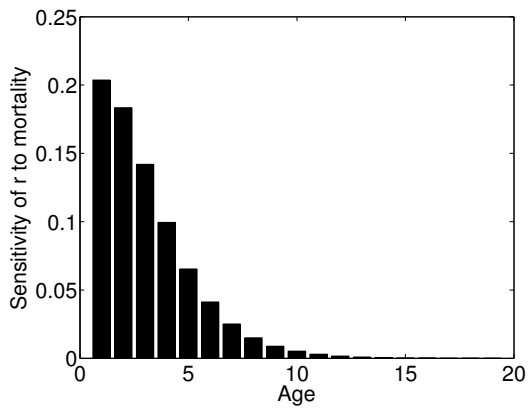

(c) Age-specific mortality

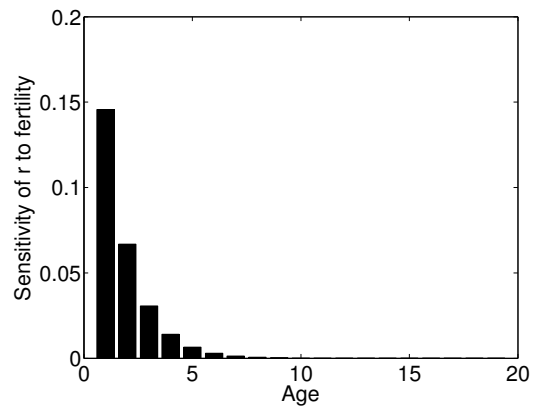

(d) Age-specific fertility

**Figure 52:** Selection gradients on age-specific and stage-specific mortality and fertility.

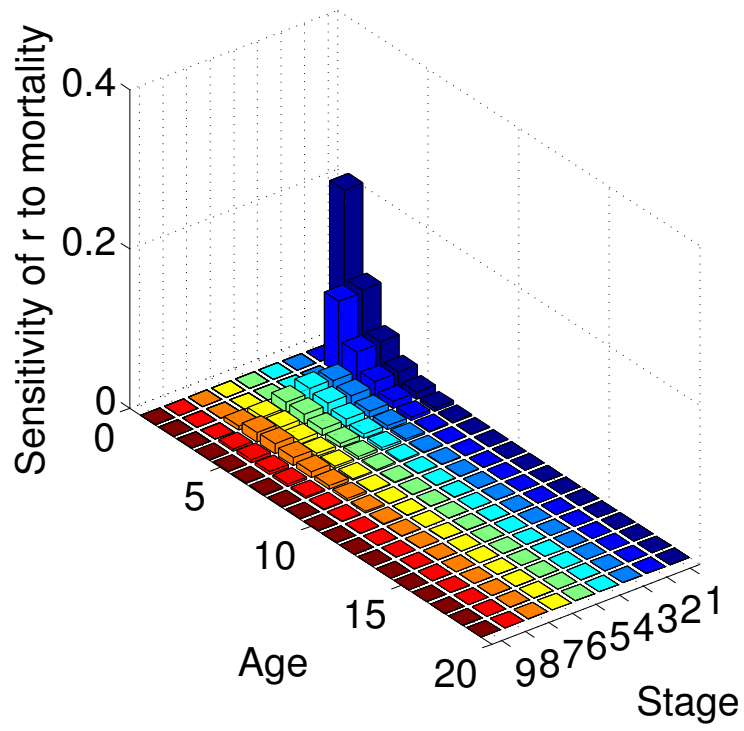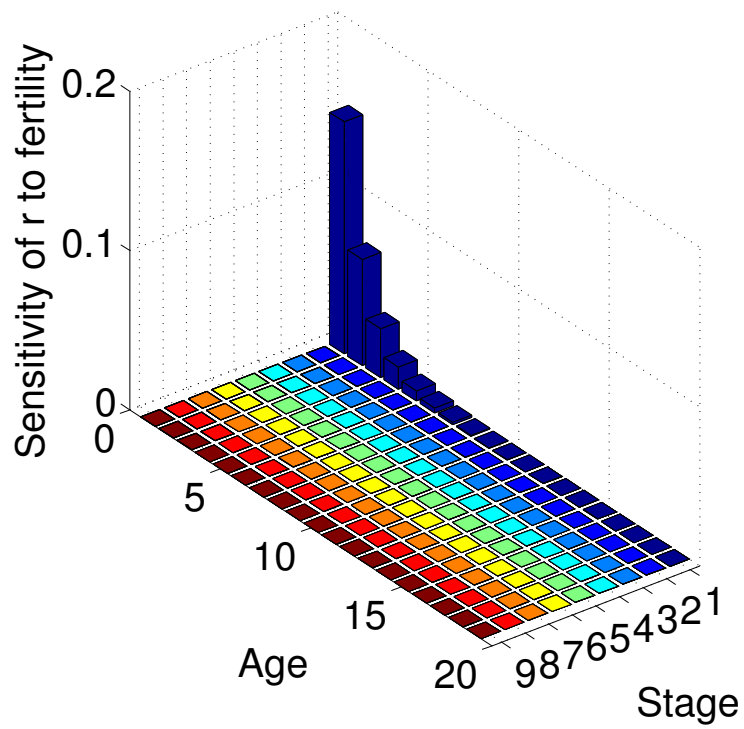

**Figure 53:** Selection gradients on age $\times$ stage-specific mortality and fertility.

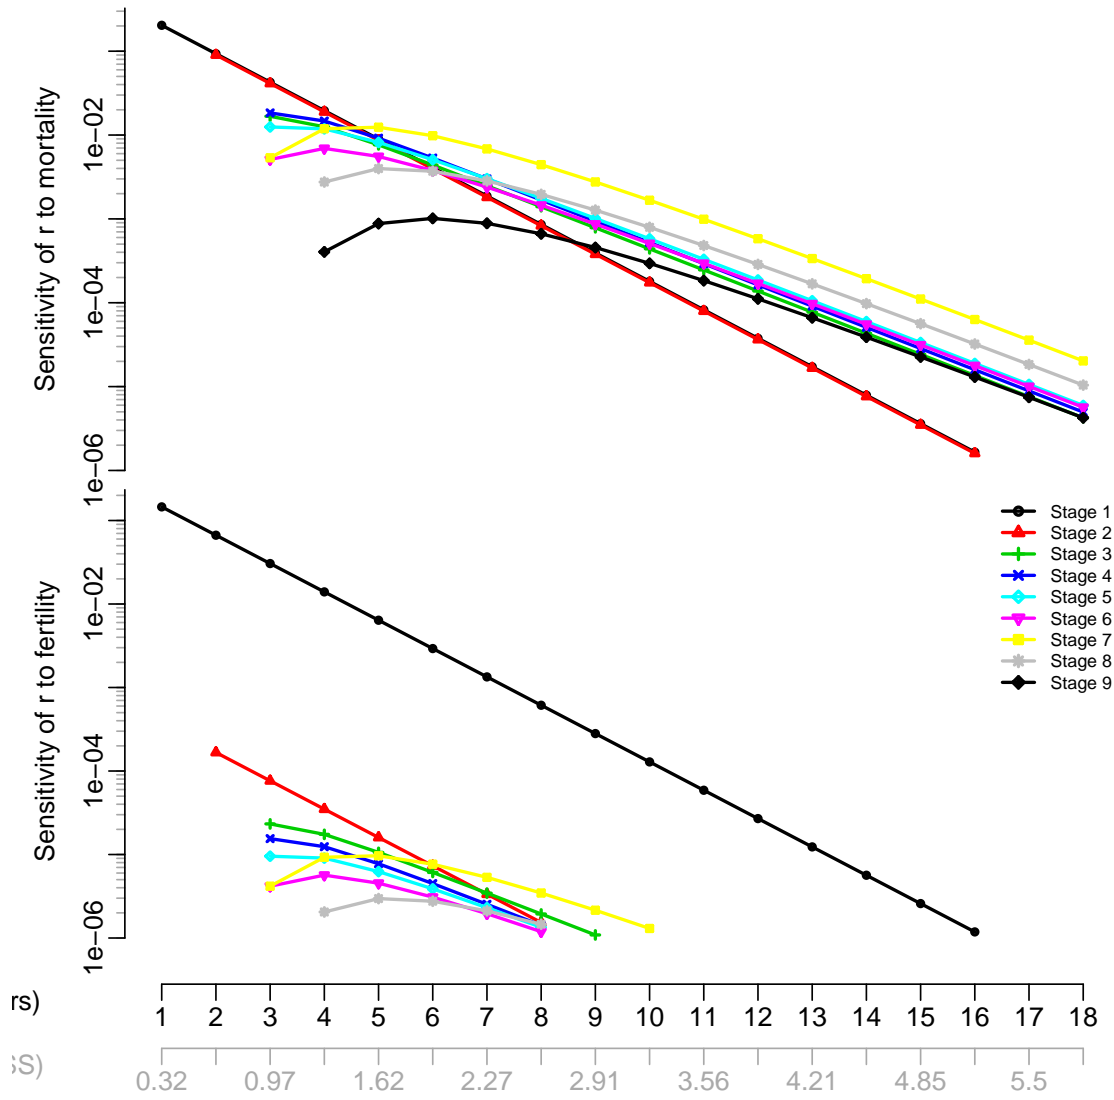

**Figure 54:** Selection gradients on age×stage-specific mortality and fertility. Top  $x$  axis represents age in years, whereas the bottom  $x$  axis represents time-scale normalized by the life expectancy ( $\eta$ ) of the first non-seedbank stage (FNSS) of the species.

S1.19 *Machaerium cuspidatum*

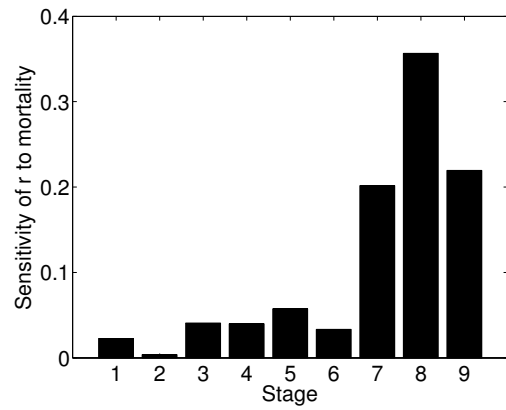

(a) Stage-specific mortality

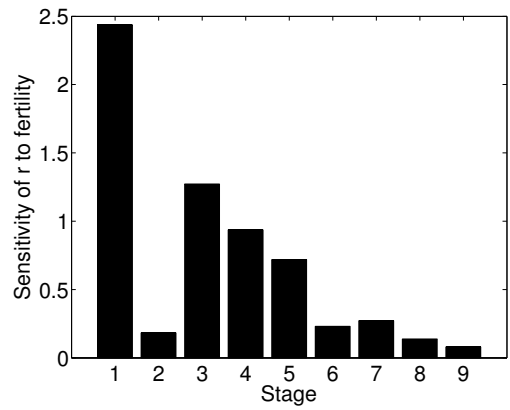

(b) Stage-specific fertility

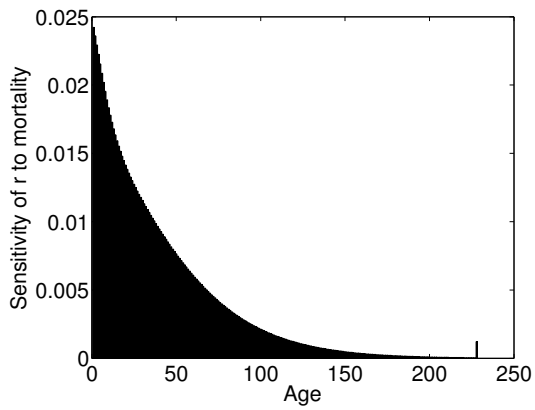

(c) Age-specific mortality

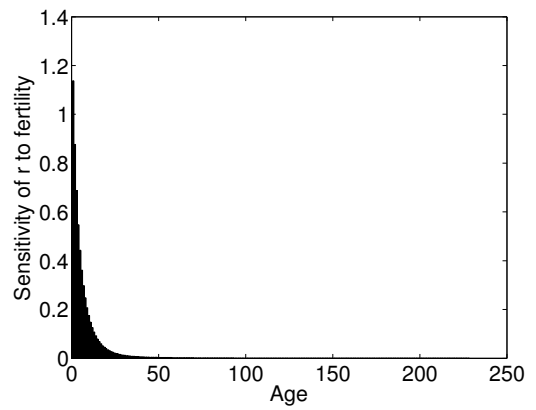

(d) Age-specific fertility

**Figure 55:** Selection gradients on age-specific and stage-specific mortality and fertility.

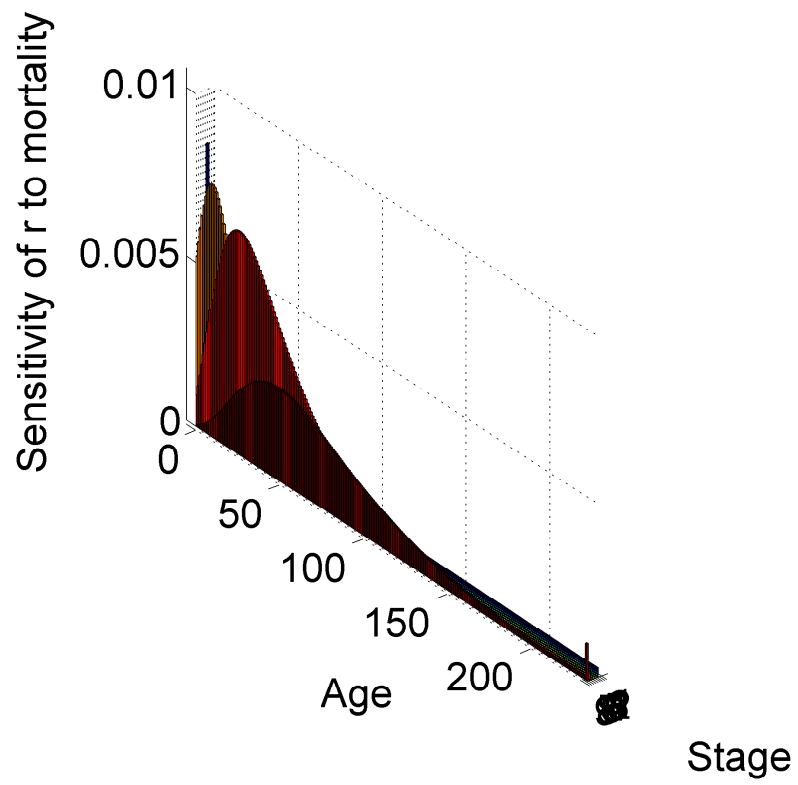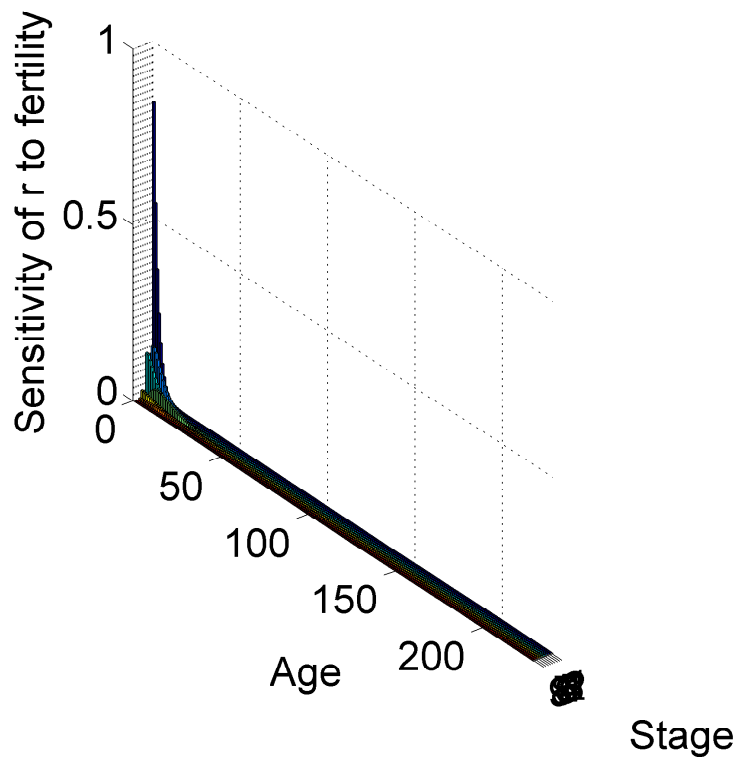

**Figure 56:** Selection gradients on age×stage-specific mortality and fertility.

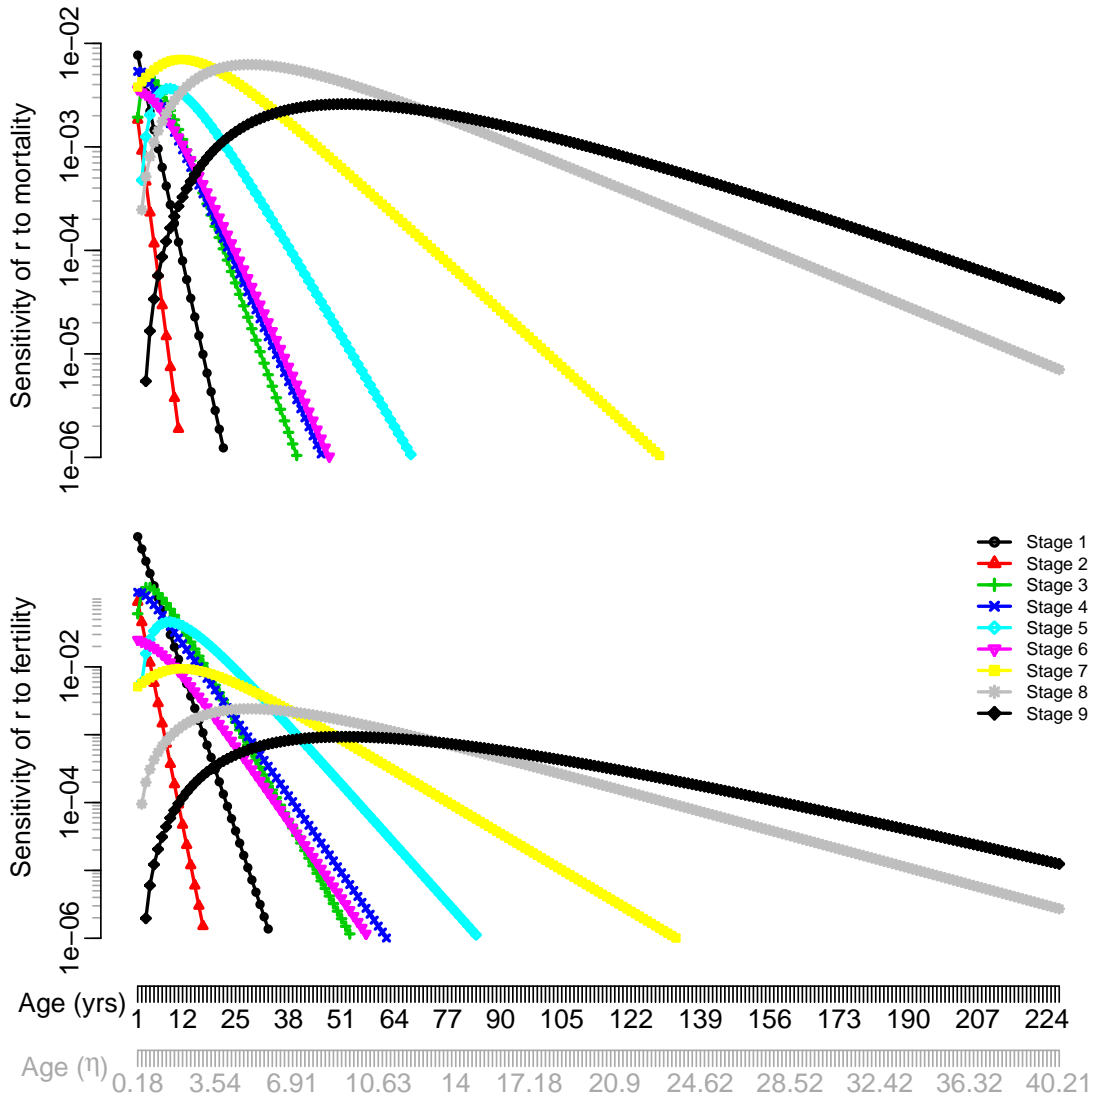

**Figure 57:** Selection gradients on age×stage-specific mortality and fertility. Top  $x$  axis represents age in years, whereas the bottom  $x$  axis represents time-scale normalized by the life expectancy ( $\eta$ ) of the first non-seedbank stage (FNSS) of the species.

S1.20 *Opuntia rastrera*

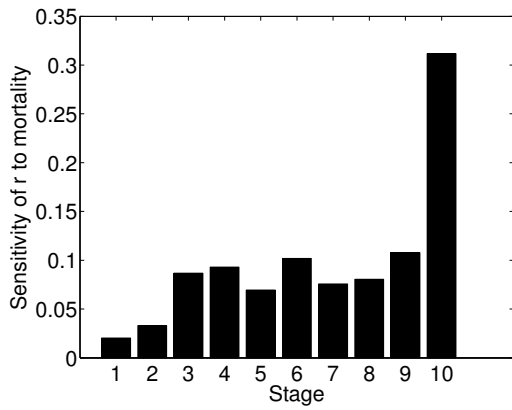

(a) Stage-specific mortality

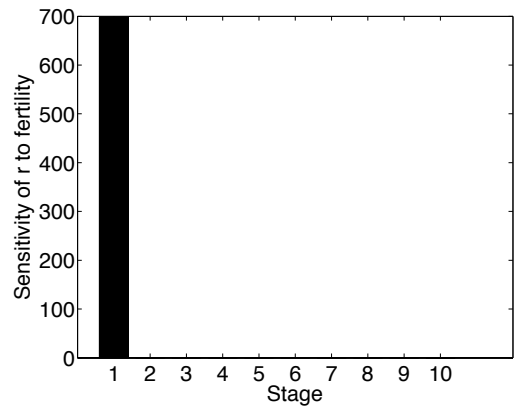

(b) Stage-specific fertility

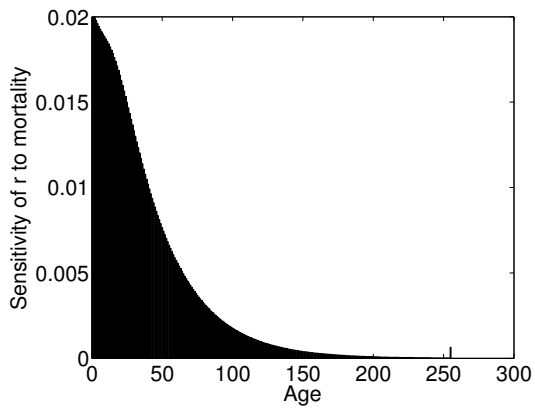

(c) Age-specific mortality

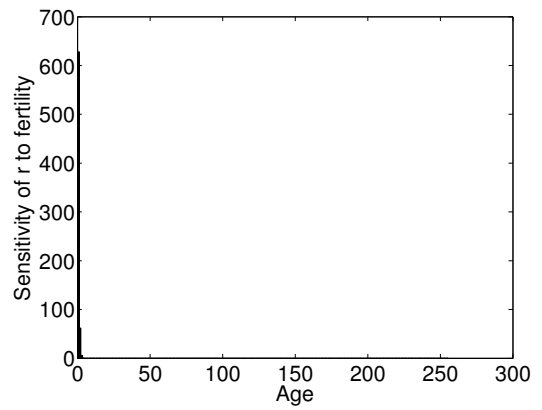

(d) Age-specific fertility

**Figure 58:** Selection gradients on age-specific and stage-specific mortality and fertility.



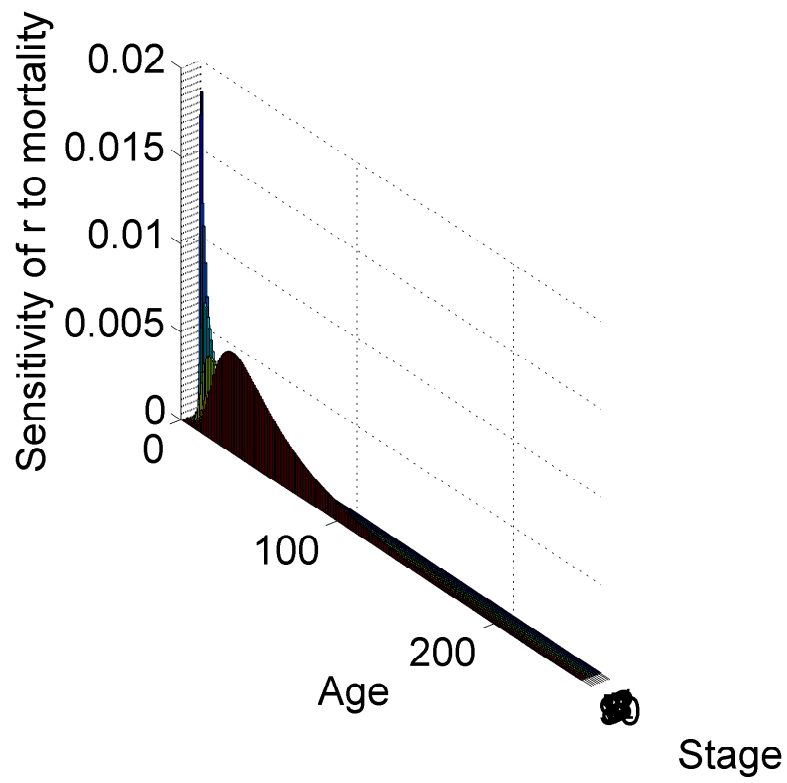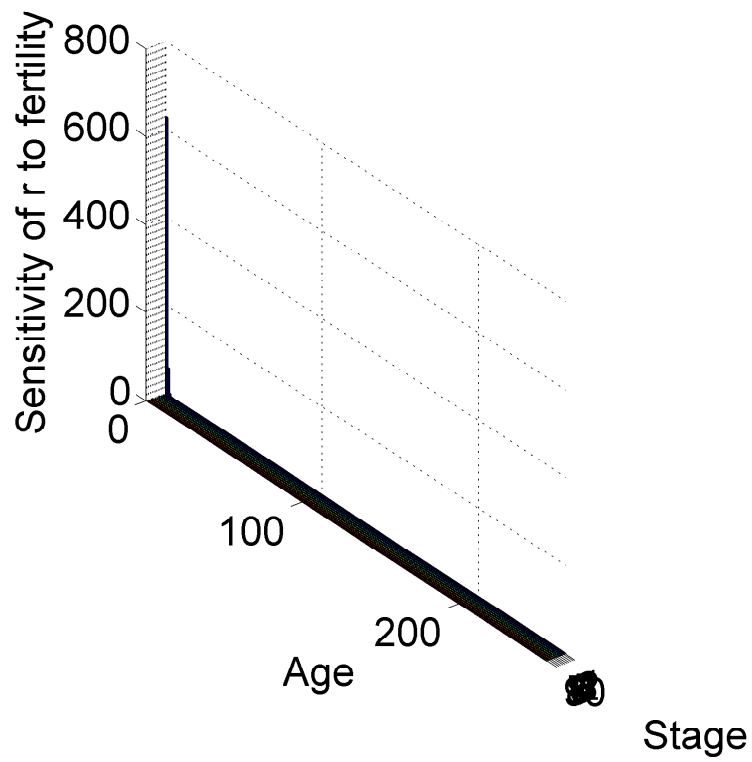

**Figure 59:** Selection gradients on age $\times$ stage-specific mortality and fertility.

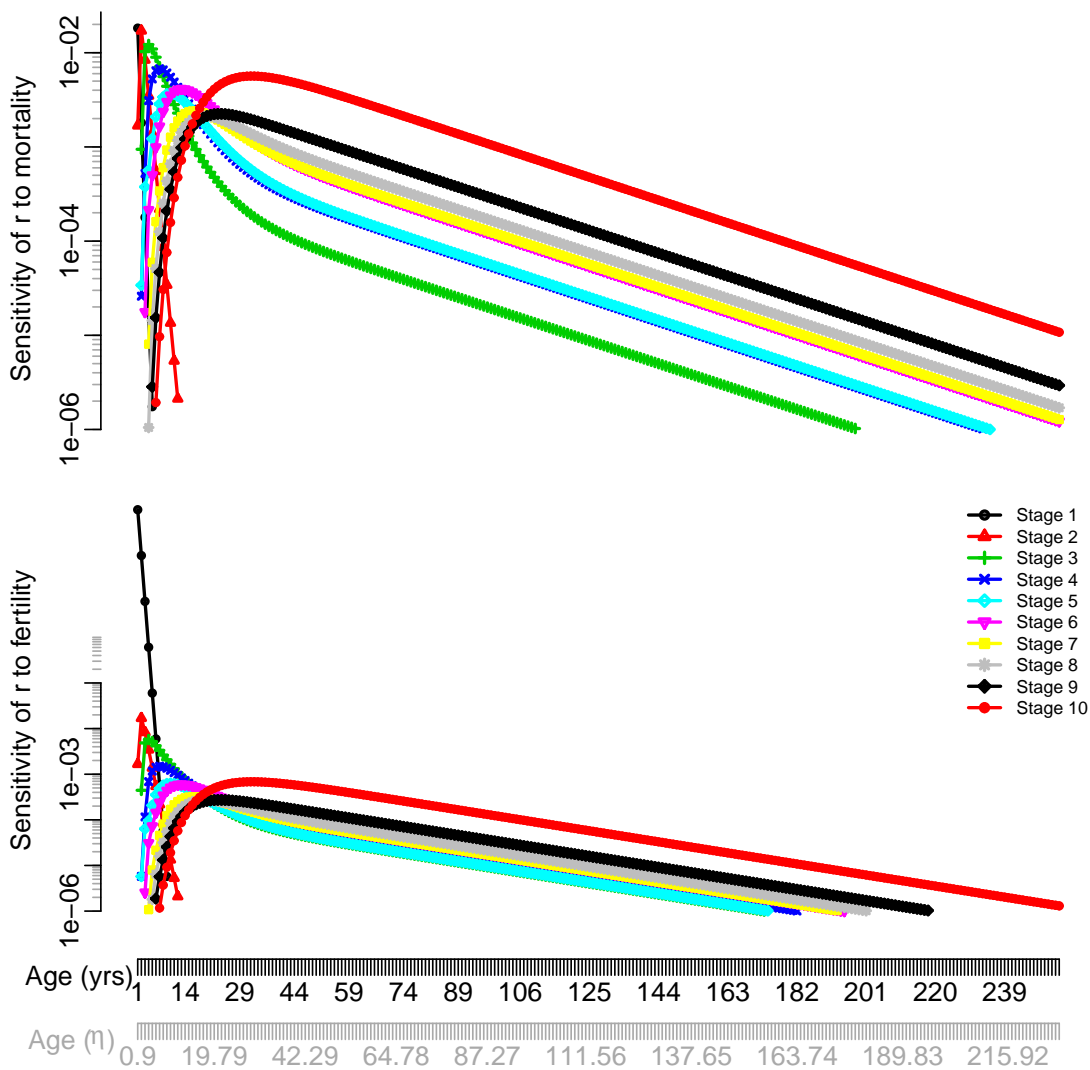

**Figure 60:** Selection gradients on age×stage-specific mortality and fertility. Top  $x$  axis represents age in years, whereas the bottom  $x$  axis represents time-scale normalized by the life expectancy ( $\eta$ ) of the first non-seedbank stage (FNSS) of the species.

S1.21 *Panax quinquefolium*

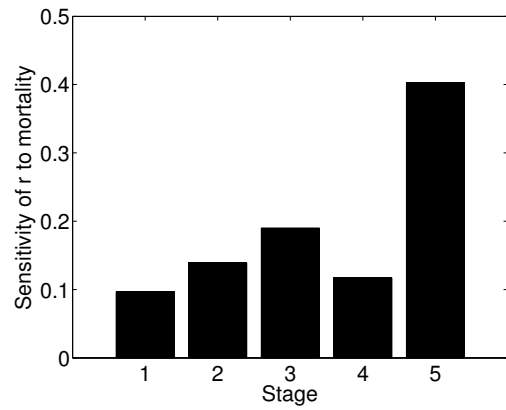

(a) Stage-specific mortality

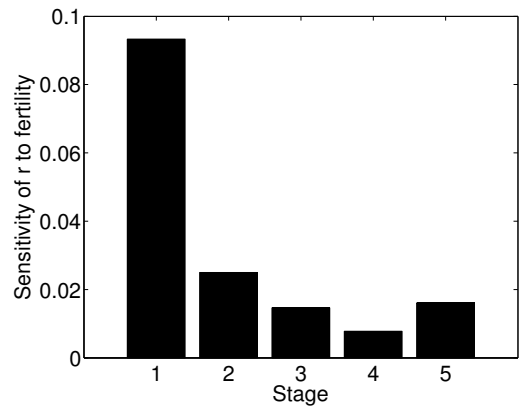

(b) Stage-specific fertility

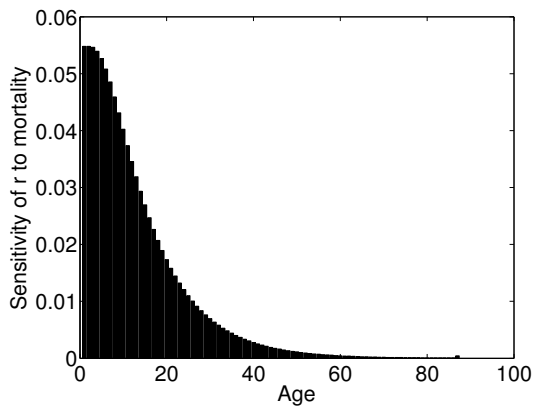

(c) Age-specific mortality

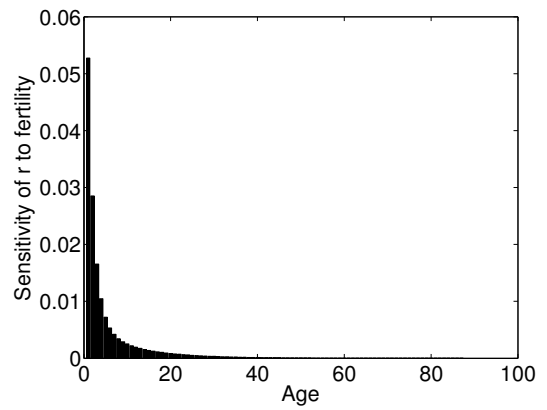

(d) Age-specific fertility

**Figure 61:** Selection gradients on age-specific and stage-specific mortality and fertility.

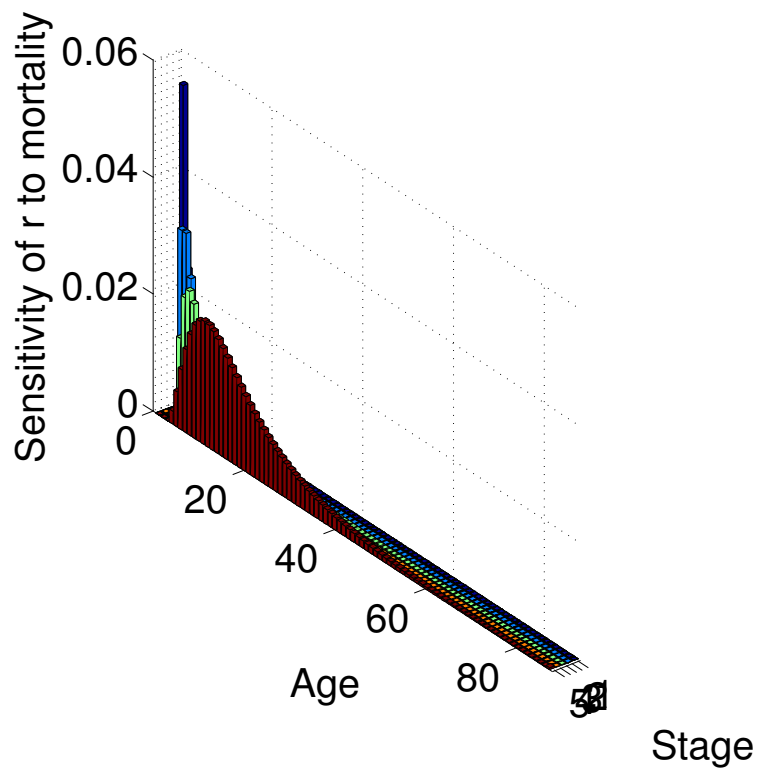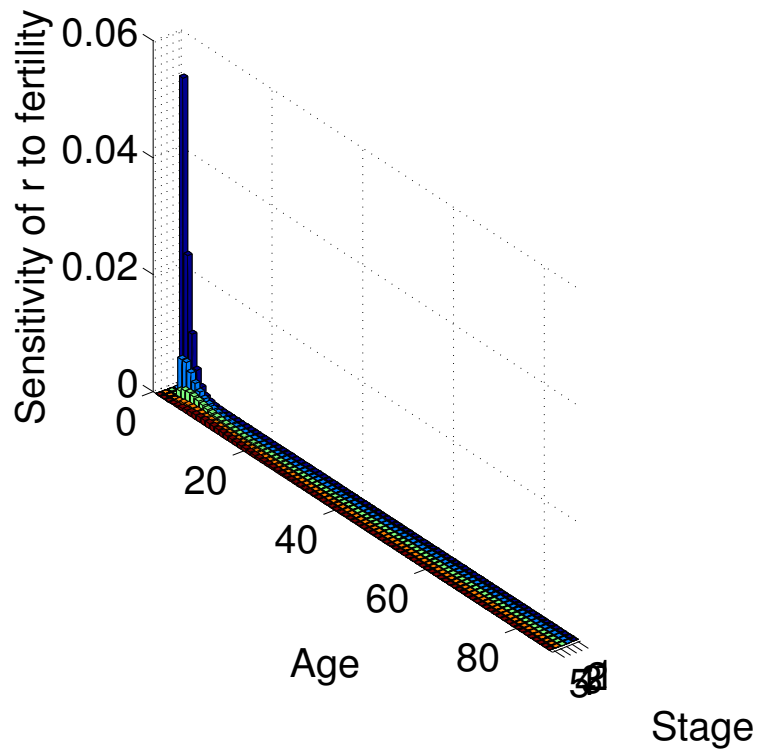

**Figure 62:** Selection gradients on age×stage-specific mortality and fertility.

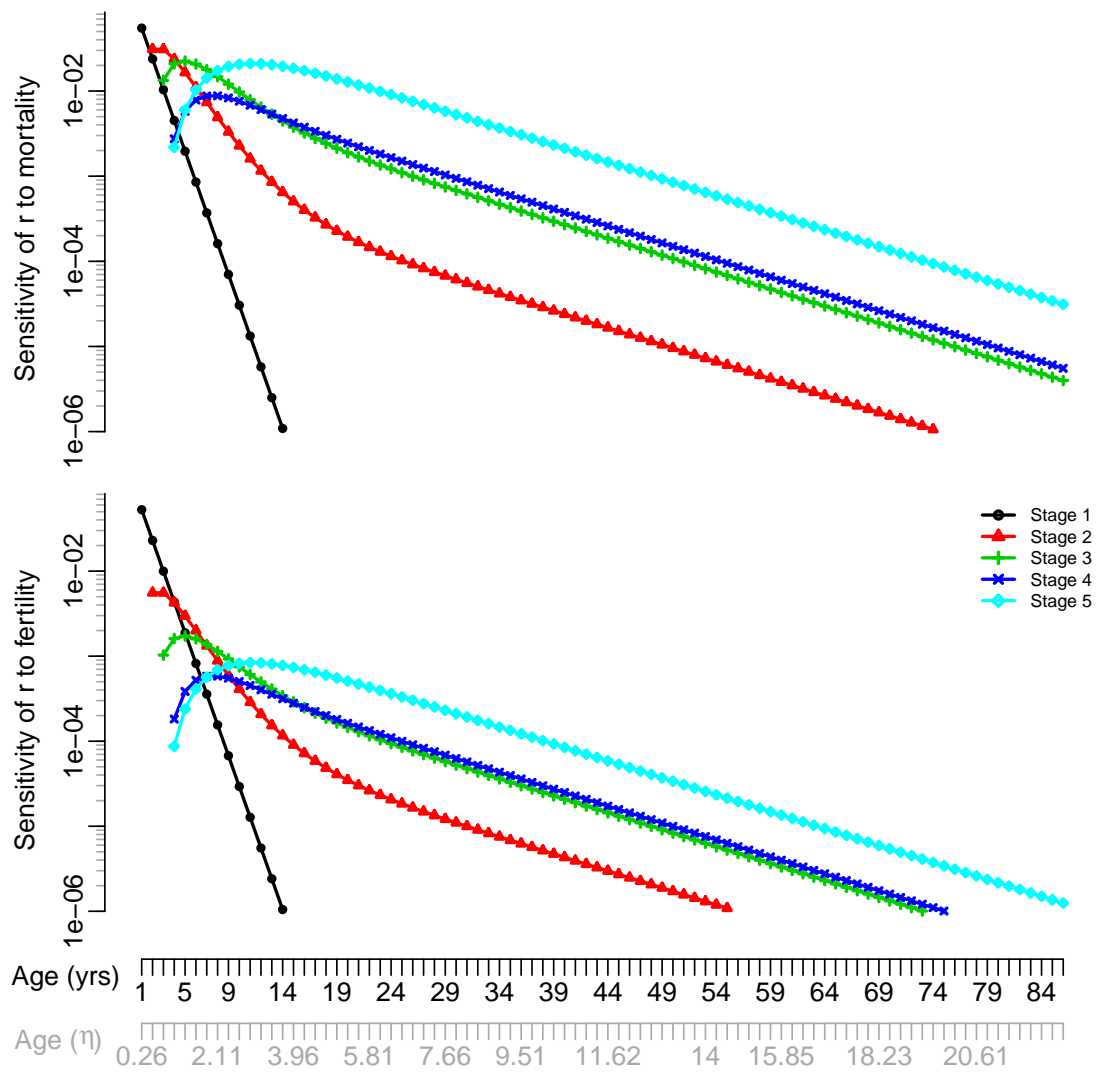

**Figure 63:** Selection gradients on age×stage-specific mortality and fertility. Top  $x$  axis represents age in years, whereas the bottom  $x$  axis represents time-scale normalized by the life expectancy ( $\eta$ ) of the first non-seedbank stage (FNSS) of the species.

S1.22 *Parashorea chinensis*

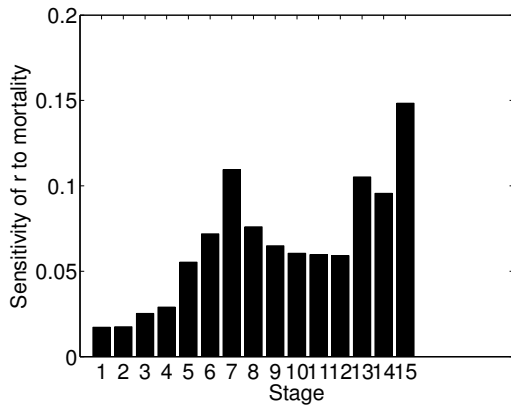

(a) Stage-specific mortality

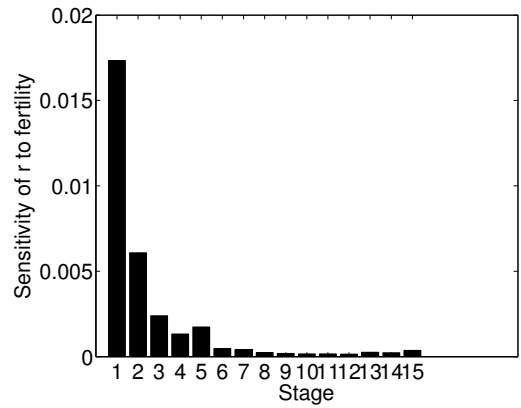

(b) Stage-specific fertility

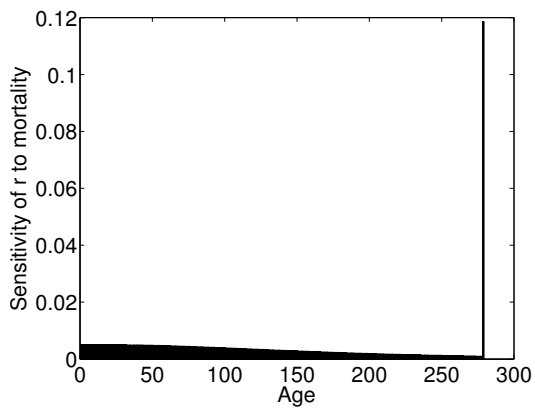

(c) Age-specific mortality

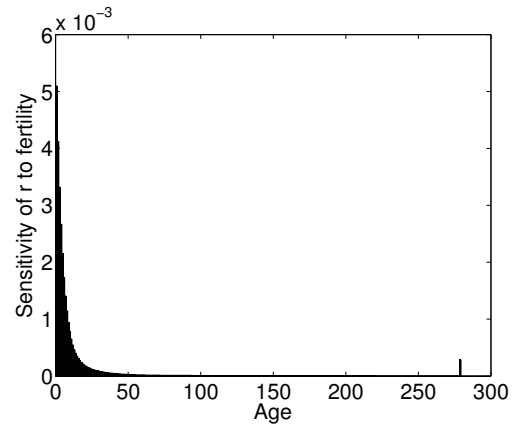

(d) Age-specific fertility

**Figure 64:** Selection gradients on age-specific and stage-specific mortality and fertility.

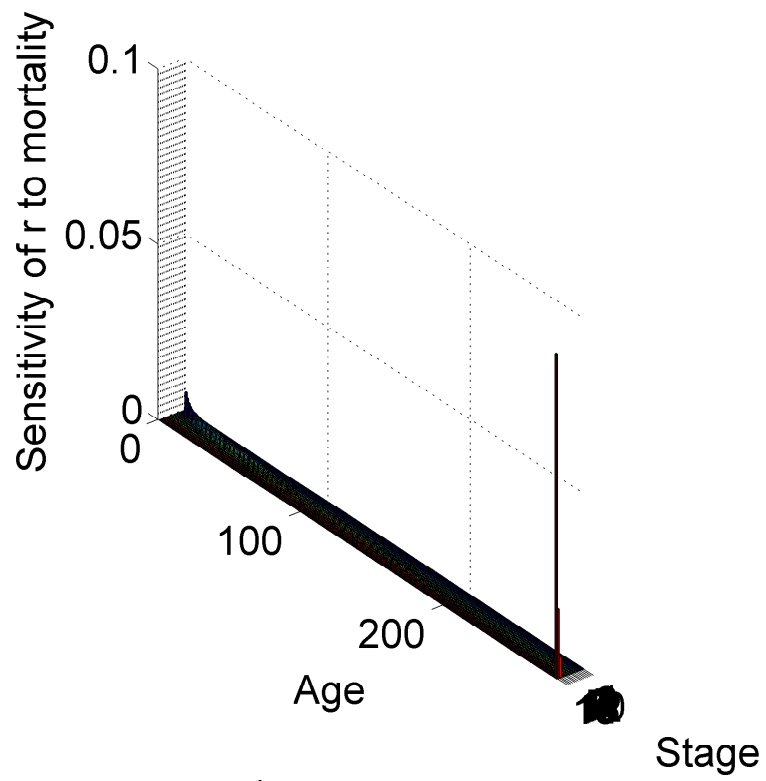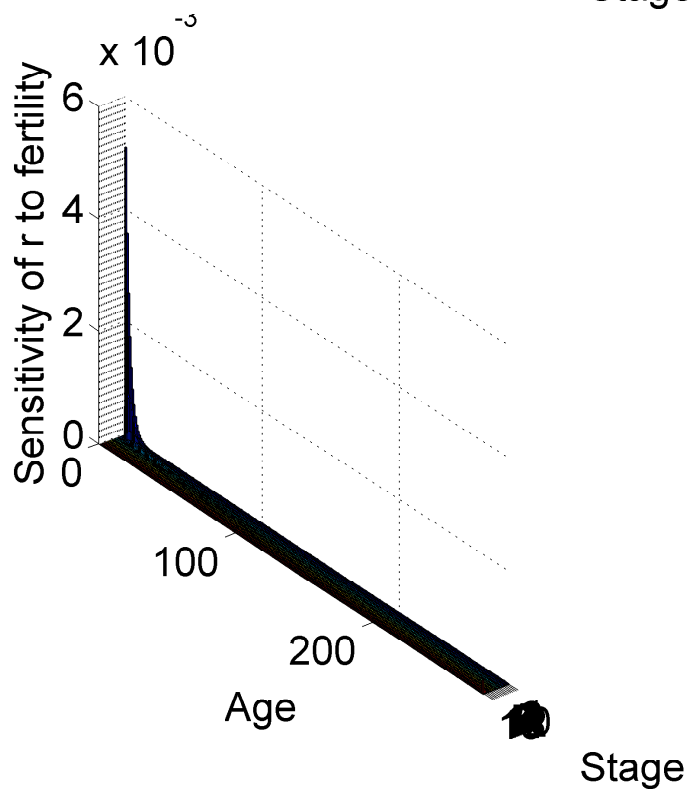

**Figure 65:** Selection gradients on age $\times$ stage-specific mortality and fertility.

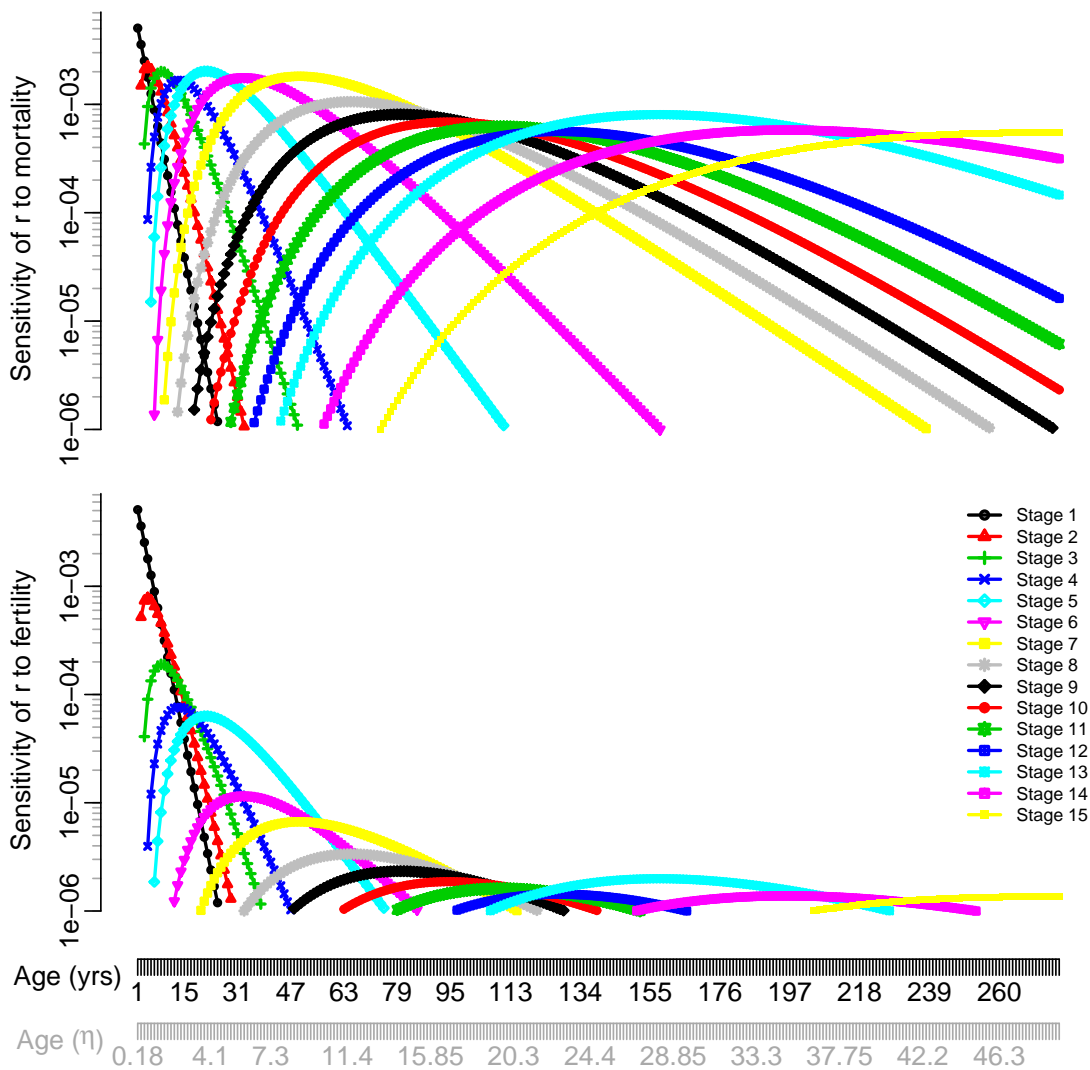

**Figure 66:** Selection gradients on age×stage-specific mortality and fertility. Top  $x$  axis represents age in years, whereas the bottom  $x$  axis represents time-scale normalized by the life expectancy ( $\eta$ ) of the first non-seedbank stage (FNSS) of the species.



S1.23 *Periandra mediterranea*

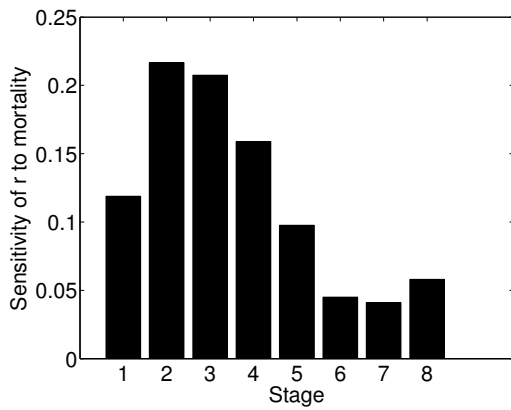

(a) Stage-specific mortality

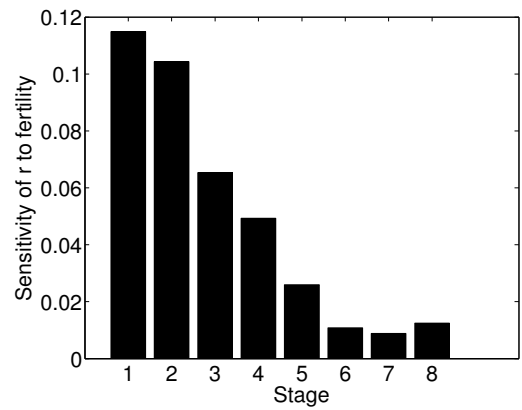

(b) Stage-specific fertility

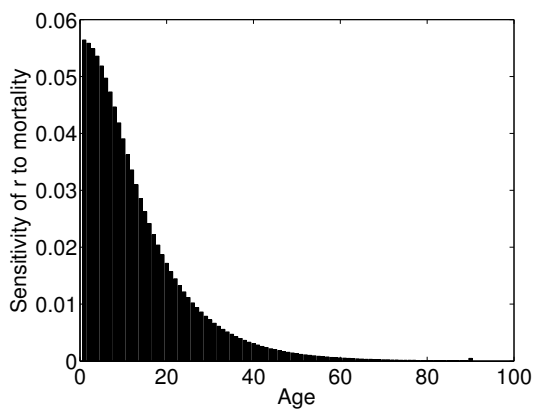

(c) Age-specific mortality

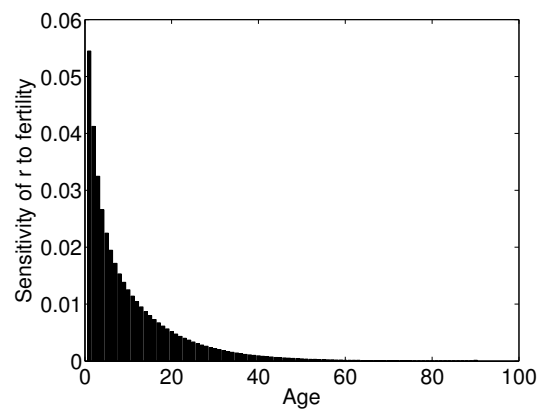

(d) Age-specific fertility

**Figure 67:** Selection gradients on age-specific and stage-specific mortality and fertility.

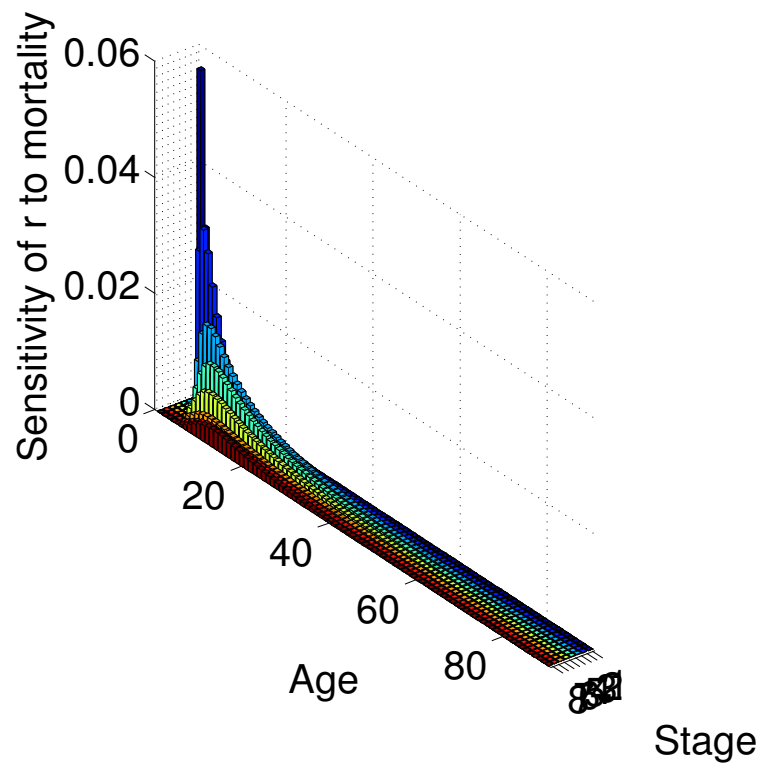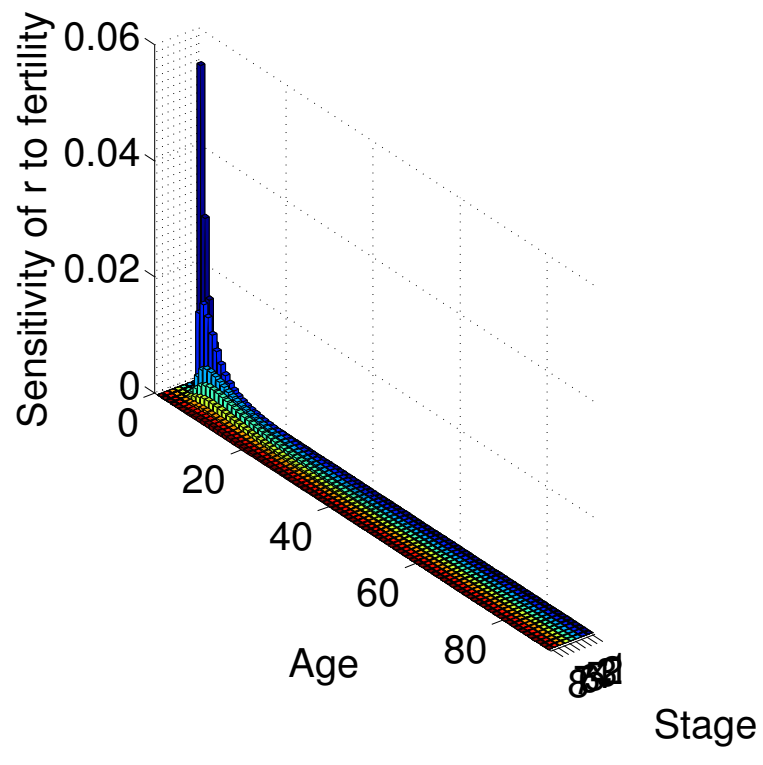

**Figure 68:** Selection gradients on age $\times$ stage-specific mortality and fertility.

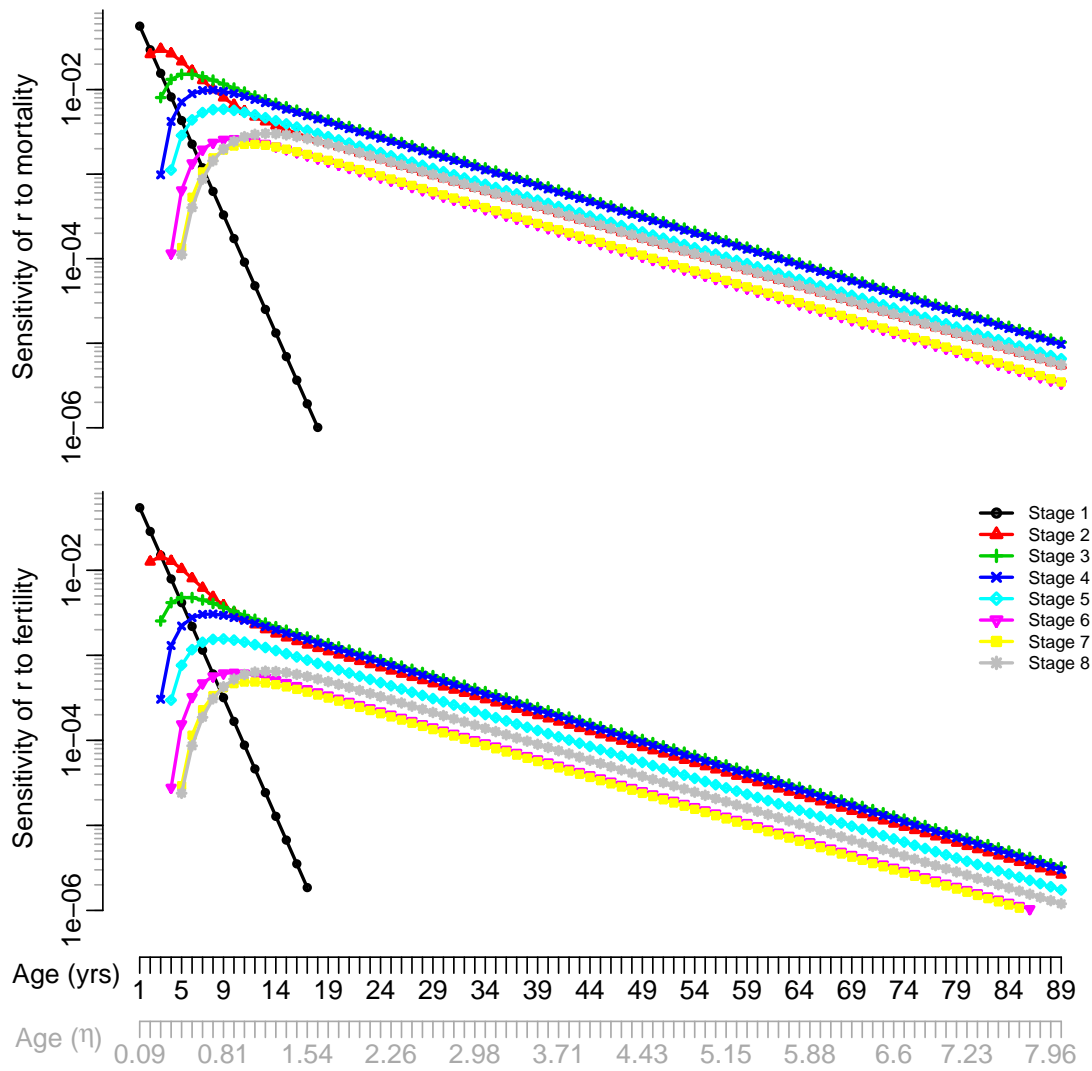

**Figure 69:** Selection gradients on age×stage-specific mortality and fertility. Top  $x$  axis represents age in years, whereas the bottom  $x$  axis represents time-scale normalized by the life expectancy ( $\eta$ ) of the first non-seedbank stage (FNSS) of the species.

S1.24 *Pinguicula alpina*

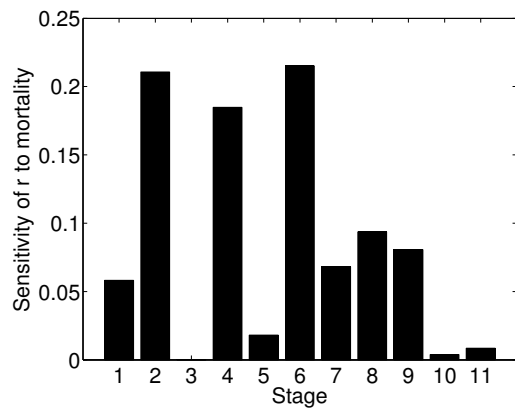

(a) Stage-specific mortality

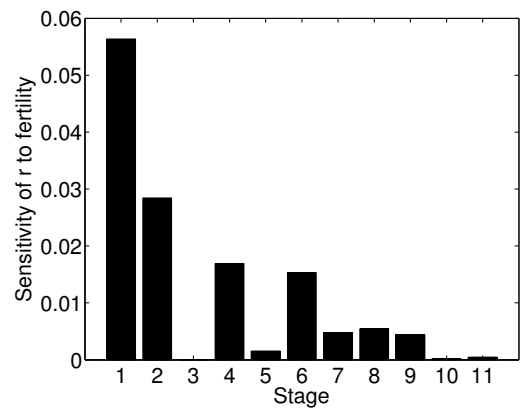

(b) Stage-specific fertility

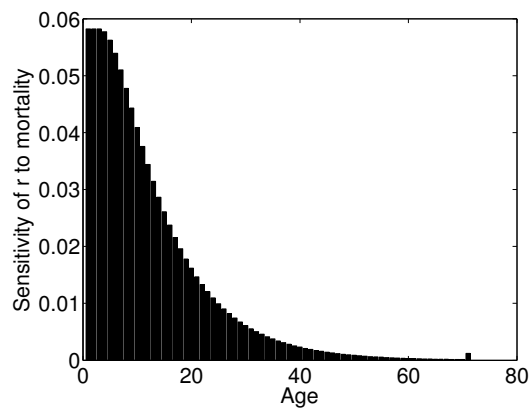

(c) Age-specific mortality

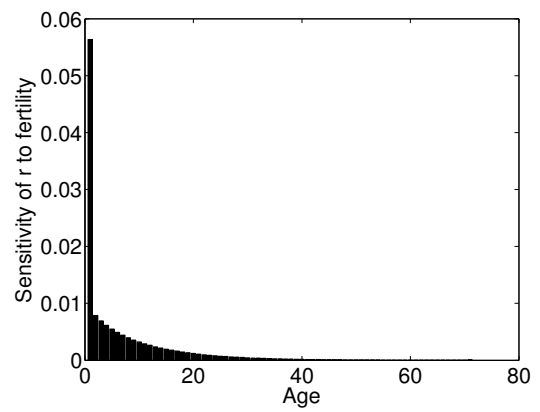

(d) Age-specific fertility

**Figure 70:** Selection gradients on age-specific and stage-specific mortality and fertility.

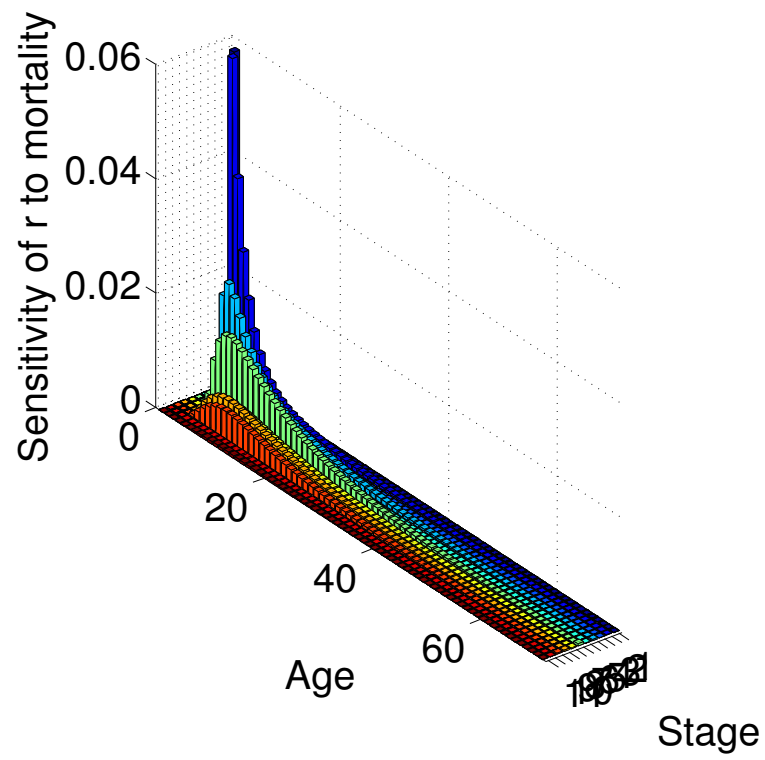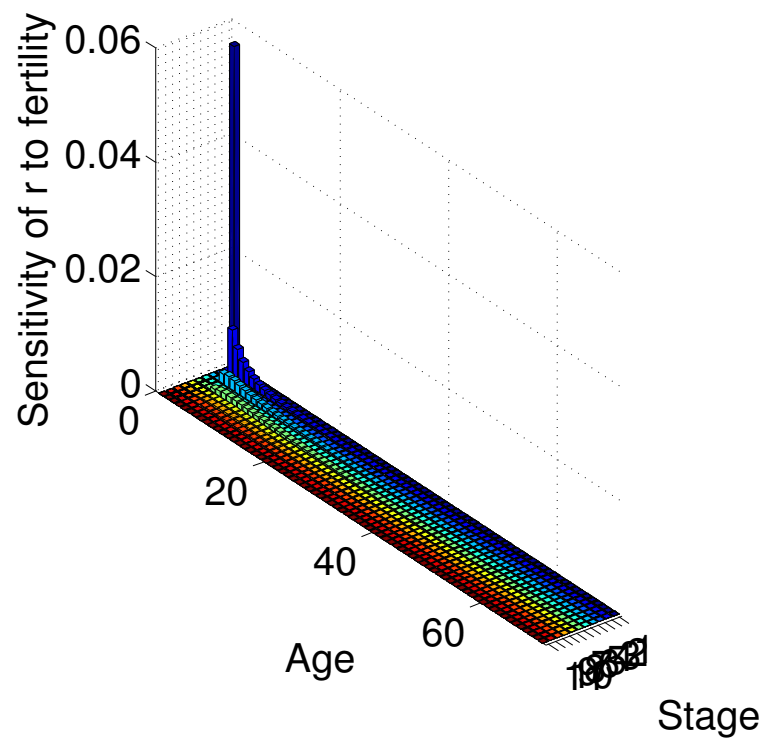

**Figure 71:** Selection gradients on age $\times$ stage-specific mortality and fertility.

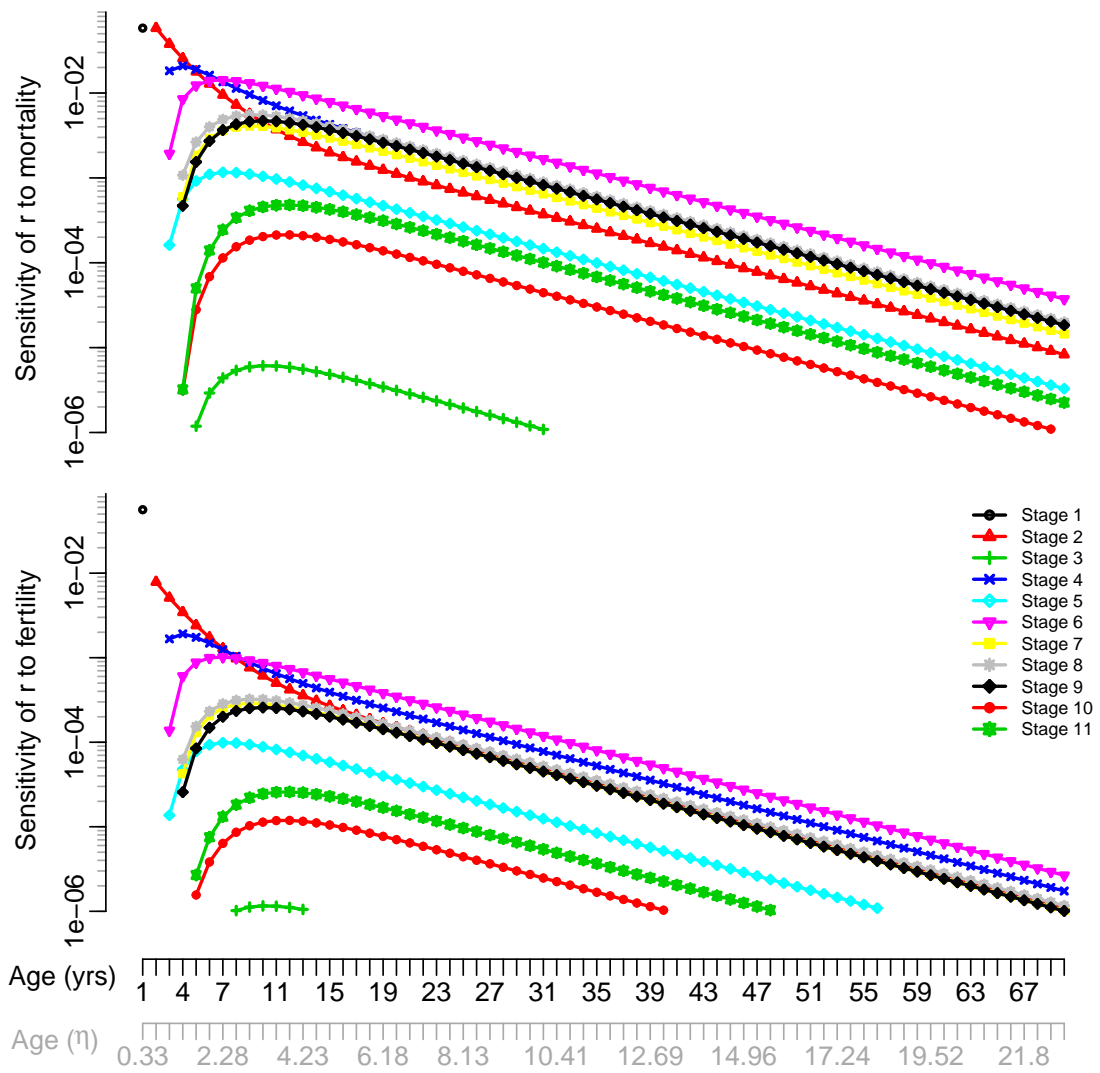

**Figure 72:** Selection gradients on age×stage-specific mortality and fertility. Top  $x$  axis represents age in years, whereas the bottom  $x$  axis represents time-scale normalized by the life expectancy ( $\eta$ ) of the first non-seedbank stage (FNSS) of the species.

S1.25 *Pinus lambertiana*

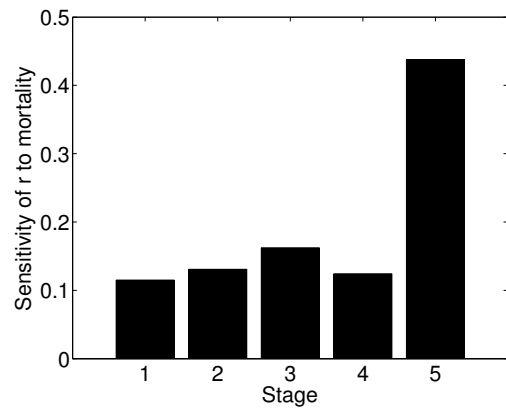

(a) Stage-specific mortality

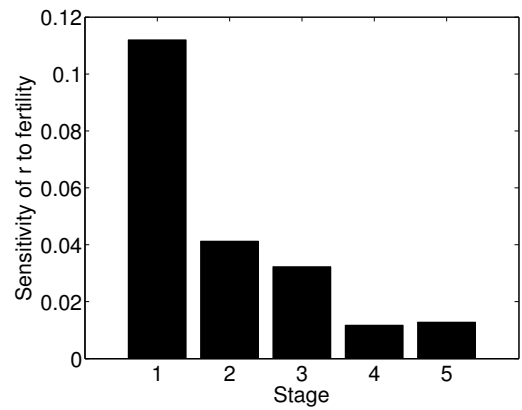

(b) Stage-specific fertility

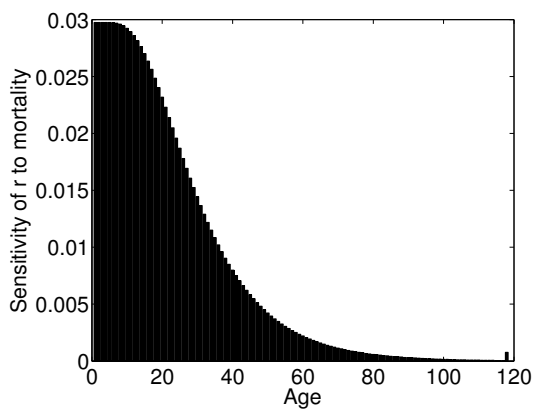

(c) Age-specific mortality

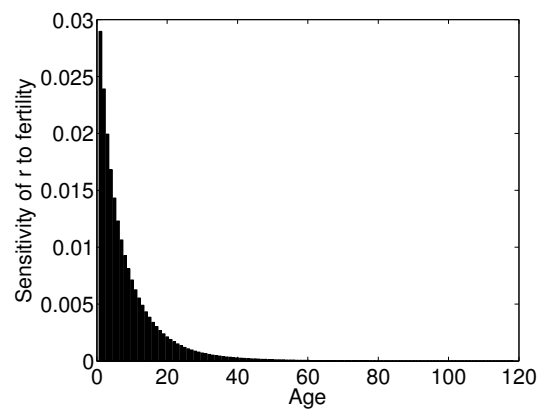

(d) Age-specific fertility

**Figure 73:** Selection gradients on age-specific and stage-specific mortality and fertility.

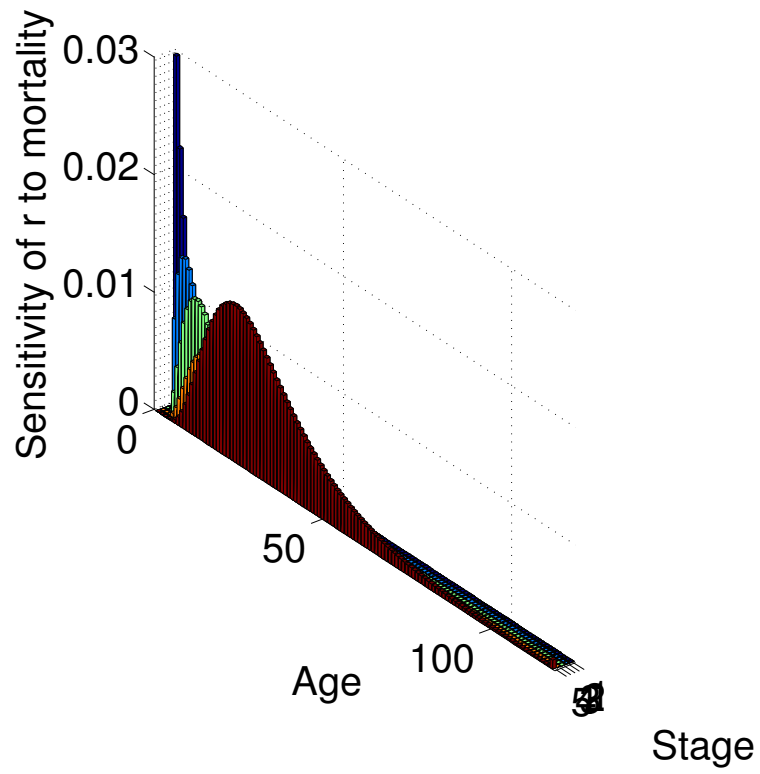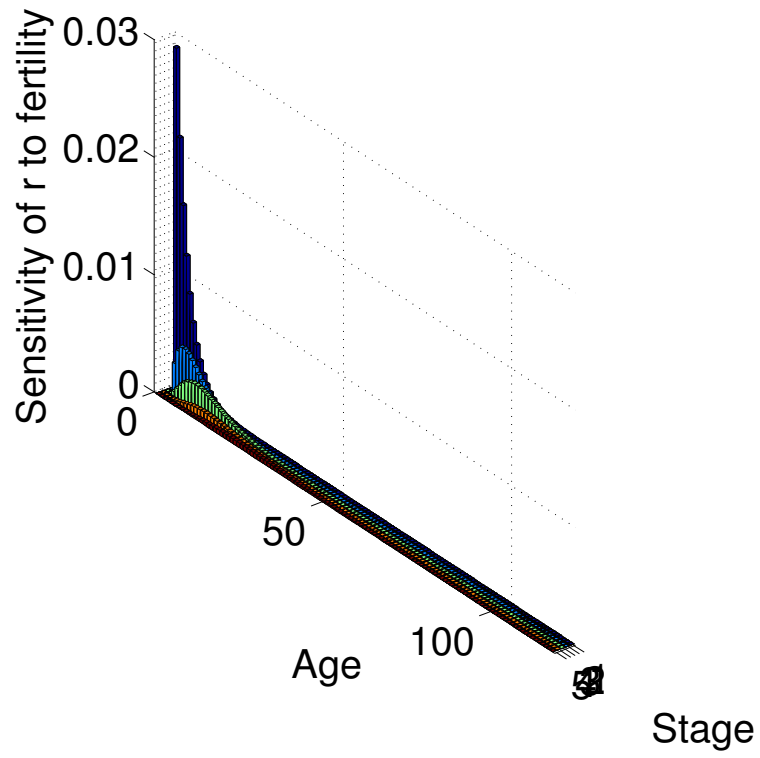

**Figure 74:** Selection gradients on age $\times$ stage-specific mortality and fertility.



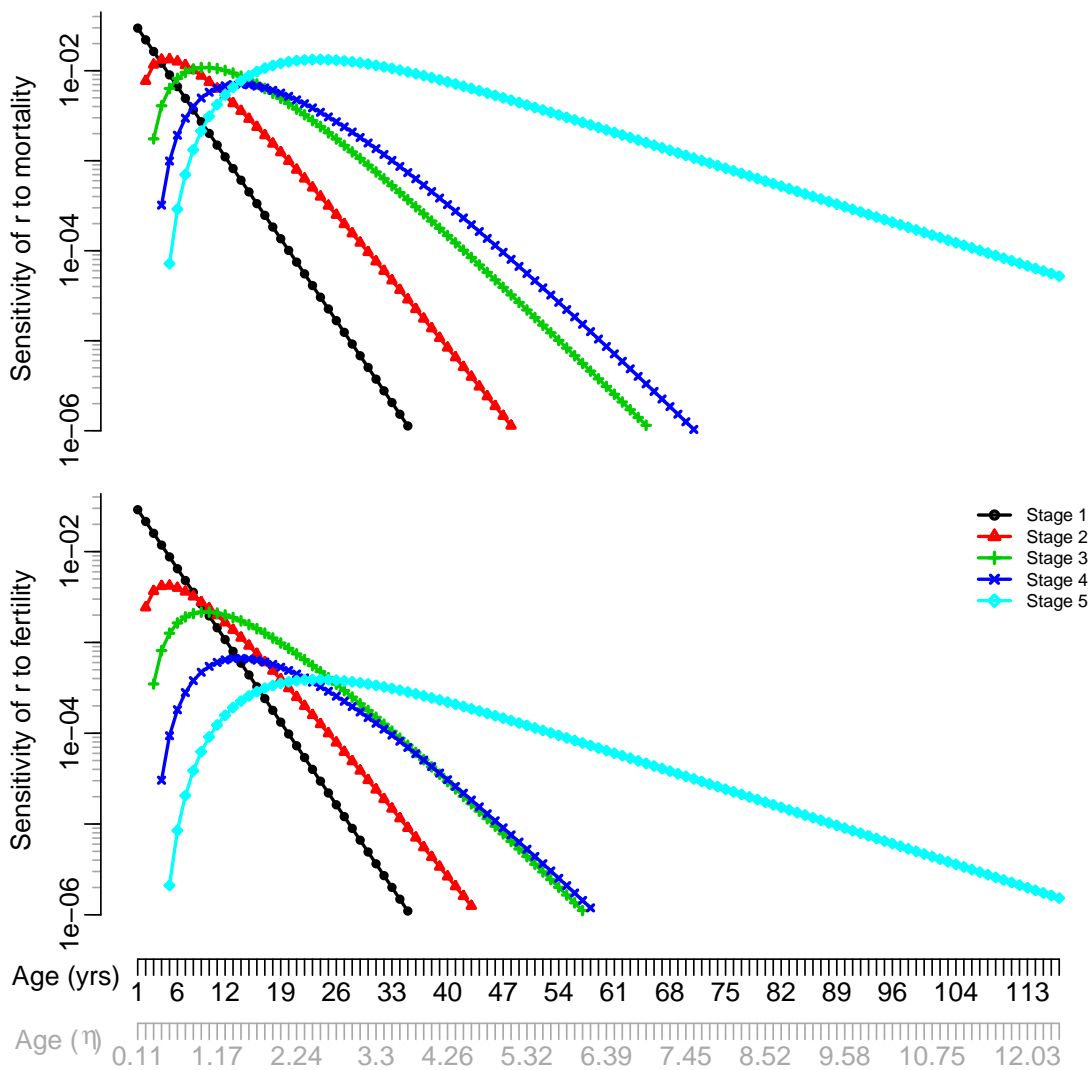

**Figure 75:** Selection gradients on age $\times$ stage-specific mortality and fertility. Top  $x$  axis represents age in years, whereas the bottom  $x$  axis represents time-scale normalized by the life expectancy ( $\eta$ ) of the first non-seedbank stage (FNSS) of the species.

S1.26 *Pinus ponderosa*

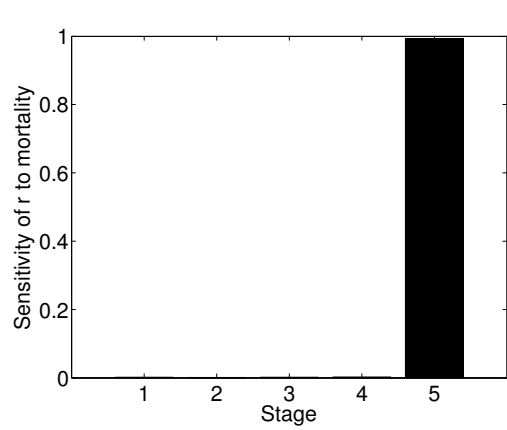

(a) Stage-specific mortality

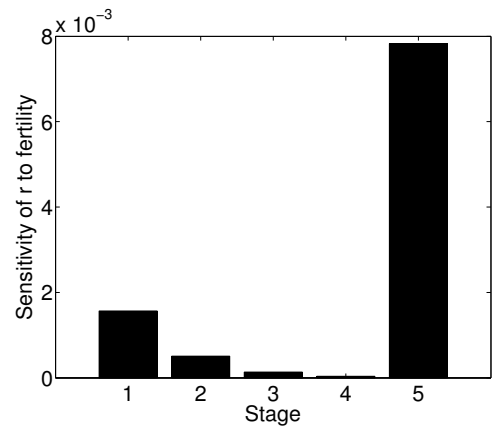

(b) Stage-specific fertility

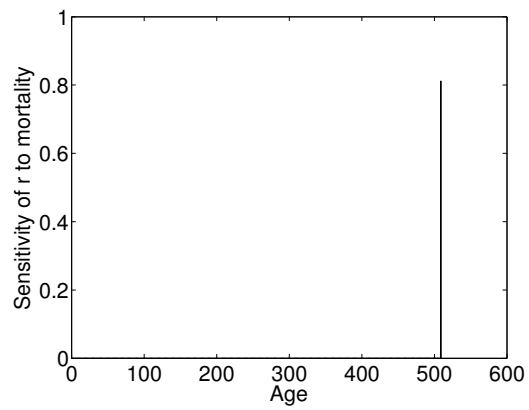

(c) Age-specific mortality

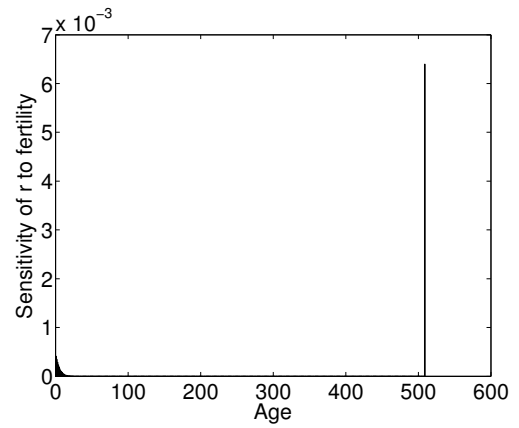

(d) Age-specific fertility

**Figure 76:** Selection gradients on age-specific and stage-specific mortality and fertility.

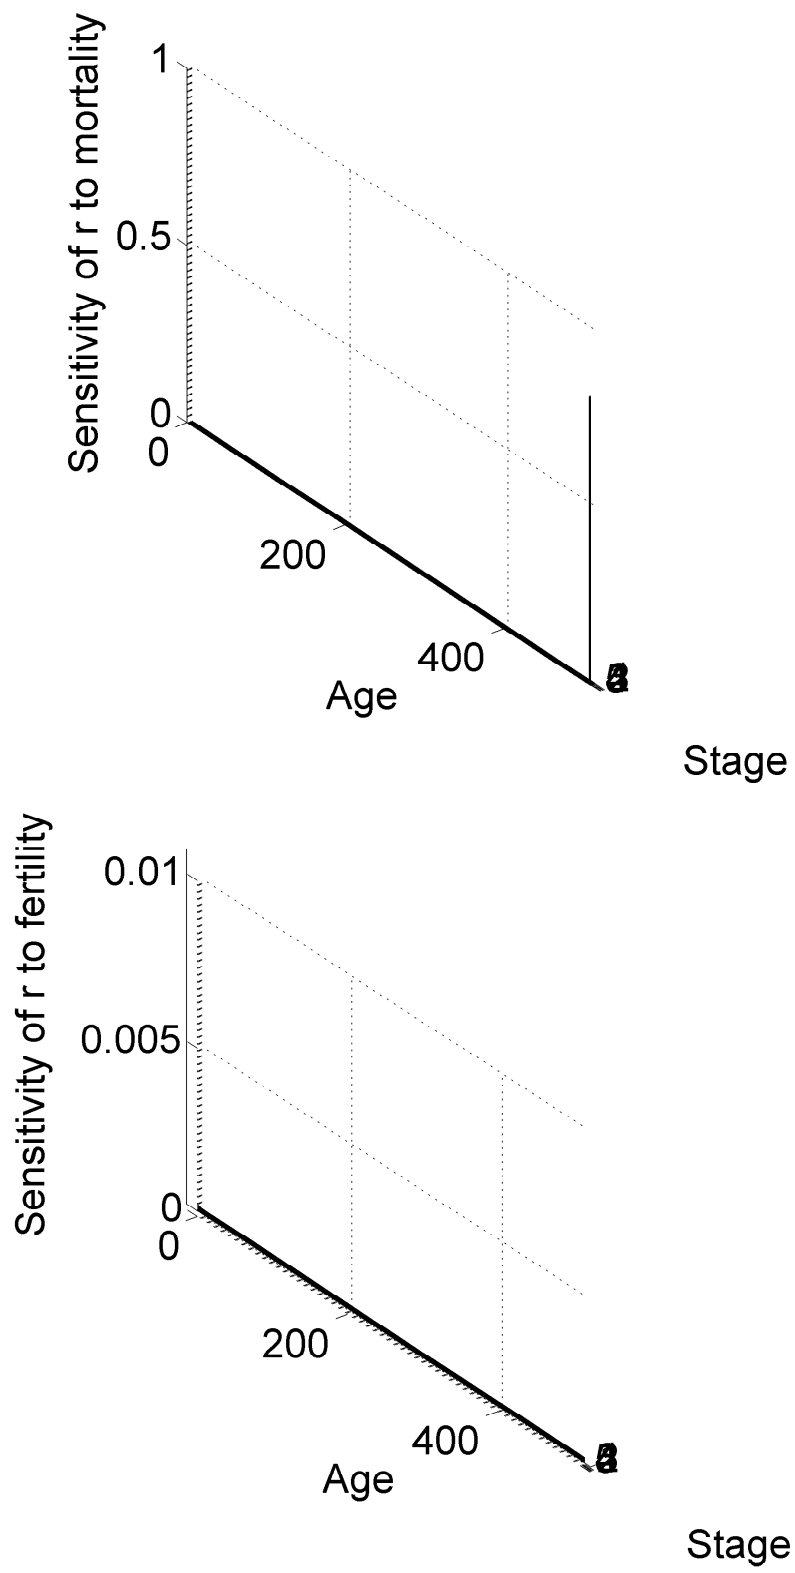

Figure 77: Selection gradients on age $\times$ stage-specific mortality and fertility.

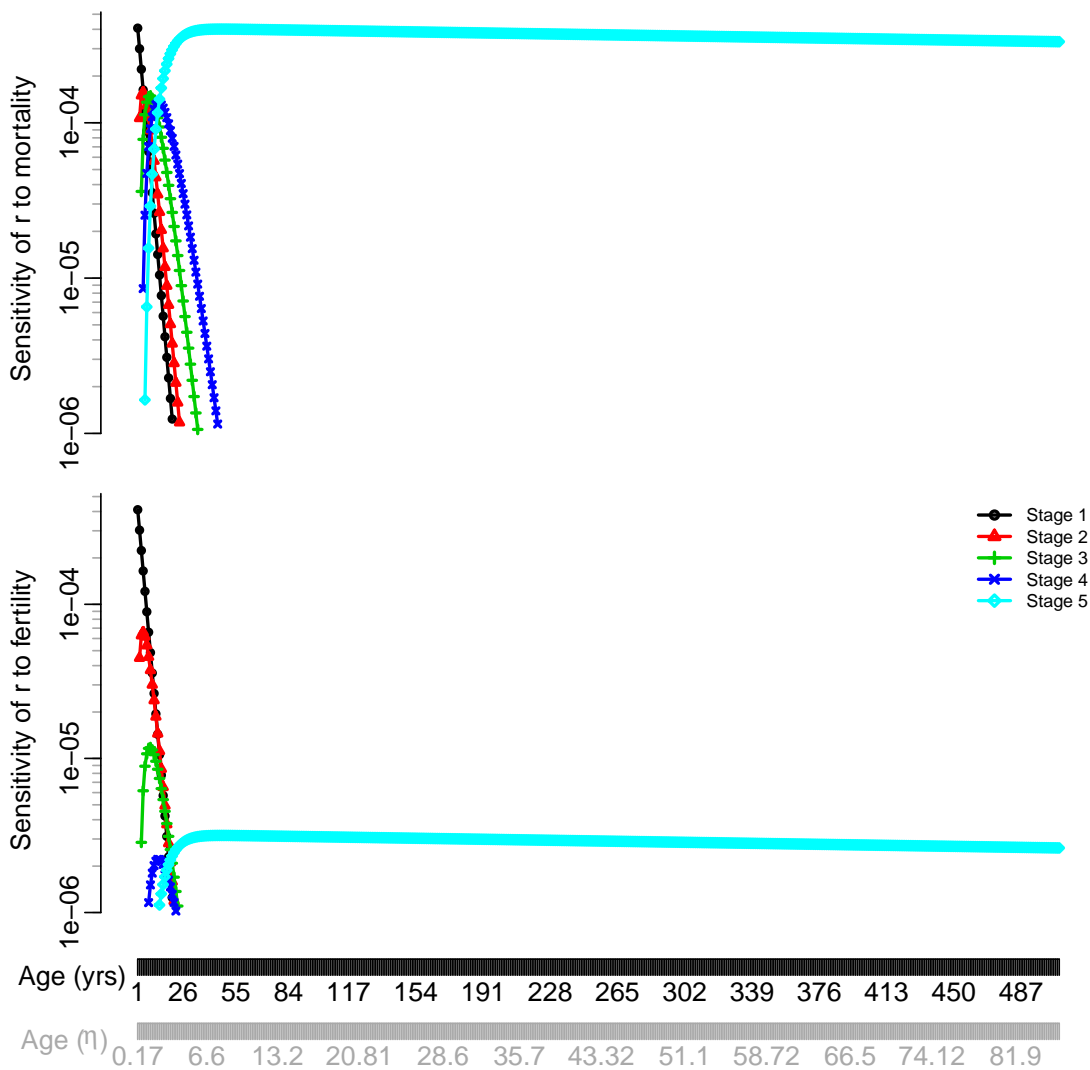

**Figure 78:** Selection gradients on age×stage-specific mortality and fertility. Top  $x$  axis represents age in years, whereas the bottom  $x$  axis represents time-scale normalized by the life expectancy ( $\eta$ ) of the first non-seedbank stage (FNSS) of the species.

S1.27 *Polystichum aculeatum*

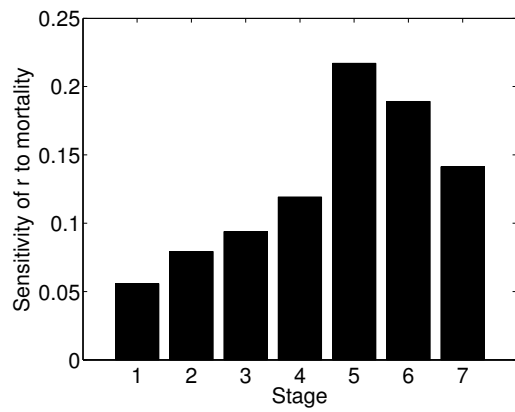

(a) Stage-specific mortality

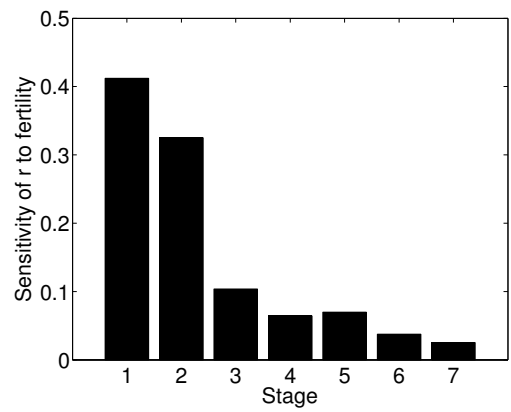

(b) Stage-specific fertility

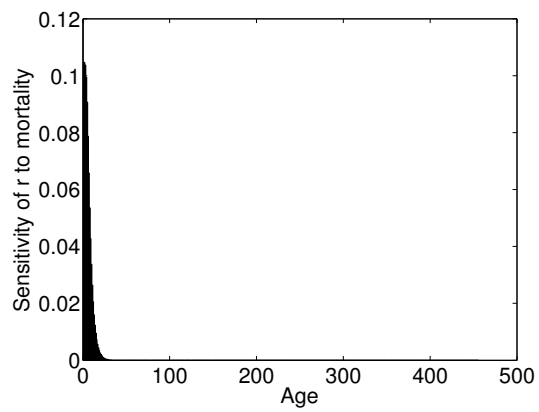

(c) Age-specific mortality

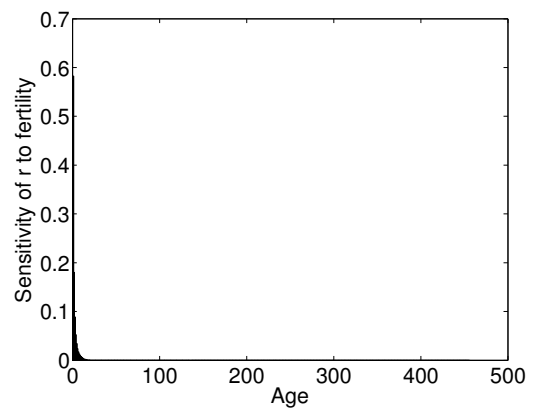

(d) Age-specific fertility

**Figure 79:** Selection gradients on age-specific and stage-specific mortality and fertility.

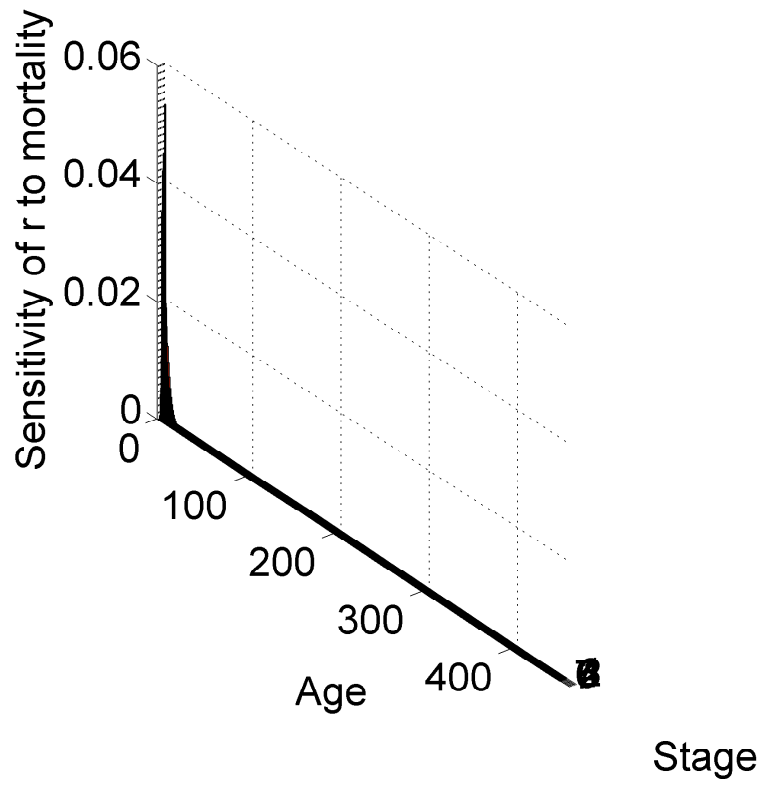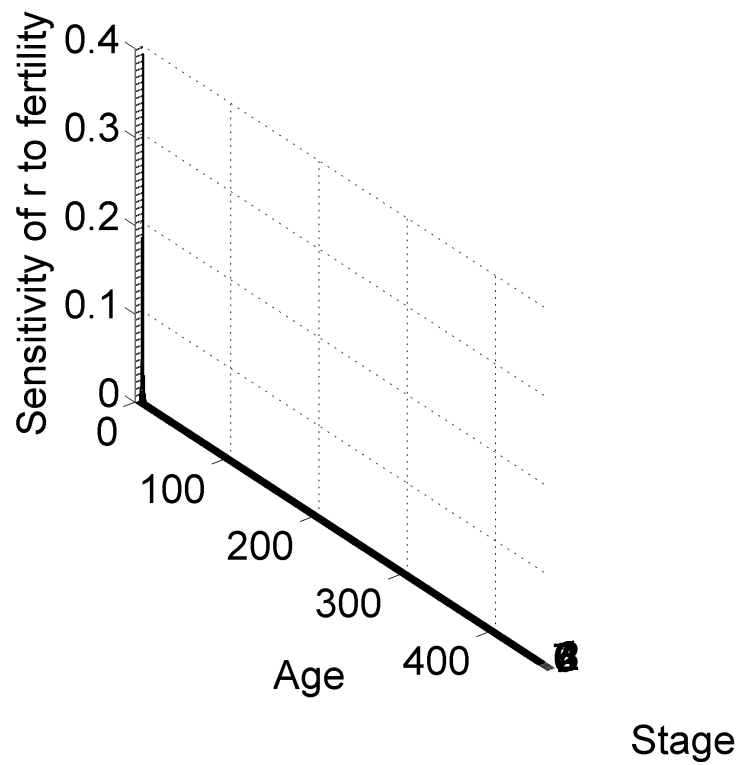

**Figure 80:** Selection gradients on age $\times$ stage-specific mortality and fertility.

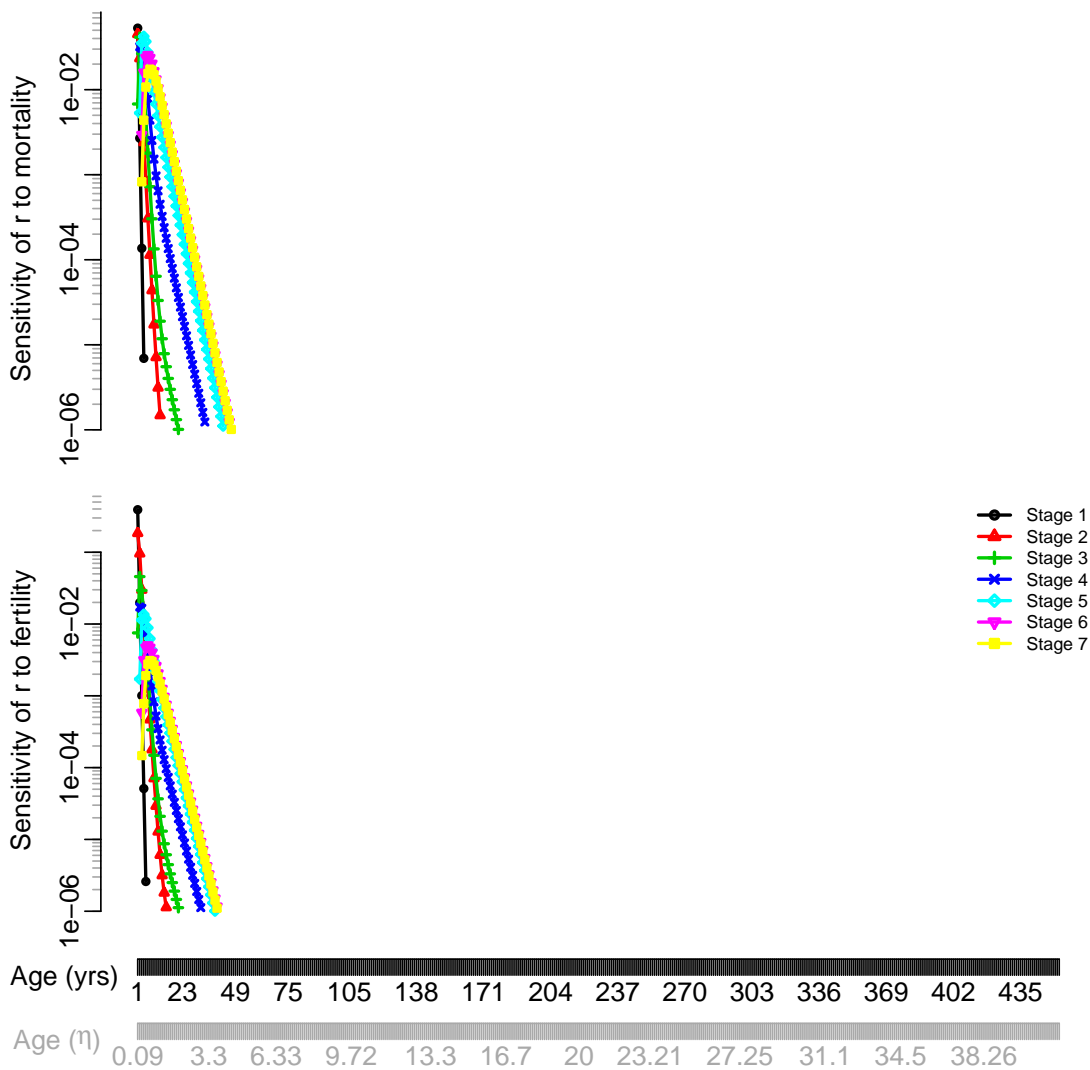

**Figure 81:** Selection gradients on age×stage-specific mortality and fertility. Top  $x$  axis represents age in years, whereas the bottom  $x$  axis represents time-scale normalized by the life expectancy ( $\eta$ ) of the first non-seedbank stage (FNSS) of the species.

S1.28 *Primula vulgaris*

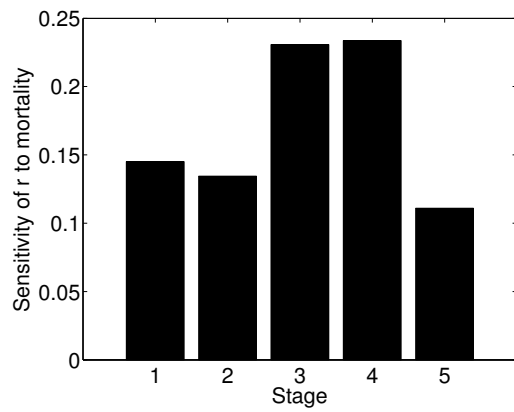

(a) Stage-specific mortality

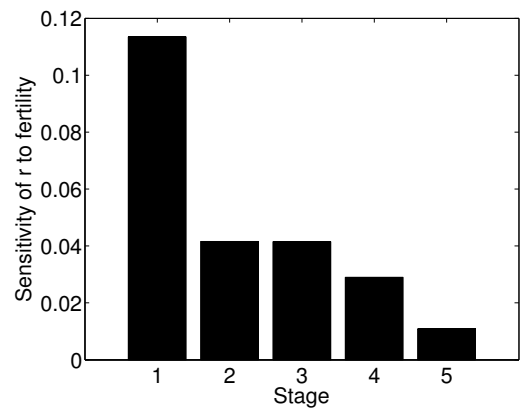

(b) Stage-specific fertility

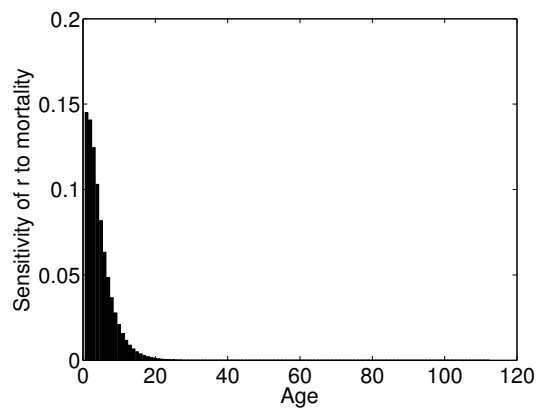

(c) Age-specific mortality

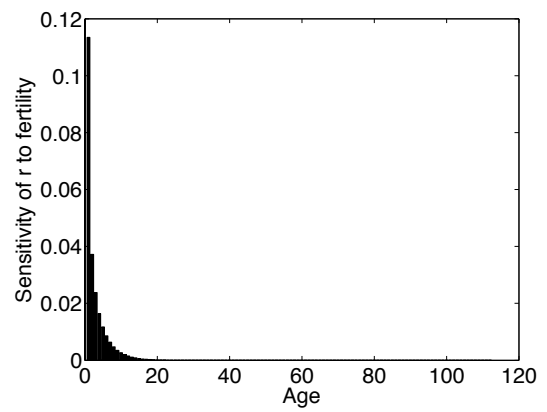

(d) Age-specific fertility

**Figure 82:** Selection gradients on age-specific and stage-specific mortality and fertility.



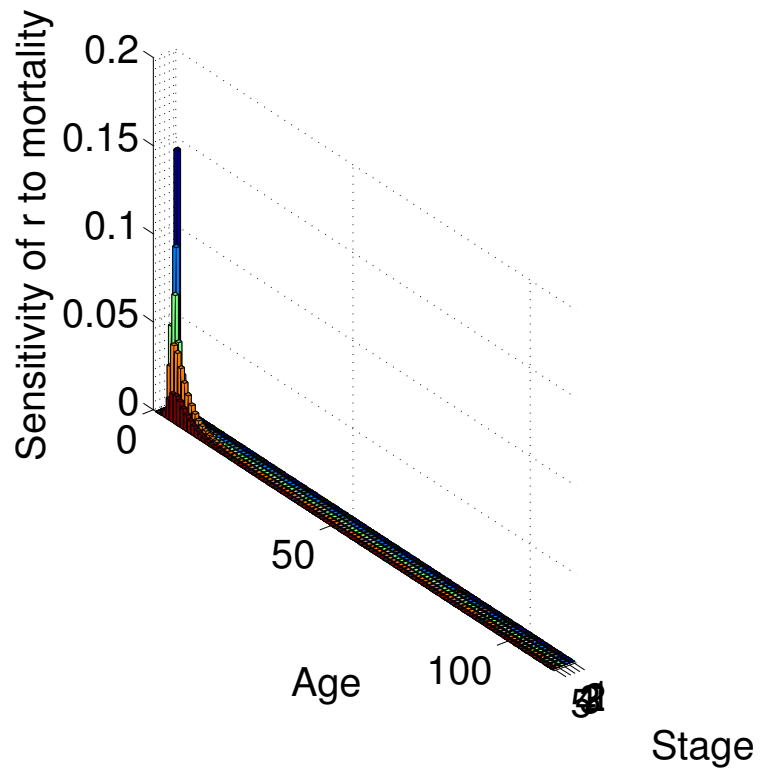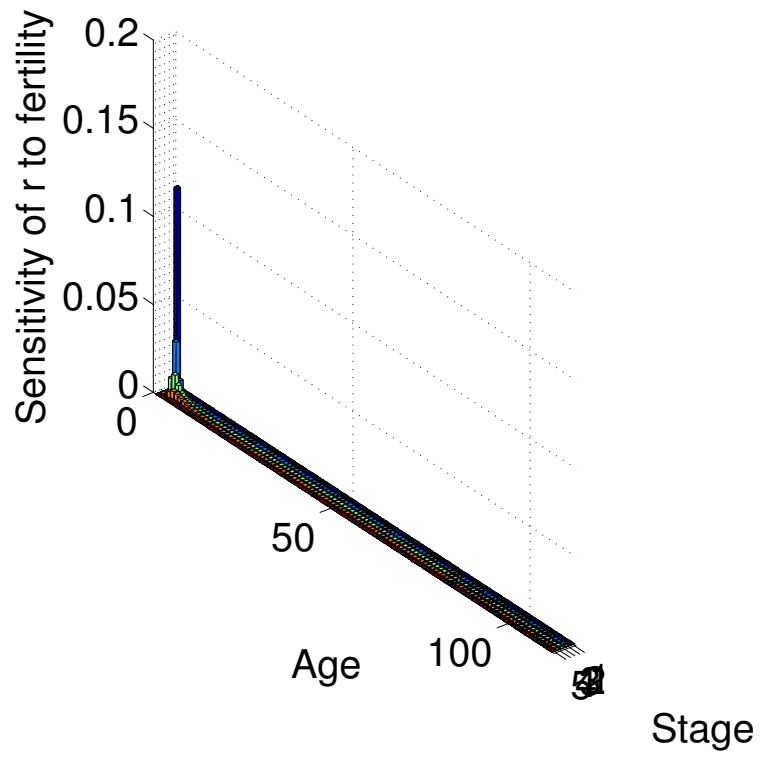

**Figure 83:** Selection gradients on age $\times$ stage-specific mortality and fertility.

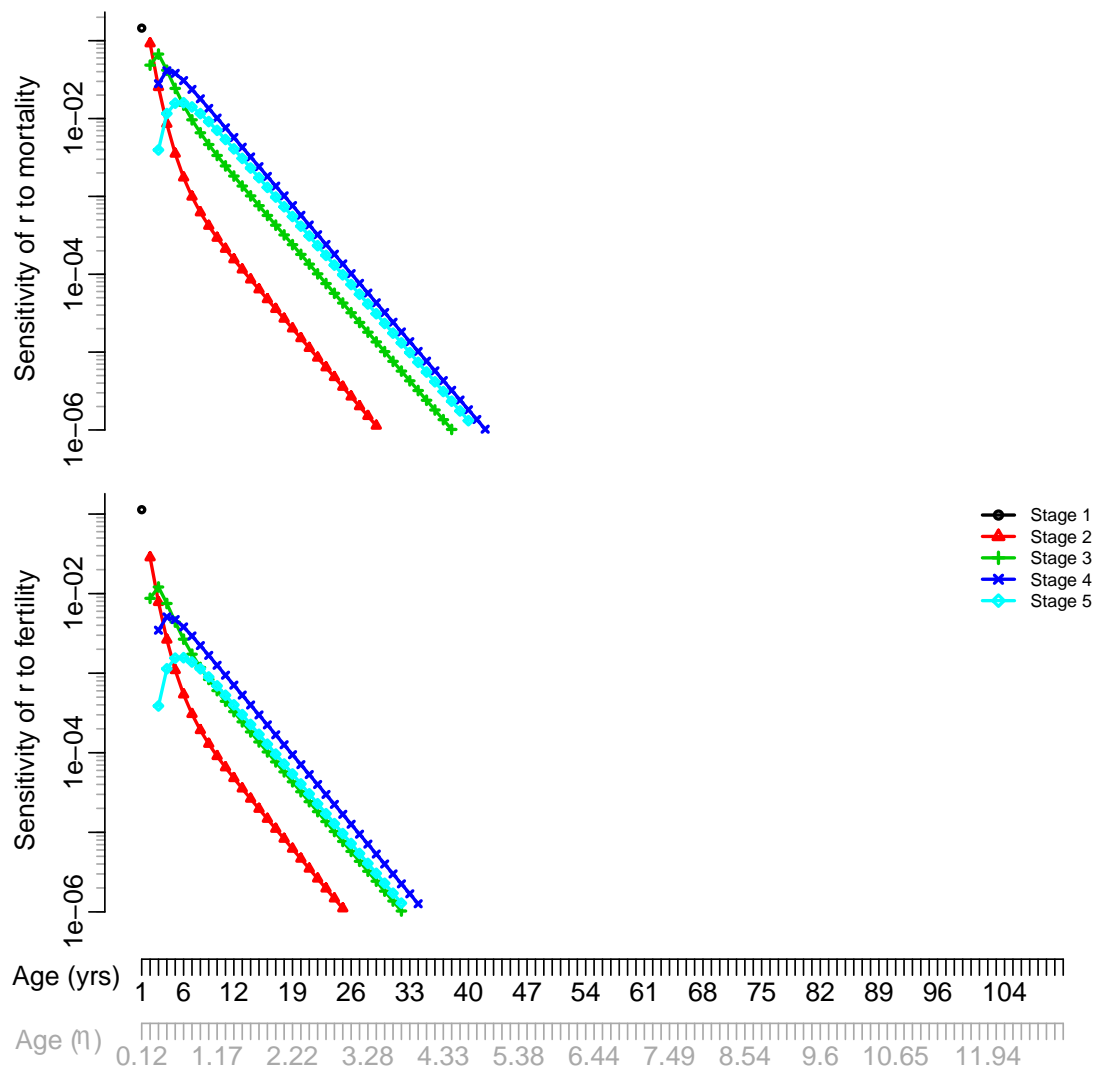

**Figure 84:** Selection gradients on age×stage-specific mortality and fertility. Top  $x$  axis represents age in years, whereas the bottom  $x$  axis represents time-scale normalized by the life expectancy ( $\eta$ ) of the first non-seedbank stage (FNSS) of the species.

S1.29 *Pterocarpus angolensis*

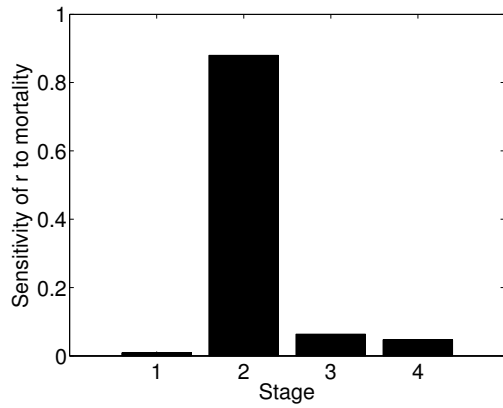

(a) Stage-specific mortality

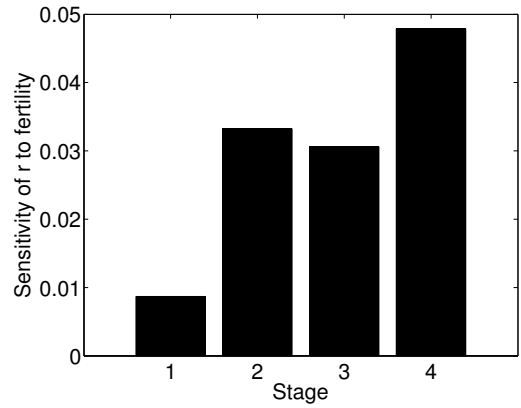

(b) Stage-specific fertility

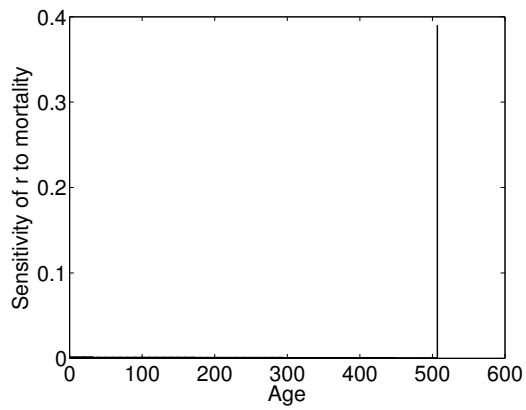

(c) Age-specific mortality

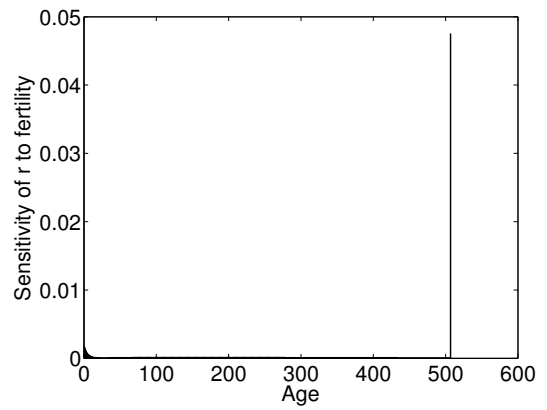

(d) Age-specific fertility

**Figure 85:** Selection gradients on age-specific and stage-specific mortality and fertility.

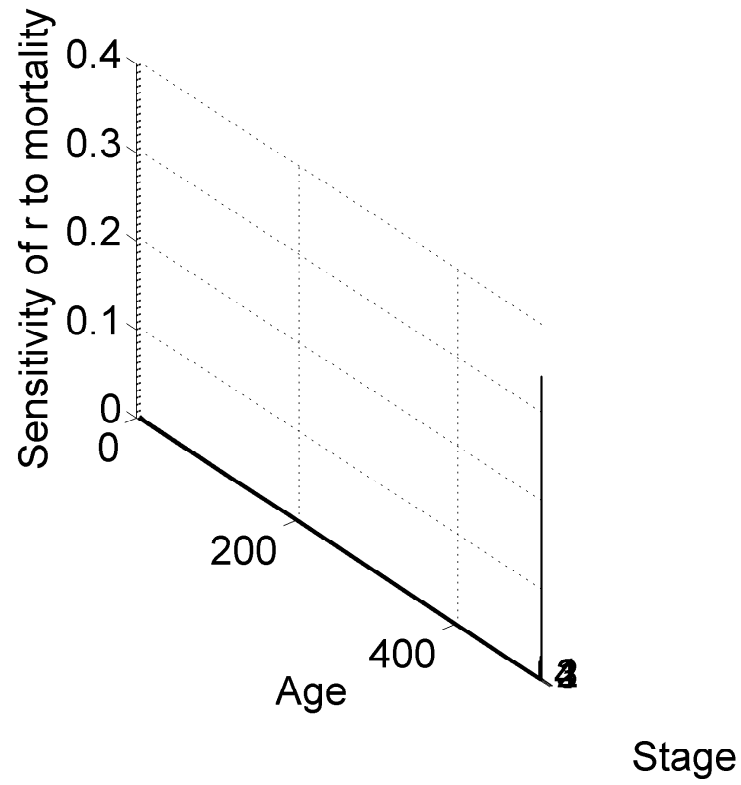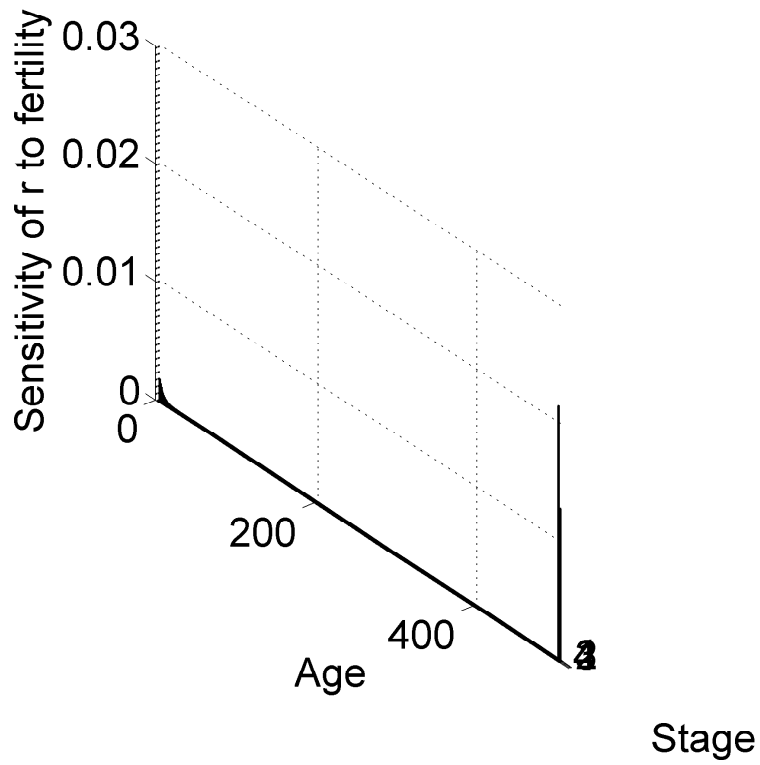

**Figure 86:** Selection gradients on age×stage-specific mortality and fertility.

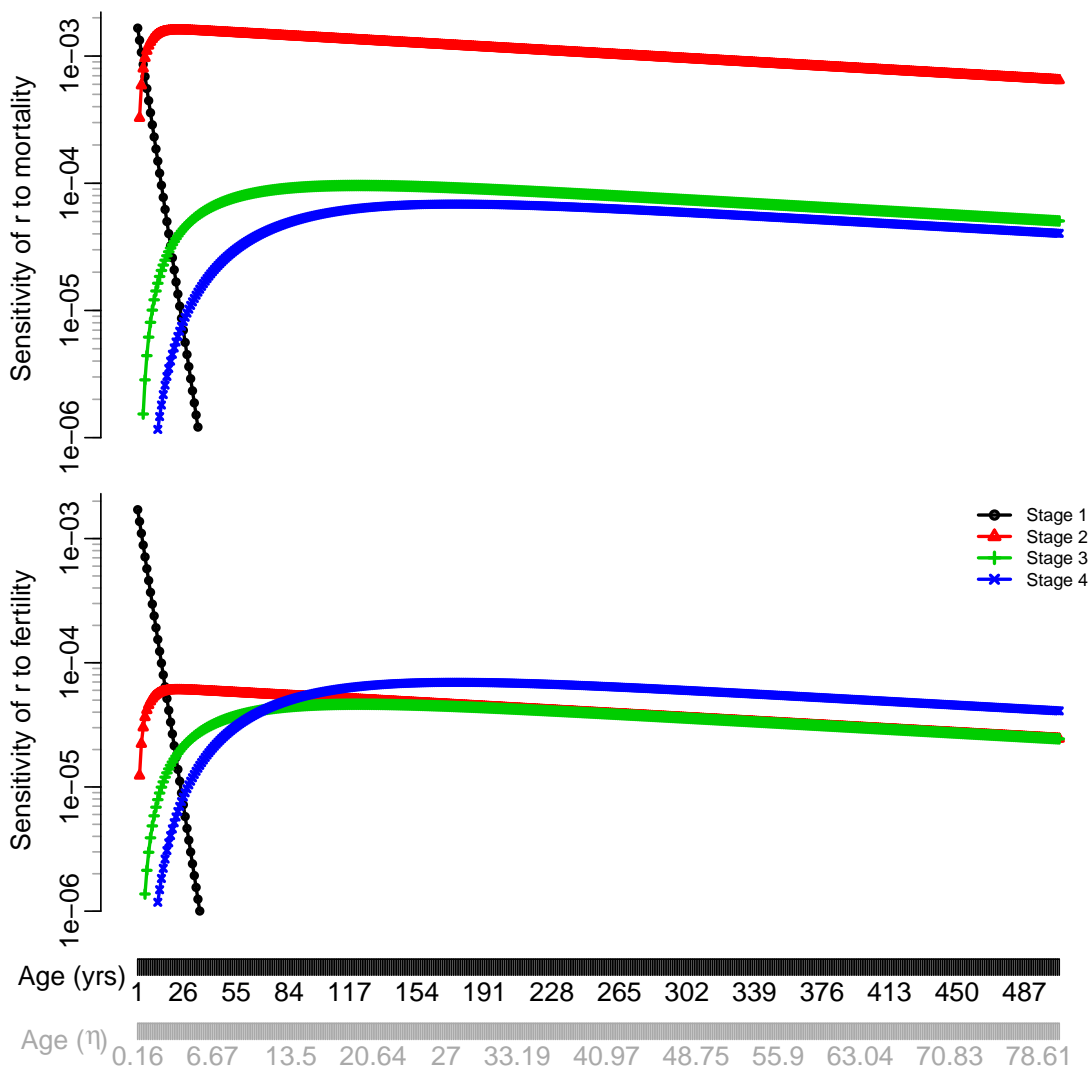

**Figure 87:** Selection gradients on age×stage-specific mortality and fertility. Top  $x$  axis represents age in years, whereas the bottom  $x$  axis represents time-scale normalized by the life expectancy ( $\eta$ ) of the first non-seedbank stage (FNSS) of the species.

S1.30 *Pterocarya rhoifolia*

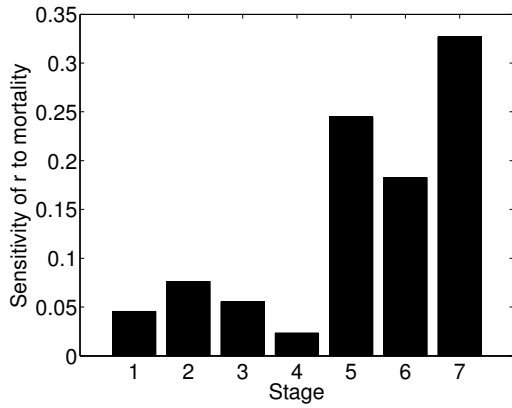

(a) Stage-specific mortality

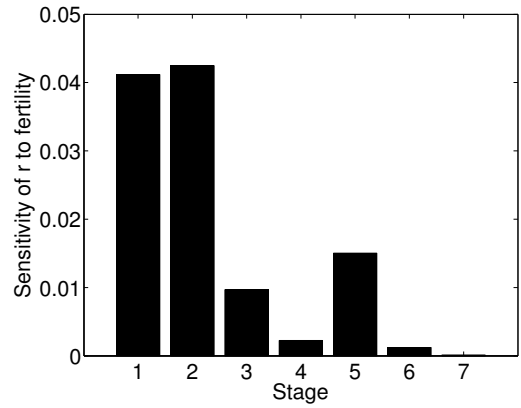

(b) Stage-specific fertility

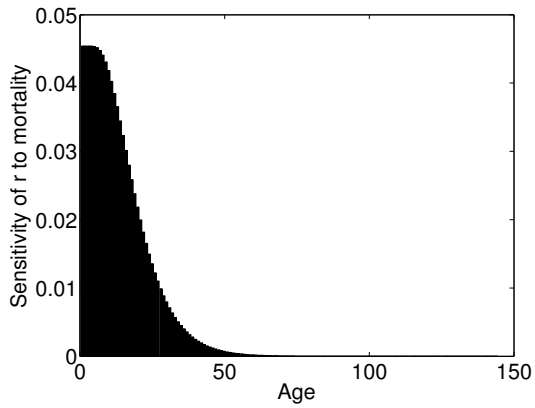

(c) Age-specific mortality

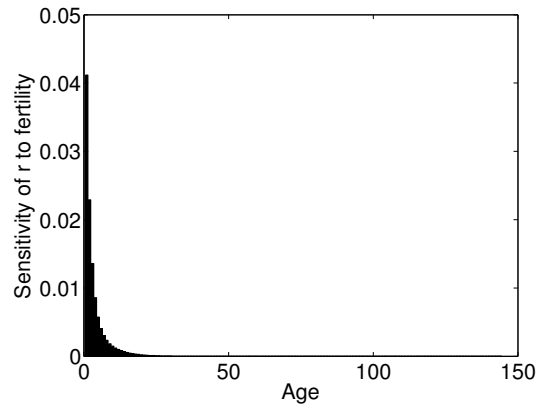

(d) Age-specific fertility

**Figure 88:** Selection gradients on age-specific and stage-specific mortality and fertility.

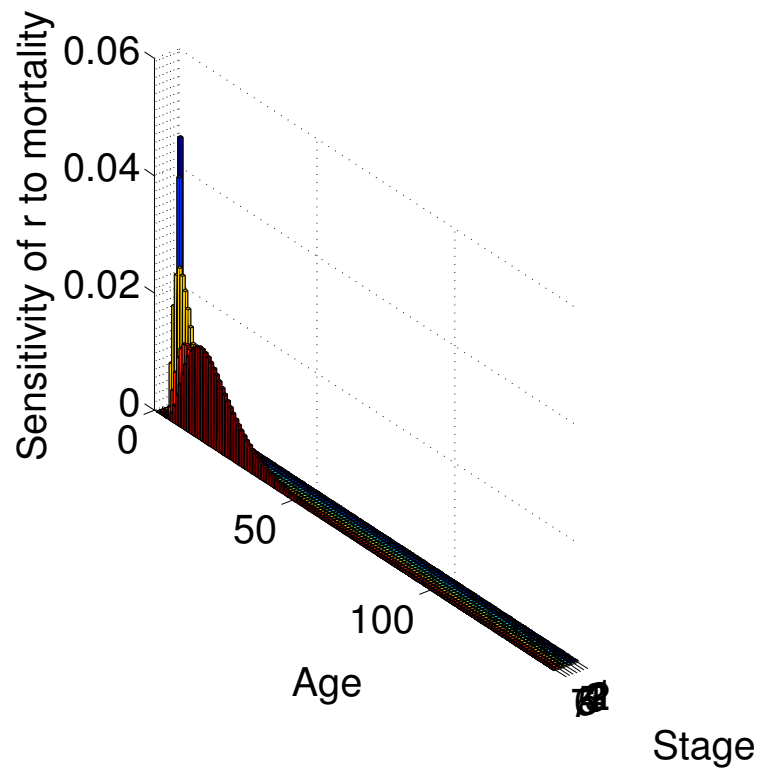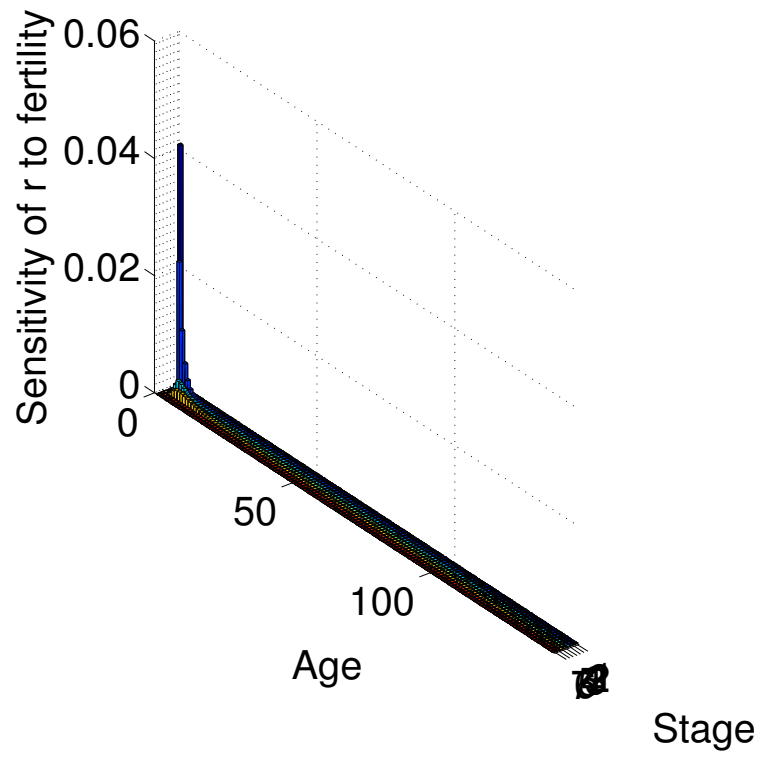

**Figure 89:** Selection gradients on age×stage-specific mortality and fertility.

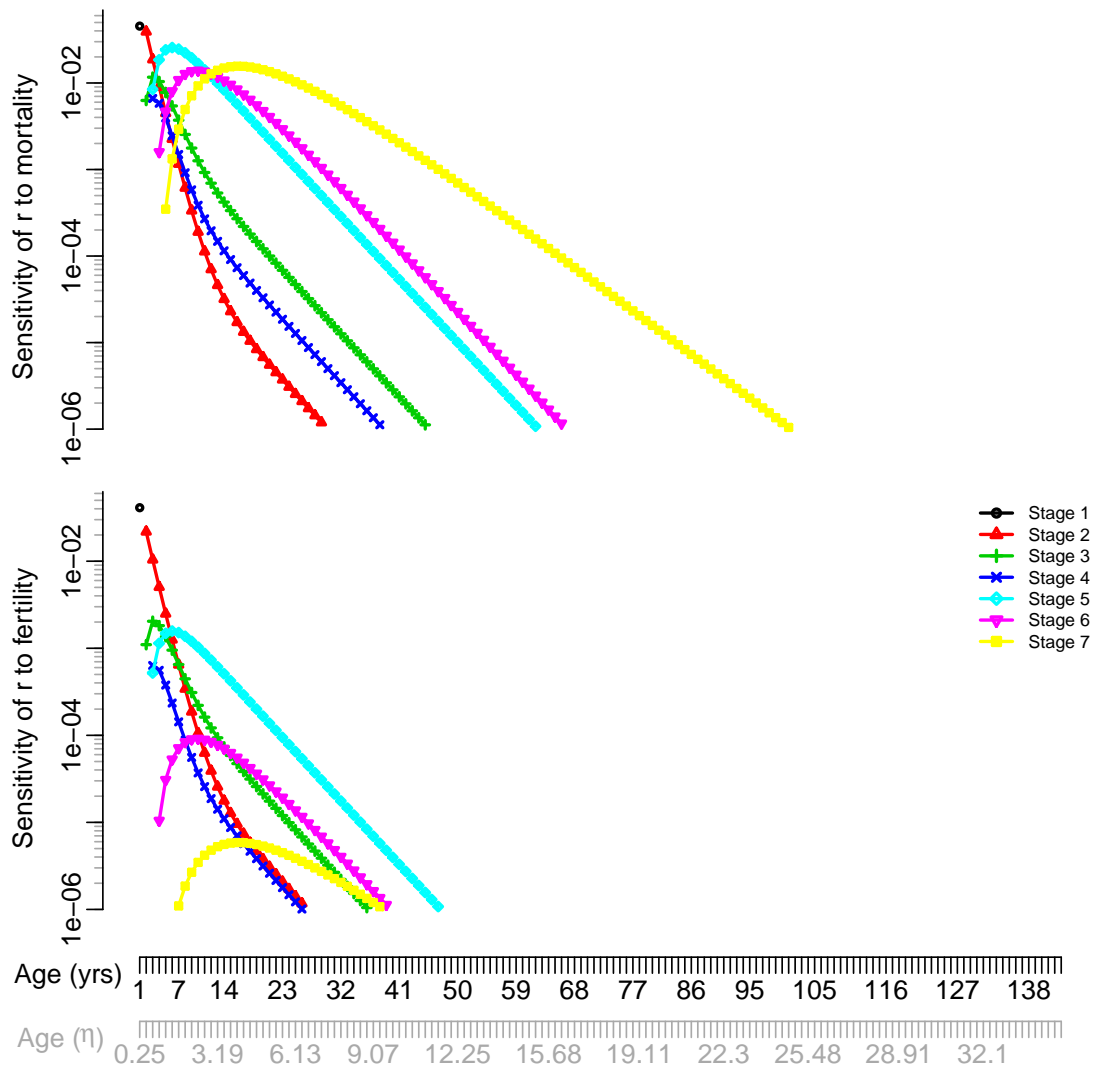

**Figure 90:** Selection gradients on age×stage-specific mortality and fertility. Top  $x$  axis represents age in years, whereas the bottom  $x$  axis represents time-scale normalized by the life expectancy ( $\eta$ ) of the first non-seedbank stage (FNSS) of the species.



S1.31 *Rhododendron ponticum* (Endangered)

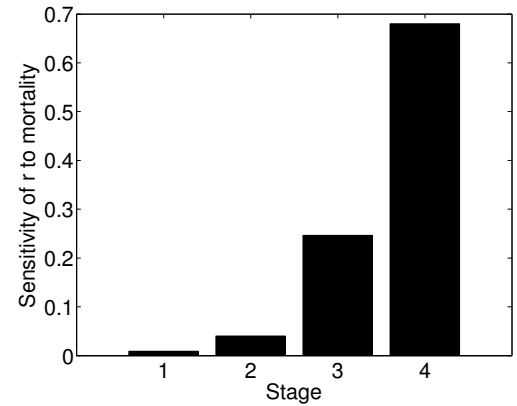

(a) Stage-specific mortality

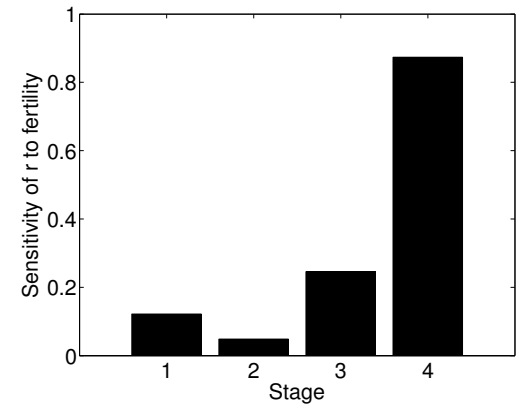

(b) Stage-specific fertility

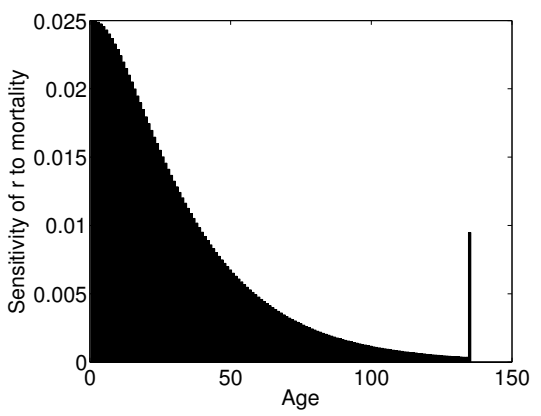

(c) Age-specific mortality

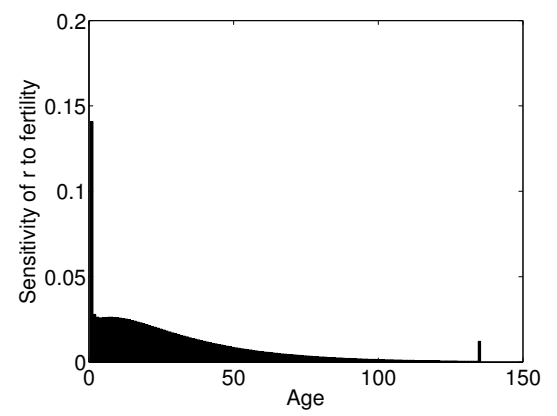

(d) Age-specific fertility

**Figure 91:** Selection gradients on age-specific and stage-specific mortality and fertility.

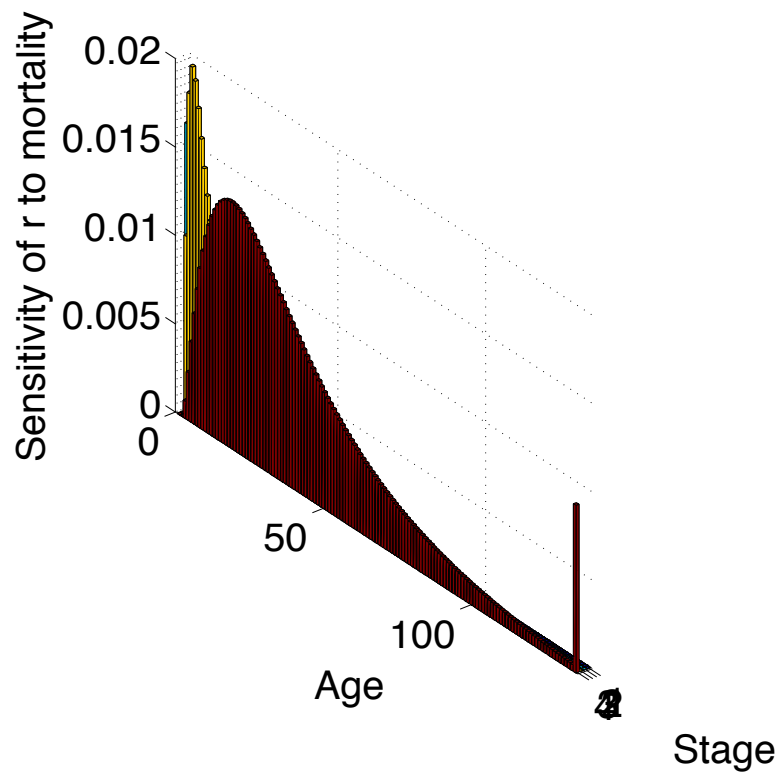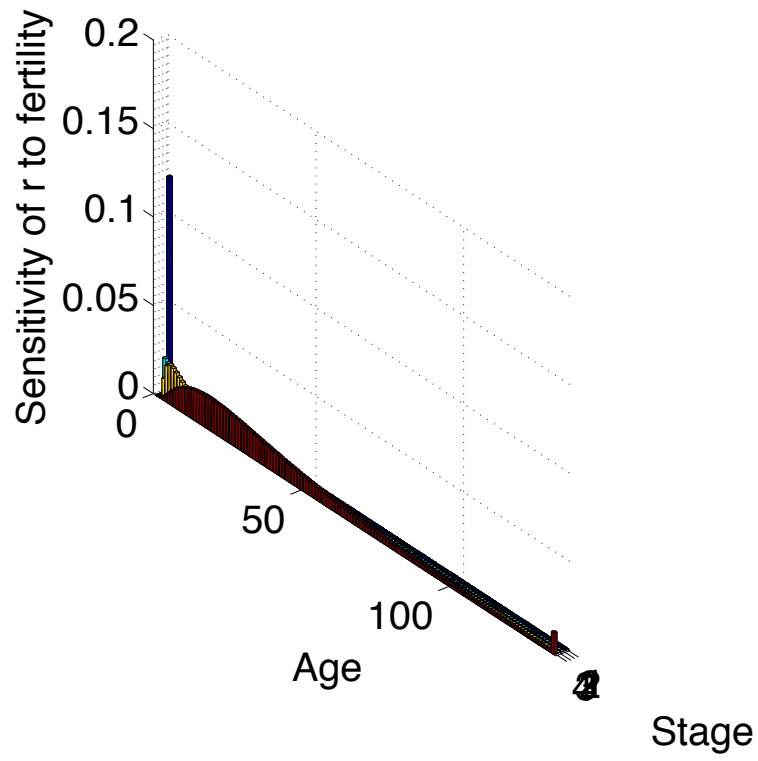

**Figure 92:** Selection gradients on age×stage-specific mortality and fertility.

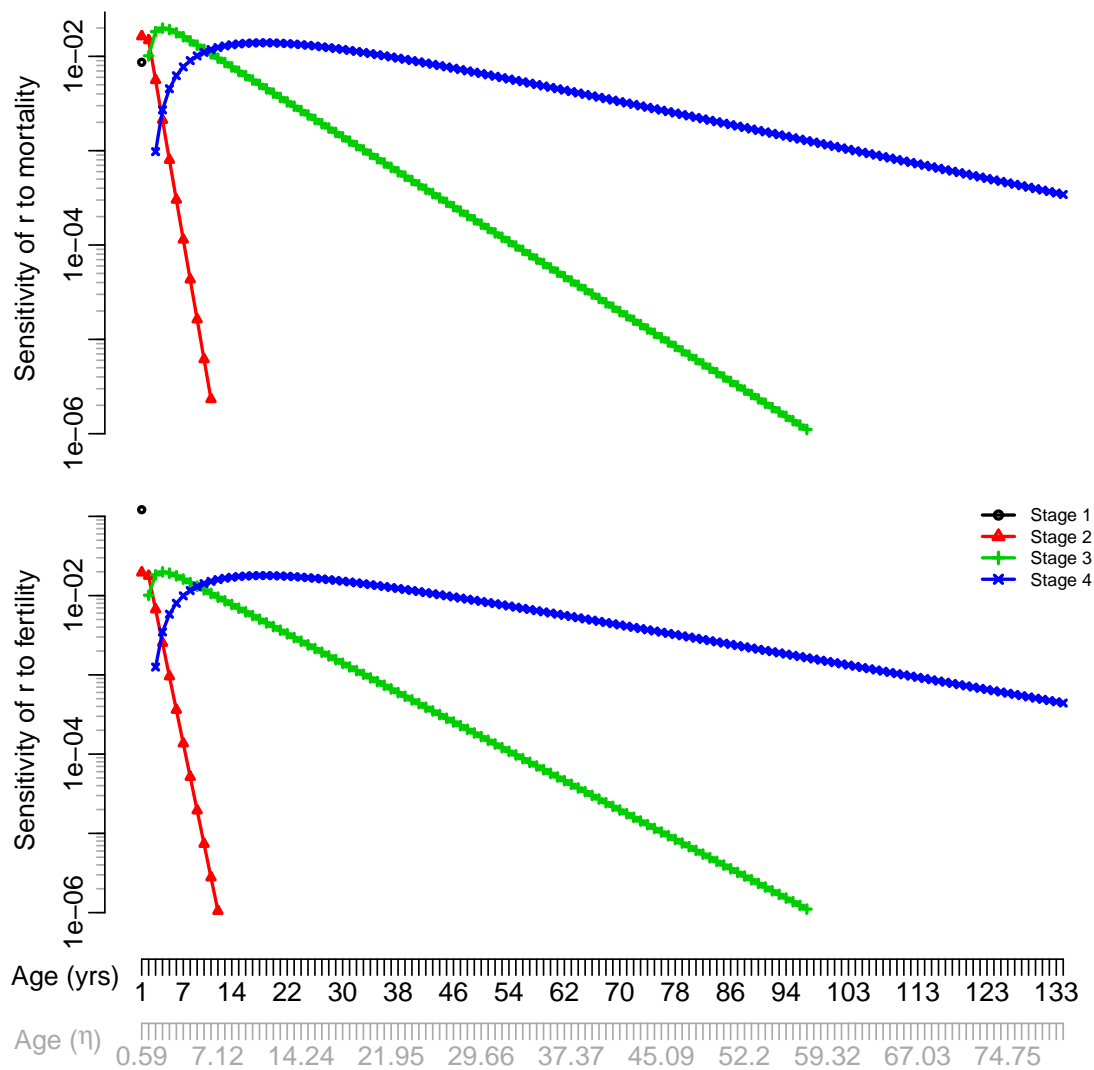

**Figure 93:** Selection gradients on age×stage-specific mortality and fertility. Top  $x$  axis represents age in years, whereas the bottom  $x$  axis represents time-scale normalized by the life expectancy ( $\eta$ ) of the first non-seedbank stage (FNSS) of the species.

S1.32 *Rhododendron ponticum* (Invasive)

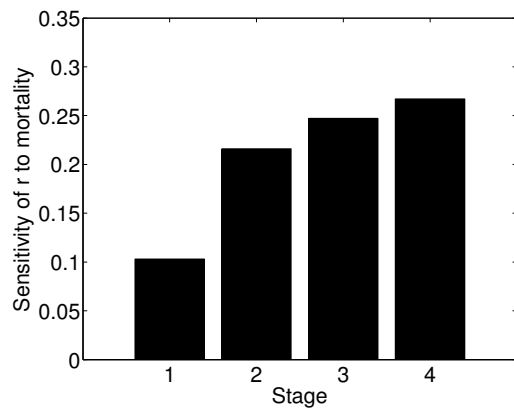

(a) Stage-specific mortality

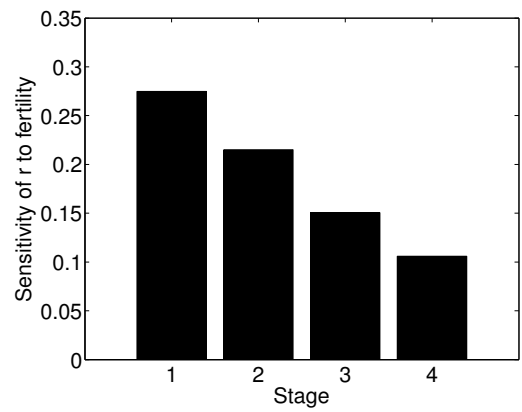

(b) Stage-specific fertility

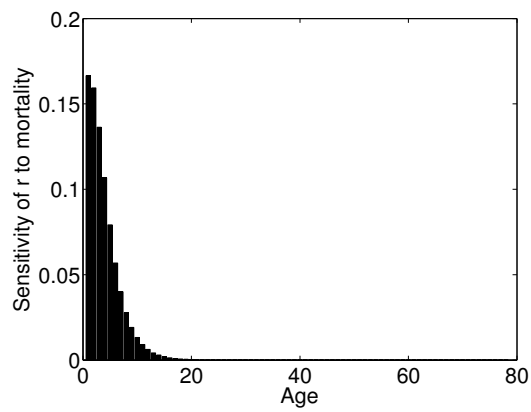

(c) Age-specific mortality

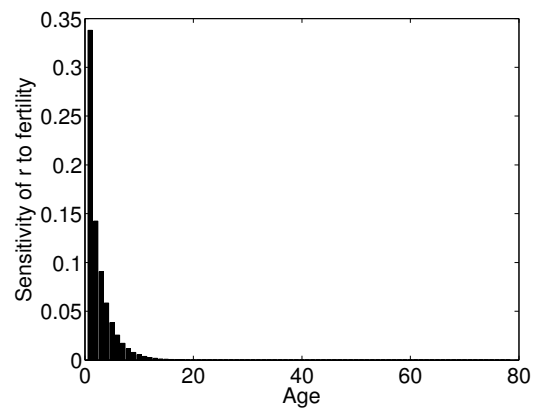

(d) Age-specific fertility

**Figure 94:** Selection gradients on age-specific and stage-specific mortality and fertility.

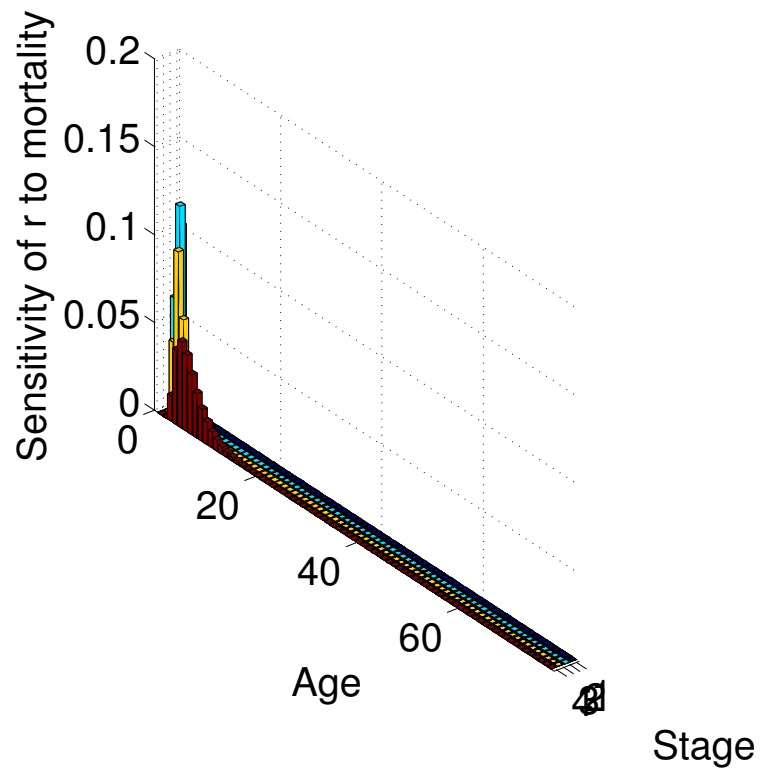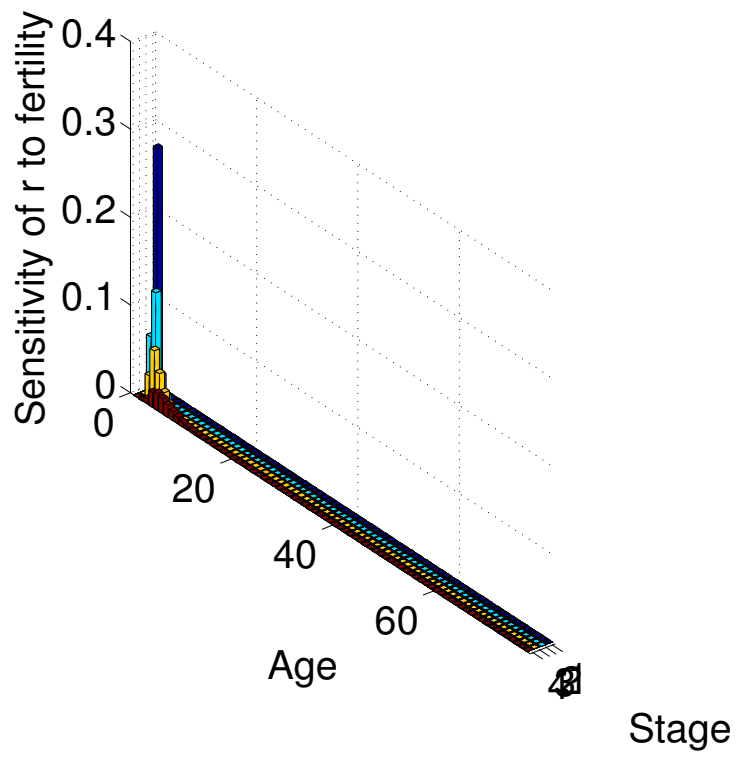

**Figure 95:** Selection gradients on age $\times$ stage-specific mortality and fertility.

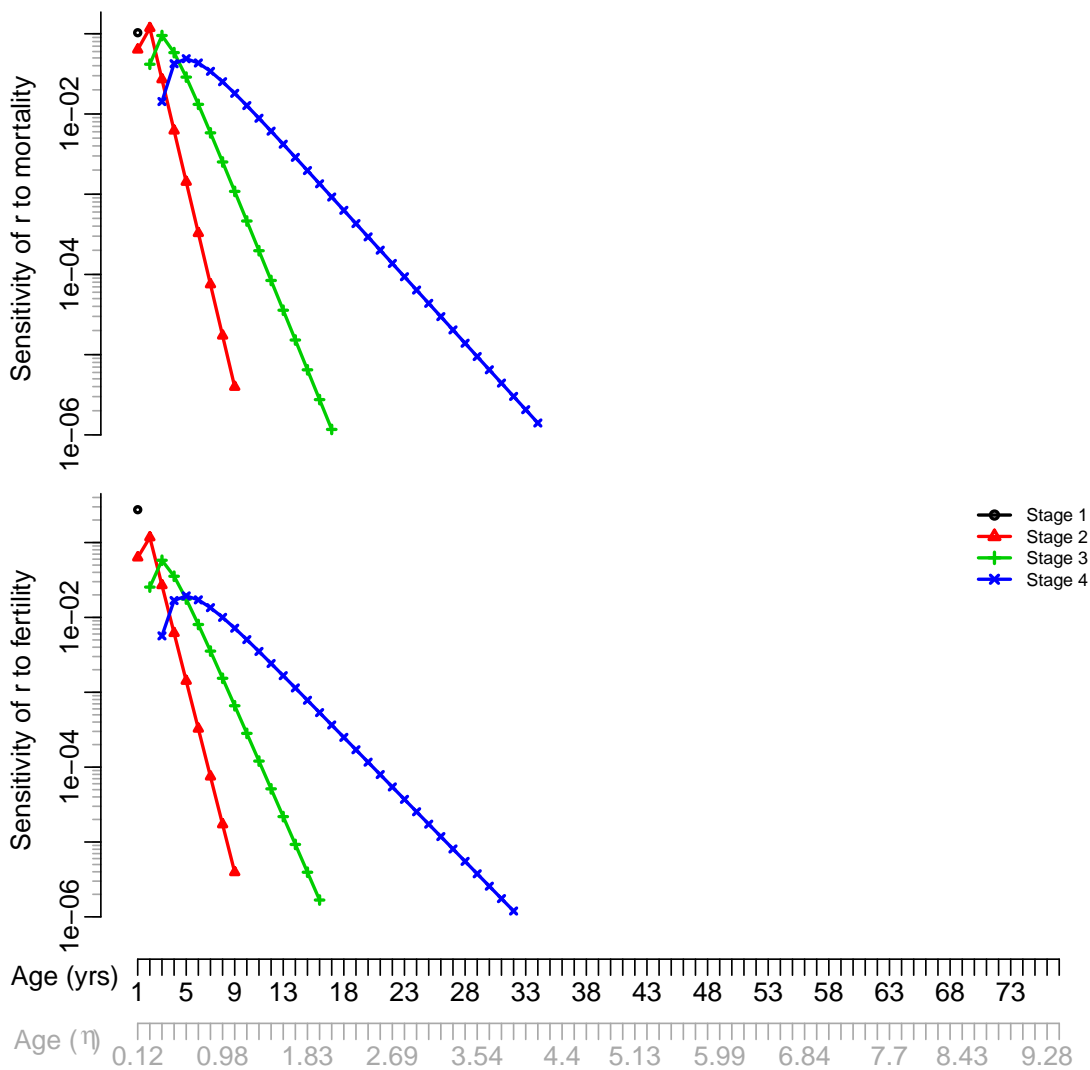

**Figure 96:** Selection gradients on age×stage-specific mortality and fertility. Top  $x$  axis represents age in years, whereas the bottom  $x$  axis represents time-scale normalized by the life expectancy ( $\eta$ ) of the first non-seedbank stage (FNSS) of the species.

S1.33 *Rhopalostylis sapida*

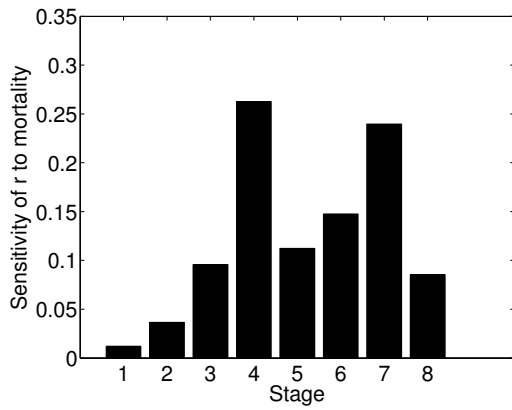

(a) Stage-specific mortality

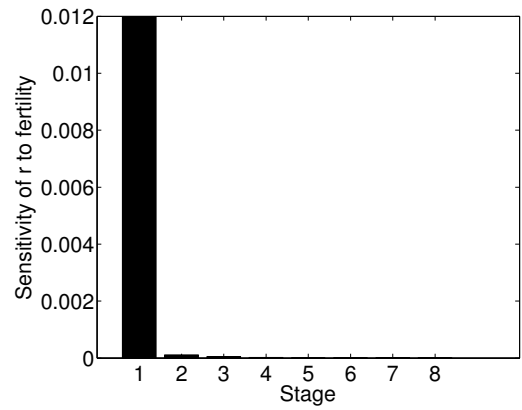

(b) Stage-specific fertility

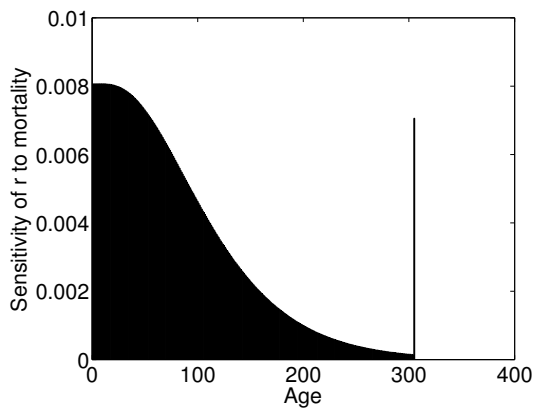

(c) Age-specific mortality

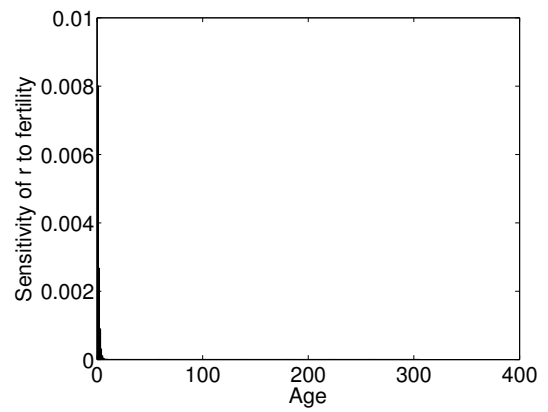

(d) Age-specific fertility

**Figure 97:** Selection gradients on age-specific and stage-specific mortality and fertility.

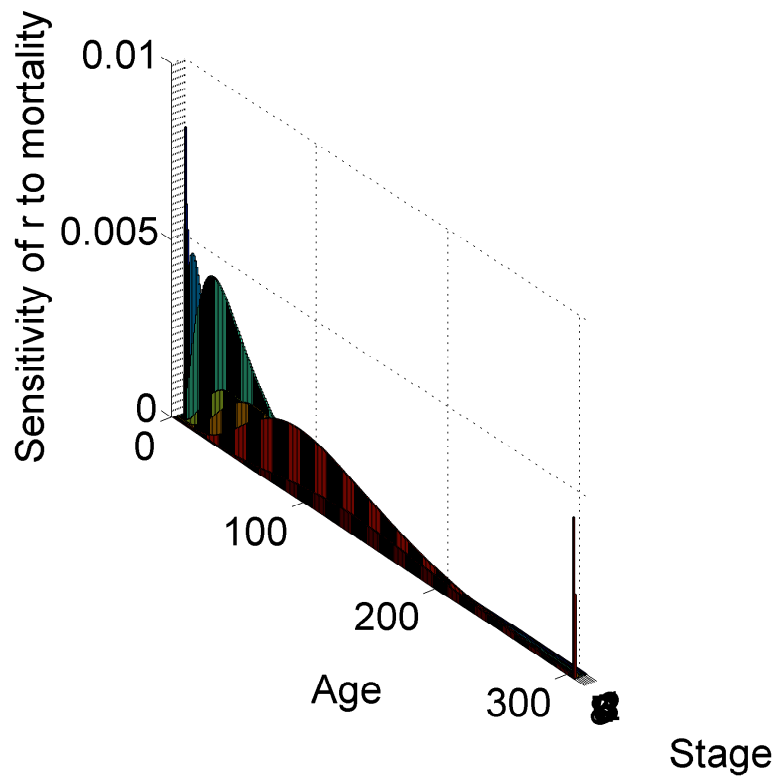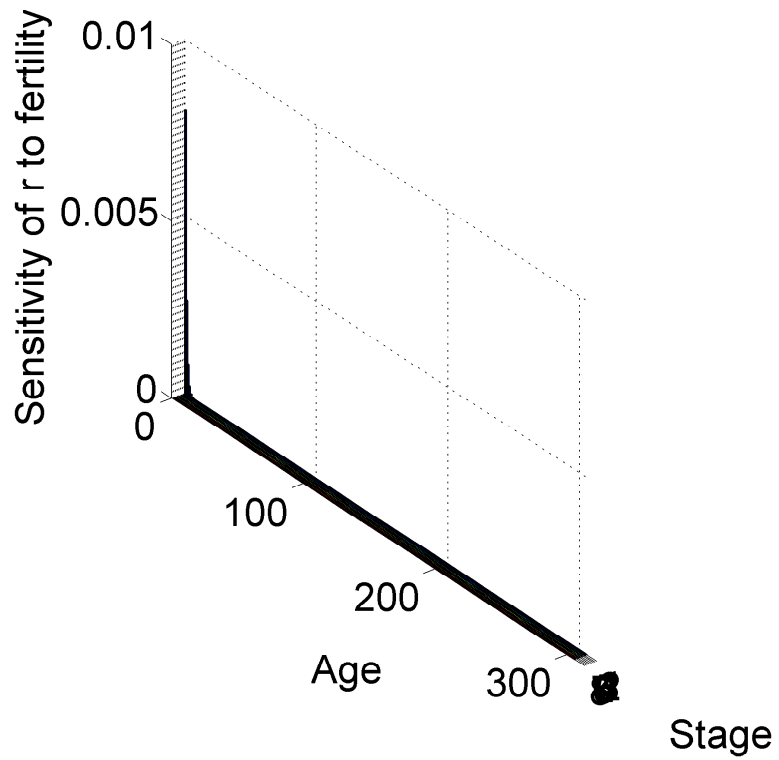

**Figure 98:** Selection gradients on age $\times$ stage-specific mortality and fertility.



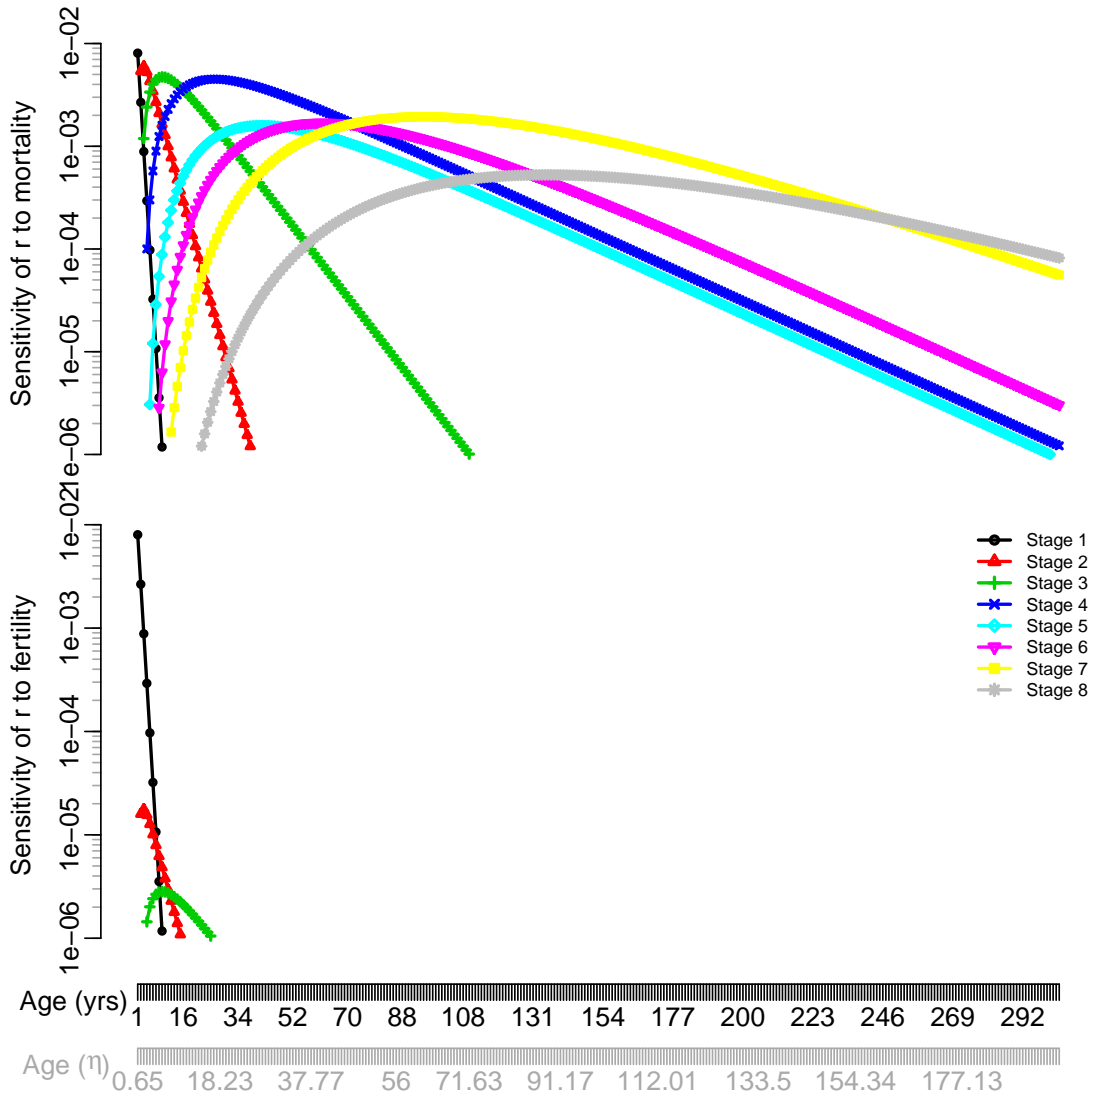

**Figure 99:** Selection gradients on age×stage-specific mortality and fertility. Top  $x$  axis represents age in years, whereas the bottom  $x$  axis represents time-scale normalized by the life expectancy ( $\eta$ ) of the first non-seedbank stage (FNSS) of the species.

S1.34 *Rourea induta*

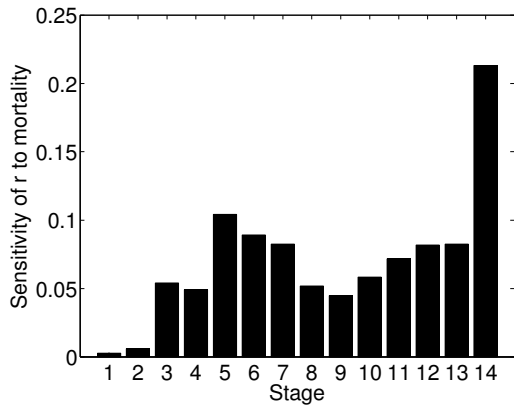

(a) Stage-specific mortality

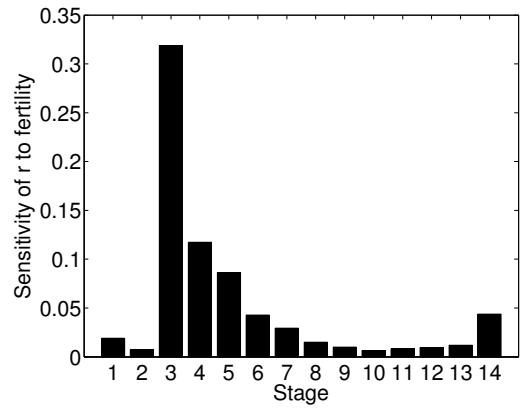

(b) Stage-specific fertility

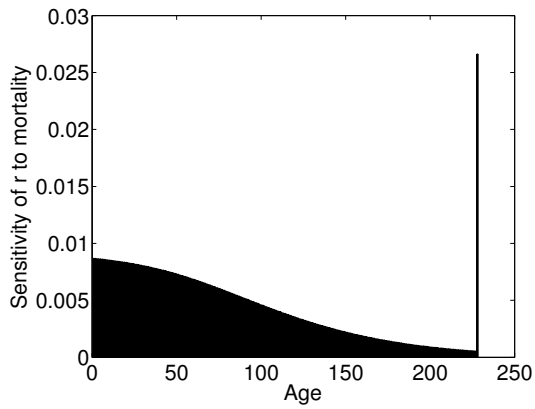

(c) Age-specific mortality

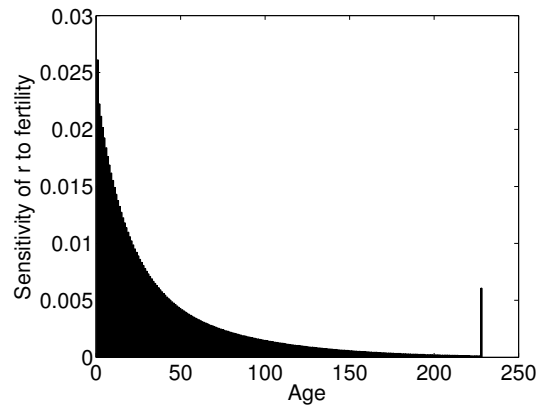

(d) Age-specific fertility

Figure 100: Selection gradients on age-specific and stage-specific mortality and fertility.

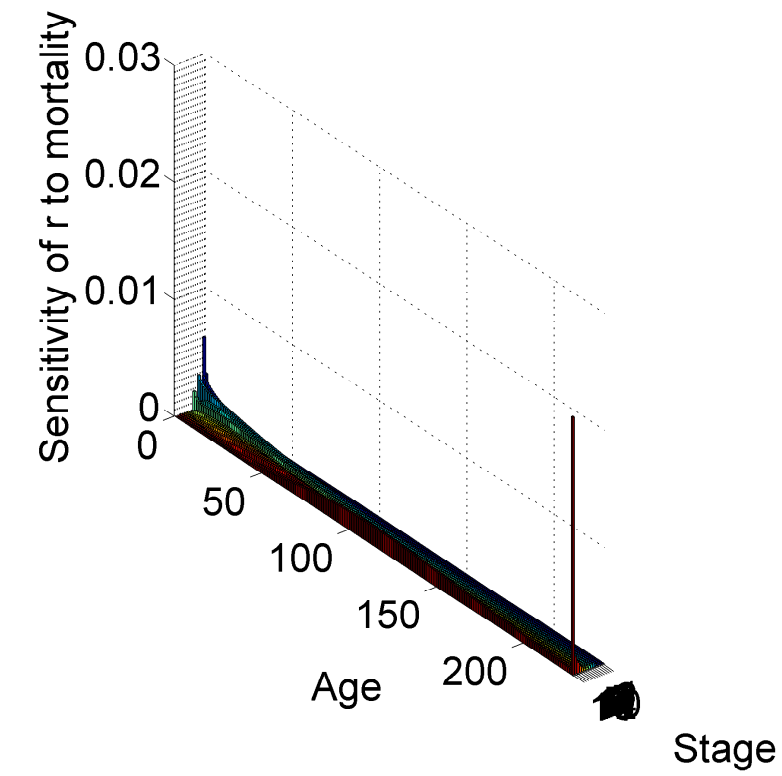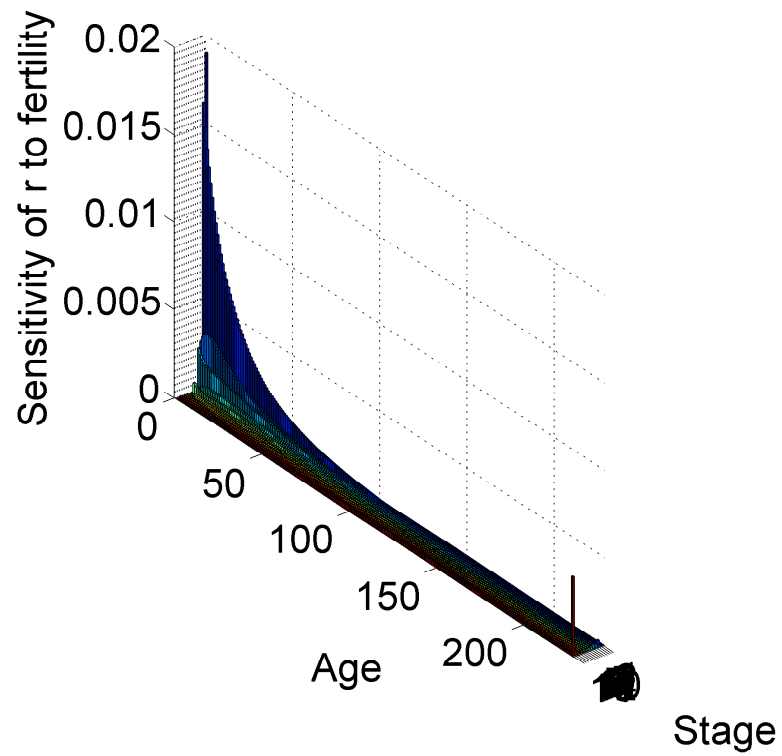

**Figure 101:** Selection gradients on age×stage-specific mortality and fertility.

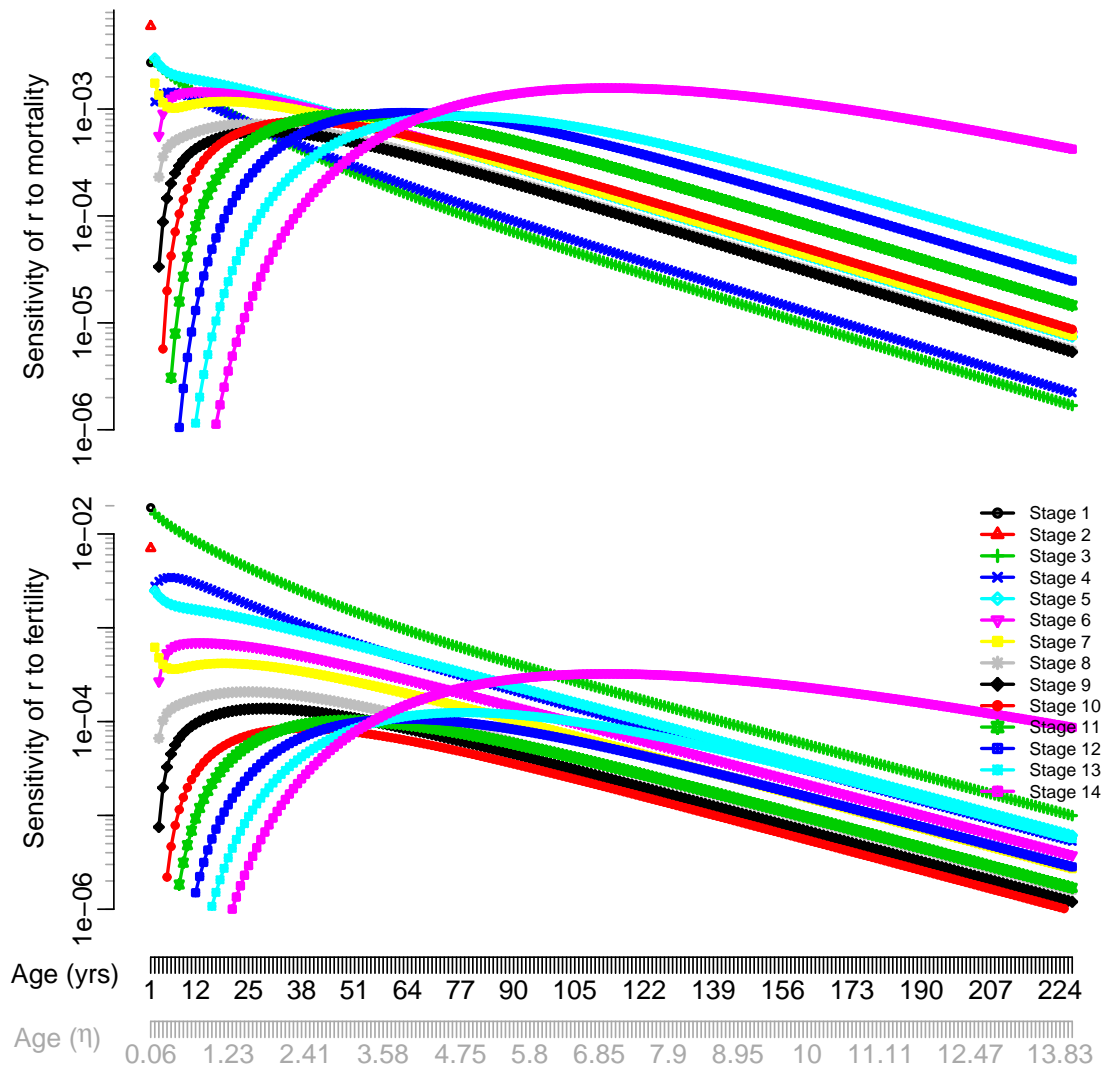

**Figure 102:** Selection gradients on age×stage-specific mortality and fertility. Top  $x$  axis represents age in years, whereas the bottom  $x$  axis represents time-scale normalized by the life expectancy ( $\eta$ ) of the first non-seedbank stage (FNSS) of the species.

S1.35 *Tillandsia recurvata*

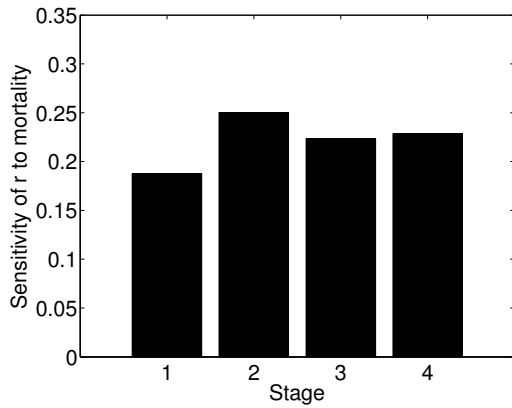

(a) Stage-specific mortality

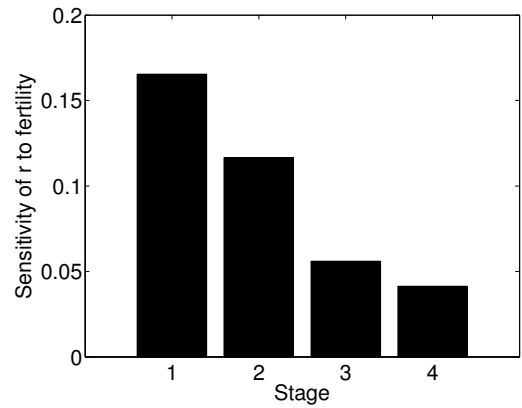

(b) Stage-specific fertility

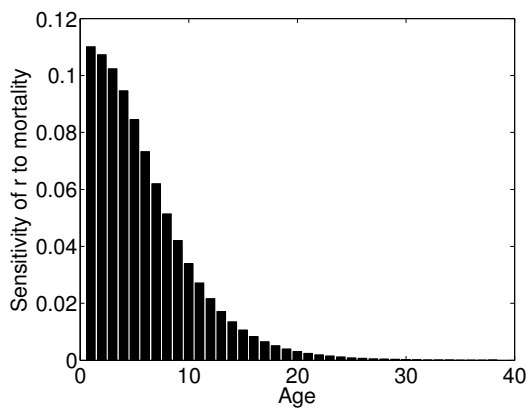

(c) Age-specific mortality

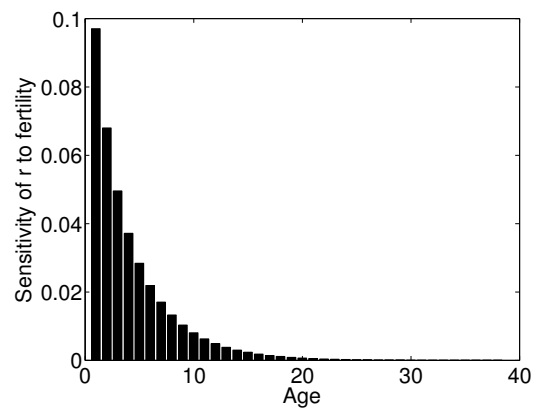

(d) Age-specific fertility

Figure 103: Selection gradients on age-specific and stage-specific mortality and fertility.

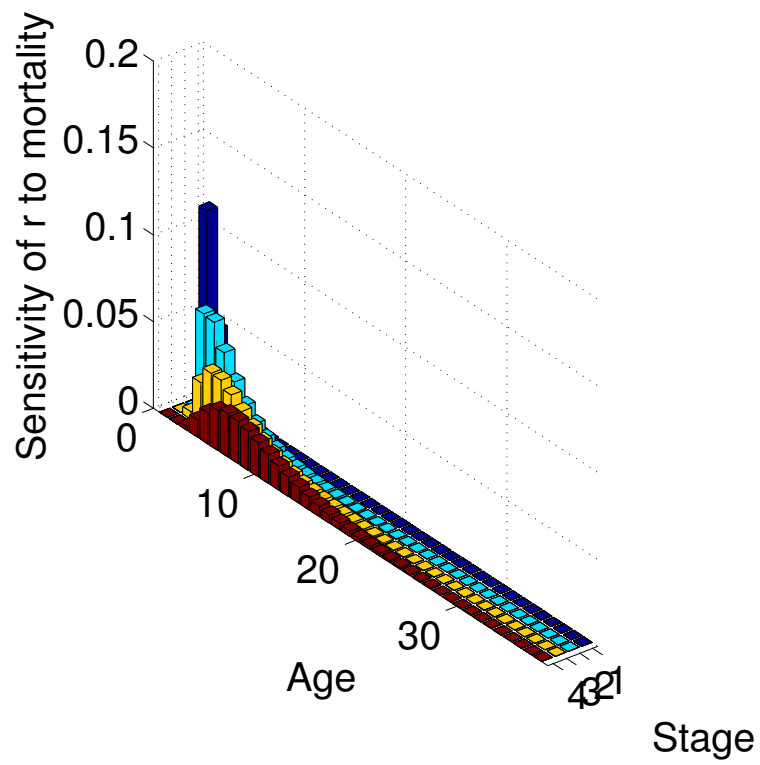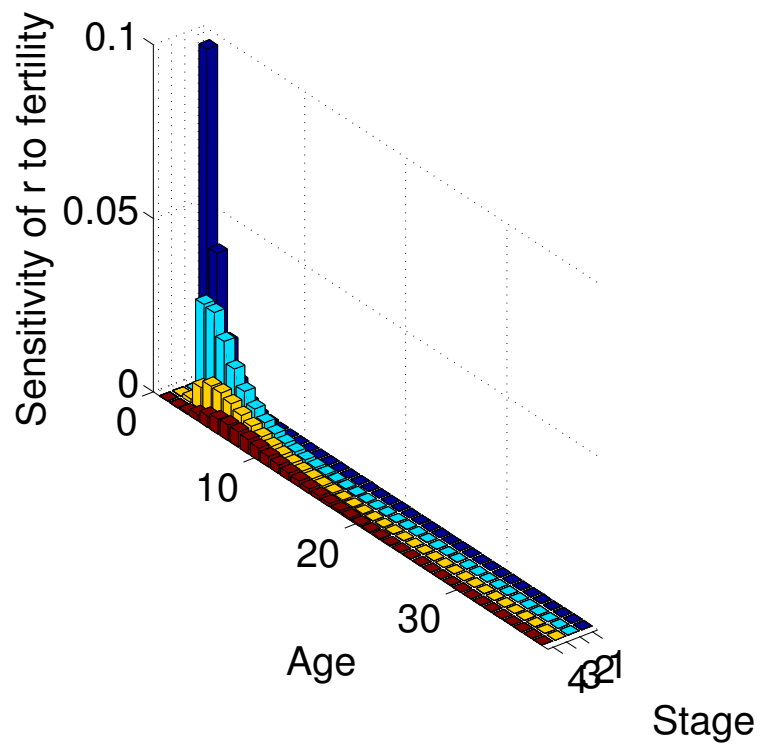

**Figure 104:** Selection gradients on age $\times$ stage-specific mortality and fertility.

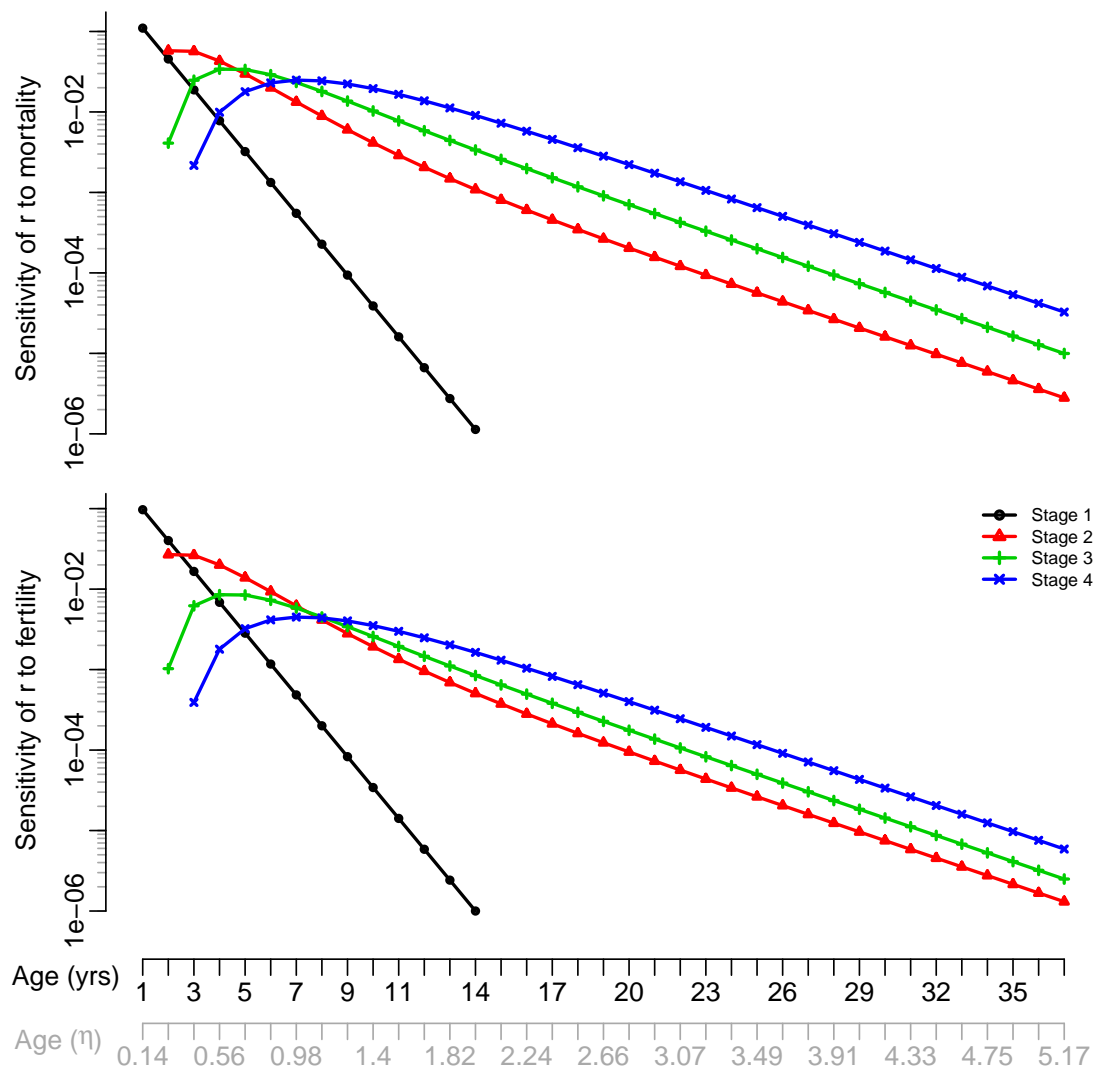

**Figure 105:** Selection gradients on age $\times$ stage-specific mortality and fertility. Top  $x$  axis represents age in years, whereas the bottom  $x$  axis represents time-scale normalized by the life expectancy ( $\eta$ ) of the first non-seedbank stage (FNSS) of the species.

S1.36 *Viburnum furcatum*

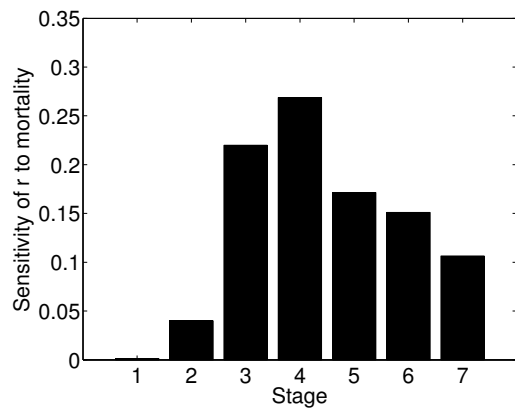

(a) Stage-specific mortality

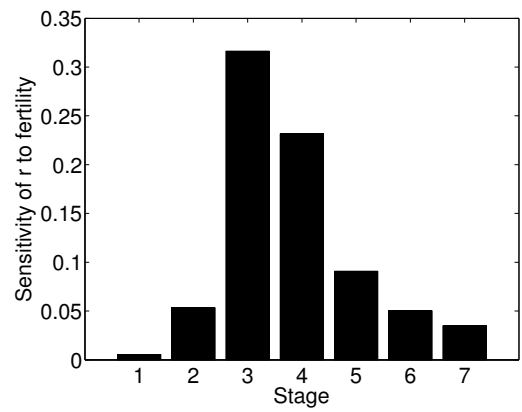

(b) Stage-specific fertility

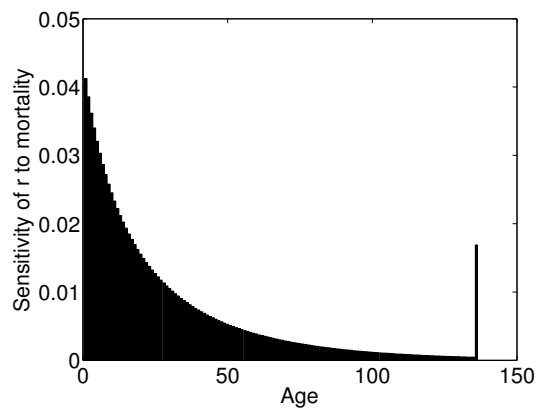

(c) Age-specific mortality

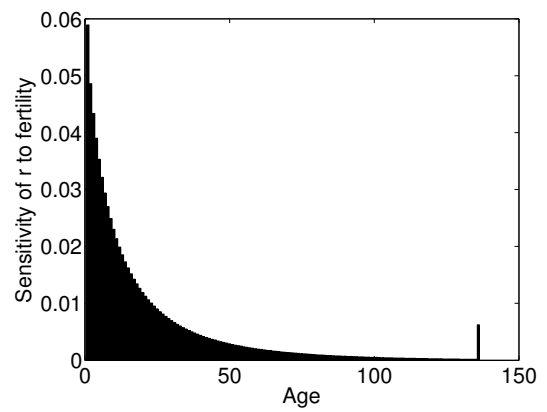

(d) Age-specific fertility

**Figure 106:** Selection gradients on age-specific and stage-specific mortality and fertility.



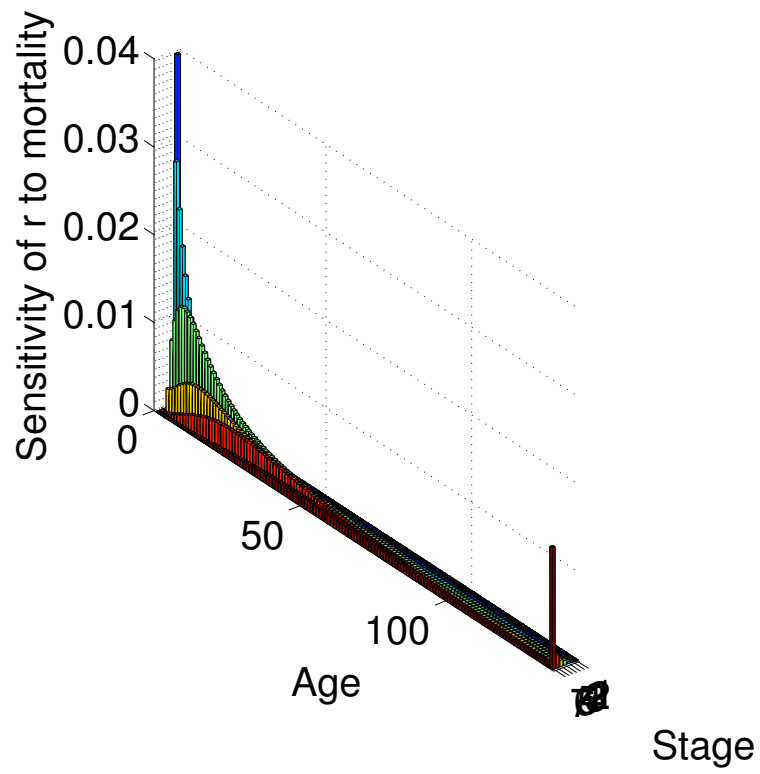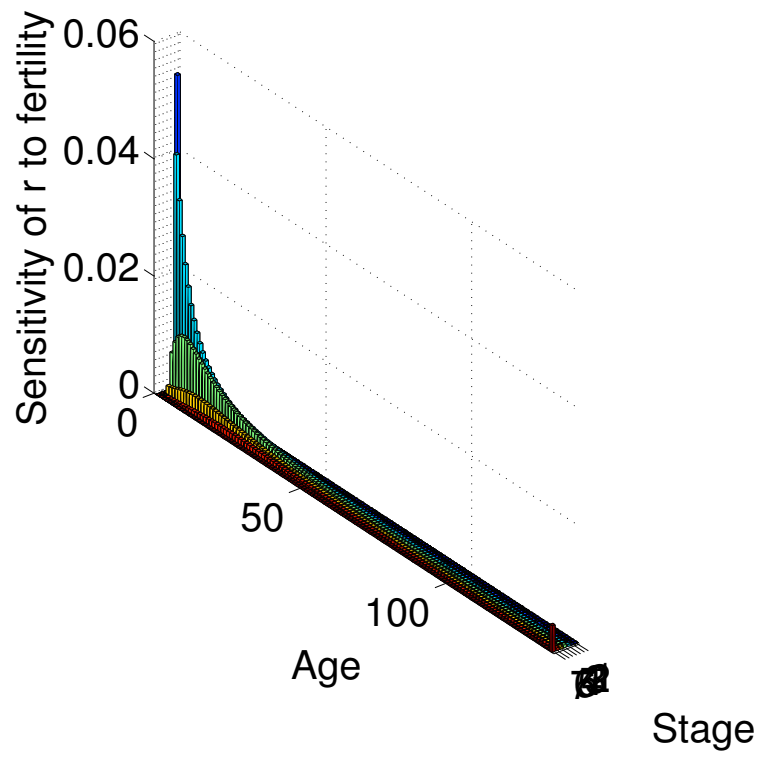

**Figure 107:** Selection gradients on age $\times$ stage-specific mortality and fertility.

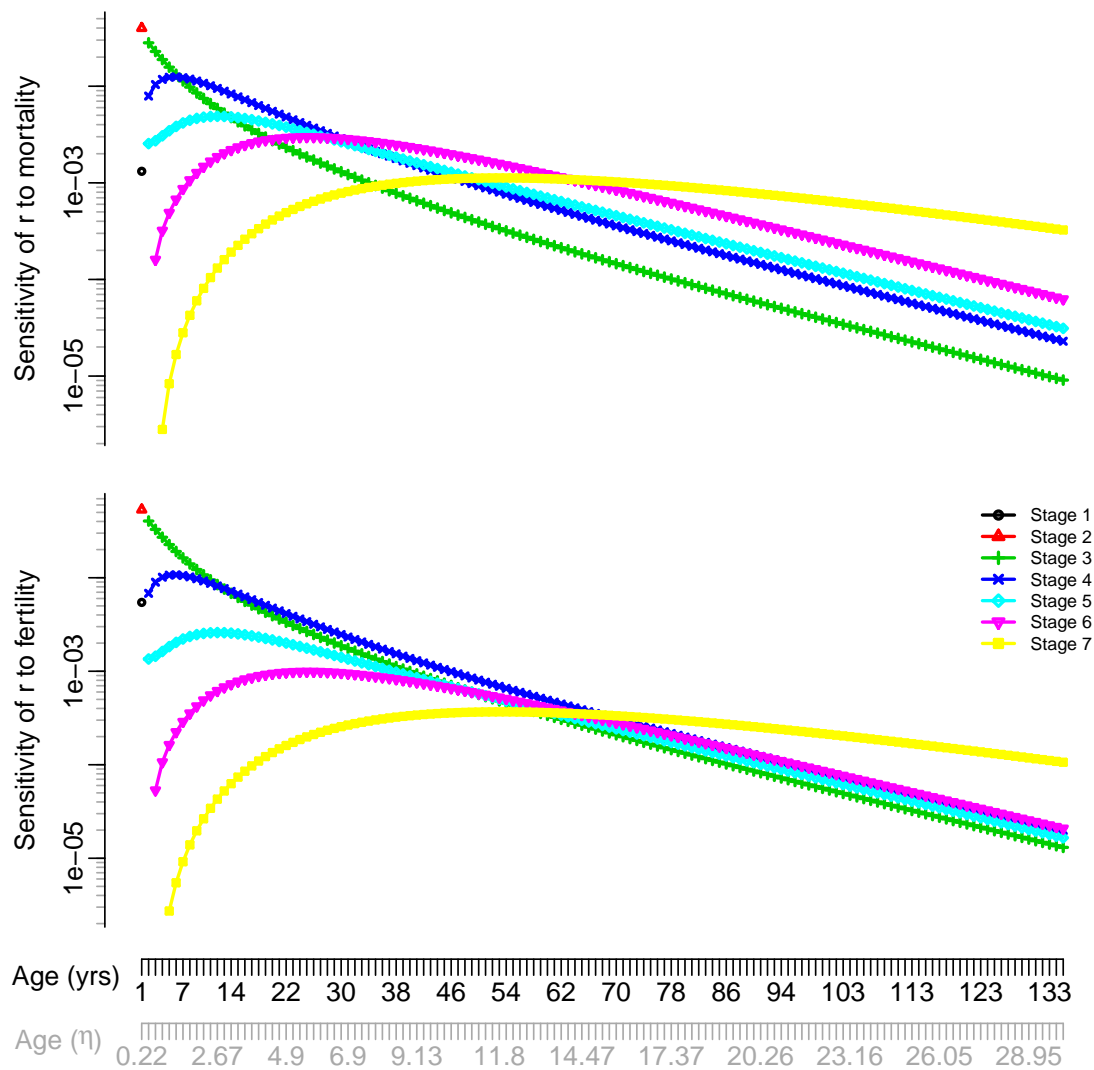

**Figure 108:** Selection gradients on age×stage-specific mortality and fertility. Top  $x$  axis represents age in years, whereas the bottom  $x$  axis represents time-scale normalized by the life expectancy ( $\eta$ ) of the first non-seedbank stage (FNSS) of the species.
